# Supplementary material
Source: PubMed Central journal article supplement (PMC5448231)
Supplement: pnas.1619928114.sapp.pdf [file pnas.1619928114.sapp.pdf]

## SI Text

### Table of contents

|                                                                                                                                   |    |
|-----------------------------------------------------------------------------------------------------------------------------------|----|
| <i>Chromochloris zofingiensis</i> strains and culture conditions .....                                                            | 2  |
| X-ray tomography .....                                                                                                            | 2  |
| DNA preparation and quality assessment.....                                                                                       | 2  |
| RNA preparation and quality assessment.....                                                                                       | 3  |
| RNA-Seq .....                                                                                                                     | 3  |
| <i>De novo</i> transcriptome conditions .....                                                                                     | 4  |
| Changes in gene expression during shift to high light .....                                                                       | 4  |
| Assembly overview .....                                                                                                           | 4  |
| Genomic and RNA-Seq sequences.....                                                                                                | 5  |
| Insert lengths and read preparation/composition.....                                                                              | 6  |
| Nuclear assembly Phases 1 and 2: Automated base assemblies.....                                                                   | 7  |
| Nuclear assembly Phase 3: optical map and chromosome-level scaffolding, joining, filling.....                                     | 8  |
| Nuclear assembly Phase 4: Pacific Biosciences reads, contig joining, and gap filling.....                                         | 9  |
| Overall structure of the nuclear genome .....                                                                                     | 12 |
| Telomeres.....                                                                                                                    | 12 |
| Centromeres .....                                                                                                                 | 13 |
| Ribosomal DNA (rDNA).....                                                                                                         | 16 |
| Repetitive sequence .....                                                                                                         | 17 |
| Known assembly issues .....                                                                                                       | 17 |
| Genomes of the chloroplast and mitochondrion.....                                                                                 | 21 |
| Mitochondrion.....                                                                                                                | 21 |
| Chloroplast.....                                                                                                                  | 21 |
| Transcriptome assembly used in training AUGUSTUS.....                                                                             | 24 |
| Details of Table S1 .....                                                                                                         | 25 |
| Calling of protein-coding gene families across the six organisms of Table S1 .....                                                | 28 |
| Details of main text Fig. 3B/C.....                                                                                               | 30 |
| Gene prediction and functional annotation.....                                                                                    | 31 |
| Astaxanthin-deficient mutants.....                                                                                                | 32 |
| Fig. S1. <i>Chromochloris zofingiensis</i> cell morphology .....                                                                  | 33 |
| Figs. S2-S10. Gene-level synteny comparisons .....                                                                                | 34 |
| Fig. S11. Chloroplast and Mitochondrial RNA-Seq<br>expression profiles across a range of growth conditions.....                   | 43 |
| Figs. S12-S21. Genes affected by transcriptomic conditions.....                                                                   | 45 |
| Table S1. Features of the <i>Chromochloris zofingiensis</i> genome<br>in comparison to selected previously sequenced genomes..... | 55 |
| Table S2. Homology determination by BLAST of<br>NCBI gene accessions in <i>Chromochloris zofingiensis</i> .....                   | 56 |
| Table S3: Putative <i>Chromochloris zofingiensis</i> gene models<br>for photosynthesis-related and metabolic genes .....          | 57 |
| Table S4. <i>Chromochloris zofingiensis</i> astaxanthin-deficient mutant characteristics. ....                                    | 69 |
| Table S5. PCR primers used to sequence beta-ketolase in <i>Chromochloris zofingiensis</i> .....                                   | 70 |
| Datasets key.....                                                                                                                 | 71 |
| SI References.....                                                                                                                | 73 |

## ***Chromochloris zofingiensis* strains and culture conditions**

We used the *Chromochloris zofingiensis* strain SAG 211-14 obtained from the Culture Collection of Algae at Goettingen University. The cells were grown at 25°C in liquid cultures shaking at 100–150 rpm in diurnal (16 h light, 8 h dark) conditions with light intensity of 90–100  $\mu\text{mol photons m}^{-2} \text{s}^{-1}$  unless stated otherwise. Cells were grown in Proteose Medium (UTEX Culture Collection of Algae) with Chu's micronutrient solution (2 mL/L, UTEX Culture Collection of Algae) unless stated otherwise. Cells were counted with the Multisizer 3 Coulter Counter (Beckman Coulter). Cells were harvested by centrifugation (2,200–4,620  $g$  for 5–10 min), discarding the supernatant, resuspending the cells in media and transferring to an eppendorf tube, pelleting by centrifugation (15,000  $g$  for 5 min), discarding the supernatant, and freezing the cell pellet in liquid nitrogen unless stated otherwise.

## **X-ray tomography**

Cells were grown until log phase, pelleted by centrifugation (700  $g$  for 2 min), and then loaded into custom-made thin-walled glass capillaries (1). Glass capillaries had been previously dipped in a solution of 100 nm gold nanoparticles (EMGC100, BBI International, Cardiff, CF14 5DX, UK), which were subsequently used as fiducial markers for alignment of the X-ray projections. Once loaded into capillaries, cells were cryo-preserved by plunging the tip of the specimen capillary into a  $\sim 90$  K reservoir of liquid propane at 2  $\text{m s}^{-1}$  using a custom-made fast-freezing apparatus.

Soft X-ray tomographic data were acquired using the cryogenic soft X-ray microscope in the National Center for X-ray Tomography (NCXT) at the Advanced Light Source in Berkeley, California. The microscope and image acquisition have been described in detail previously (2, 3). Projection images were collected at 517 eV using a Fresnel zone plate with a resolution of  $\sim 50$  nm as the objective lens. For each data set, 90 projection images were acquired spanning a range of 180°. During data acquisition, the specimen was kept in a stream of helium gas that had been cooled to liquid nitrogen temperatures to maintain cryo-preservation of the sample. Depending on the thickness of the specimen, exposure times for each projection image varied between 200 and 350 ms. 3-D reconstructions of the X-ray projections were calculated using the software package IMOD after manually tracking fiducial markers on adjacent images for alignment (4). AMIRA (FEI) was used to semi-automatically segment the 3-D volumetric reconstructions into subcellular compartments (lipid droplets, chloroplasts, starch, mitochondria) based on their different gray level ranges. Segmentation of the nucleus was performed manually.

## **DNA preparation and quality assessment**

Genomic DNA was prepared as follows. Total cellular DNA was extracted from cells grown in 1 L cultures to  $\sim 5 \times 10^6$  cells/mL. Harvested cells were resuspended in 300  $\mu\text{L}$  Milli-Q purified water and 500  $\mu\text{L}$  lysis buffer (100 mM Tris-HCl pH 8.0, 40 mM EDTA, 400 mM NaCl, 2% SDS) and incubated for 2 h at 65°C while rotating. 170  $\mu\text{L}$  of 5 M NaCl and 135  $\mu\text{L}$  of 10% w/v CTAB in 700 mM NaCl were added. After incubation for 10 min, the DNA was extracted by adding phenol:chloroform, vigorously shaking, and centrifuging ( $\sim 15,000$   $g$  for 5 min) to separate phases. The aqueous phase was removed and placed in a new tube with 5  $\mu\text{L}$

of RNase A, incubated for 20 min at 37°C, and followed by two additional phenol:chloroform extractions and one chloroform extraction. To precipitate the DNA, 0.1× sample volume of 5 M NaCl and 0.7× sample volume of isopropanol were added to the resulting aqueous phase, the sample was mixed, and pelleted by centrifugation (15,000 g for 15 min at 4°C). The supernatant was removed and pellet was washed with cold 70% ethanol, centrifuged (15,000 g for 5 min at 4°C), and the supernatant removed. The DNA was cleaned with an ethanol precipitation step (100% ethanol, 100 mM sodium acetate pH 5, overnight at 20°C), centrifuged (~15,000 g for 5 min at 4°C), and followed by an ethanol wash. The DNA pellet was briefly air-dried and resuspended in Milli-Q purified water. DNA concentration and quality was assessed by optical absorbance on a NanoDrop 2000 spectrophotometer (Thermo Scientific).

To obtain high molecular weight DNA (~270 Kbp) for optical mapping, 1 L of cells were grown to  $\sim 5 \times 10^6$  cells/ml. The harvested cell pellet was washed twice with cold ethanol and resuspended in buffer (200 mM NaCl, 100 mM EDTA, 10 mM Tris, pH 7.2). An equal volume of 1% agarose was gently mixed with the cells and the cell-agarose suspension was aliquoted into plug molds and cooled (4°C for ~60 min). The cell wall was digested by incubating the cell plugs in protoplasting solution (4% w/v hemicellulose, 2% w/v driselase, 1 M sorbitol, 5 mM sodium citrate, 240 mM EDTA pH 8.0, 10 mM 2-mercaptoethanol) overnight at 37°C while shaking. To lyse the cells, the protoplasting solution was removed and the cell plugs were incubated in lysis solution (0.5 M EDTA pH 9.5, 1% w/v *N*-lauroylsarcosine, 5 mg/ml proteinase K) overnight at 50°C. The lysis solution was removed and the cell plugs placed in 0.5 M EDTA pH 9.5 and shipped to OpGen, Inc. for optical mapping using BamHI enzyme.

### **RNA preparation and quality assessment**

RNA was prepared as follows. Cells were washed with cold ethanol on dry ice and ethanol was removed by centrifugation (2,200 g for 3 min at 4°C). To break cells open, cells were homogenized with lysing matrix D on dry ice for 2× 60 s with the FastPrep-24 (6.0 m s<sup>-1</sup>, MP Biomedicals). Buffer (50 mM Tris-HCl pH 8.0, 200 mM NaCl, 20 mM EDTA, 2% SDS, 1 mg/mL proteinase K) was added, samples were vortexed and incubated for 3 min at room temperature, and cell debris was pelleted by centrifugation (20,000 g for 3 min). 1 mL of sample was added to 10 mL of TRIzol in MaXtract HD tube and incubated for 3 min at room temperature. To extract RNA, 1/5 volume chloroform was added, samples were vigorously shaken, incubated for 5 min at room temperature, and phases were separated by centrifugation (800 g for 5 min at 22°C) and decanting. Total RNA was precipitated by adding cold ethanol on the aqueous phase and purified using the miRNeasy mini kit (Qiagen). RNA was eluted with DEPC-treated water and cleaned with an ethanol precipitation step (100% ethanol, 85 mM sodium acetate pH 8.0), centrifugation (~15,000 g for 5 min at 4°C), and ethanol washing. The pellet was briefly air-dried and resuspended in DEPC-treated water. RNA concentration and integrity was assessed by NanoDrop 2000 spectrophotometer (Thermo Scientific) and Agilent 2100 Bioanalyzer.

### **RNA-Seq**

Total RNA was purified from each culture as described above. The rRNA was selectively depleted with the Ribo-Zero rRNA Removal Kit (Plant Leaf) according to the manufacturer's

instructions (Illumina). The remaining RNA was converted into cDNA and made into sequence-ready libraries with the KAPA Stranded RNA-Seq Kit (Kapa Biosystems). The 14 *de novo* transcriptome RNA-Seq libraries were pooled and sequenced with 150+150 bp paired-end reads on two lanes of a HiSeq 2500 high-throughput sequencer according to manufacturer's instructions (Illumina). The 44 high light RNA-Seq libraries were combined into three pools and sequenced with 50 bp single-end reads on three lanes of a HiSeq 2500.

The resulting data was demultiplexed with in-house scripts. Adapter sequences were trimmed with Scythe (5) and aligned to the ChrZofV5 release of the *C. zofingiensis* genome with RNA STAR (6). Determination of counts per gene and transcript abundance in terms of fragments per Kbp of gene per million mapped fragments (FPKMs, Datasets S20–S21) were made with Cuffdiff (7). Further analyses and figures were generated with cummeRbund package in the R statistical computing environment (8). PCA was performed with `plotPCA()` from the R `affy` package (9). Two-fold differentially-expressed genes and regularized  $\log_2$ -transformation were performed with the R DESeq2 package (10).

### ***De novo* transcriptome conditions**

Transcriptome material was derived from 100 mL cultures of cells ( $\sim 4\text{--}9 \times 10^6$  cells/mL) from 14 different conditions: high light (400  $\mu\text{mol photons m}^{-2} \text{ s}^{-1}$ ), medium light (100  $\mu\text{mol photons m}^{-2} \text{ s}^{-1}$ ), low light (10  $\mu\text{mol photons m}^{-2} \text{ s}^{-1}$ ), glucose (20 mM), 48 h darkness, 4 h anaerobic, 4 h dark and anaerobic, 1 h without sulfur (Bristol's Medium without  $\text{MgSO}_4$ , UTEX Culture Collection of Algae), 1 h without nitrogen (Bristol's Medium without  $\text{NaNO}_3$ ), 1 h without phosphorus (Bristol's Medium without  $\text{K}_2\text{HPO}_4$ ,  $\text{KH}_2\text{PO}_4$ ), 1 h without iron (Bristol's Medium), low oxidative stress (5  $\mu\text{M}$  rose bengal, 0.5 h dark followed by 1 h 100  $\mu\text{mol photons m}^{-2} \text{ s}^{-1}$ ), high oxidative stress (5  $\mu\text{M}$  rose bengal, 0.5 h dark followed by h 100  $\mu\text{mol photons m}^{-2} \text{ s}^{-1}$ ), and hydrogen peroxide oxidative stress (1 mM  $\text{H}_2\text{O}_2$ ). Cells were collected by centrifugation (2,200 g for 5 min at 4°C), the supernatant was discarded and the cell pellet was frozen in liquid nitrogen.

### **Changes in gene expression during shift to high light**

The gene expression light intensity experiment from medium light (100  $\mu\text{mol photons m}^{-2} \text{ s}^{-1}$ ) to high light (400  $\mu\text{mol photons m}^{-2} \text{ s}^{-1}$ ) was conducted as follows. 1 L cell cultures were grown to log phase ( $\sim 3.0 \times 10^6$  cells/mL) under medium light (100  $\mu\text{mol photons m}^{-2} \text{ s}^{-1}$ ). Cultures were mixed and divided into 75 mL cultures in sterile 250 mL beakers. After acclimating overnight, the light treatment cultures were moved from 100  $\mu\text{mol photons m}^{-2} \text{ s}^{-1}$  to 400  $\mu\text{mol photons m}^{-2} \text{ s}^{-1}$ , while control cultures were maintained under 100  $\mu\text{mol photons m}^{-2} \text{ s}^{-1}$ . Replicates ( $N = 4$ ) were collected at 0, 0.5, 1, 3, 6, and 12 h, harvested by centrifugation (200 g for 5 min at 4°C), and frozen in liquid nitrogen. RNA was extracted, processed, and analyzed as described above.

### **Assembly overview**

Next-generation sequencing and associated software has made draft assemblies via short-read whole genome shotgun sequencing easy and relatively automatic. For eukaryotic organisms,



these drafts are typically highly fragmentary by traditional standards of model organisms, with fragments often of size spanning only one to a few genes at a time. For *Chromochloris*, we aimed for a chromosome-level assembly comparable to model organisms, and initial drafts purely via automated short-read methods were only of “gene-space” quality and did not meet the goal. Hence, additional data — a global optical restriction fragment map from OpGen, Inc. and long reads via Pacific Biosystems (“PacBio”) — were collected. No software was found able to automatically incorporate this additional data well enough to meet the assembly goal; hence, extensive manual integration effort was expended to meet the goal starting from automated assemblies as a base. As the methods used are uncommon, they are described in detail below.

## Genomic and RNA-Seq sequences

Two Illumina paired-end libraries — “S” with shorter and “L” with longer inserts — were prepared as described earlier for genomic (combined nuclear, chloroplast, and mitochondrion) sequencing, including Illumina inline controls and a small amount of Illumina PhiX. Each library was run as an entire single lane of a HiSeq 2000 V3 flowcell at the UCLA BSCRC Sequencing Core to obtain ~104M (“S”) and ~66M (“L”) paired end 100+100 nt reads with ~96% of pairs passing RTA PF=1 (PF=0 pairs were discarded). (Pacific Biosciences genomic reads are discussed later.) Fourteen Illumina TruSeq paired-end RNA-Seq sub-libraries were prepared as described earlier. A single equi-molar pool was run on both lanes of a HiSeq 2500 V1 rapid flowcell at the UCLA BSCRC Sequencing Core to obtain ~476M 151+151 nt read pairs with 7 nt TruSeq index reads with ~86% of pairs passing RTA PF=1 (PF=0 pairs were discarded). Demultiplexing for assembly by perfect match to expected 7-mers gave ~23M to ~34M read pairs per sub-library and ~397M (~97% of PF=1) read pairs total.

Analyses of reads, a multitude of *in silico*-targeted subsets of reads, and various fractions of reads (e.g., heads or tails of first or second ends) were made over many iterations, starting with exploratory preliminary analyses under minimal assumptions and proceeding toward final analyses as conclusions and partial results accumulated. Tools used included assemblers Ray (11), ABySS (12), and ALLPATHS-LG (13, 14); aligners Bowtie (15), Bowtie2 (16), HISAT/HISAT2 (17), BLAST (18), BLAST+ (19), LAST (20), LASTZ (21), BLAT (22), OpGen, Inc.’s MapSolver, BLASR (23), and Parasail (24); error correctors / double-sequenced end overlappers / adapter trimmers Proovread (25), SeqPrep (26), and Cutadapt (27); sequence analyzers Jellyfish (28), MUMmer (29), TRF (30), IRF (31), RepeatMasker (32) with RepeatMasker Update (33), and RepeatModeler (34); gene callers AUGUSTUS (35) and tRNAscan-SE (36); visualization/analysis tools Savant (37), IGB (38), IGV (39), Biomatters Limited’s Geneious, and Circos (40); GUI automaton Keyboard Maestro of Stairways Software Pty Ltd.; standard UNIX text-processing tools as well as bioinformatic utilities such as SAMtools (41), DEXTRACTOR (42), HTSeq (43), and EMBOSS (44); databases of biological knowledge such as NCBI (45), Pfam (46), and Rfam (47); as well as custom one-off programs and scripts written in languages such as C++, Perl, Wolfram’s Mathematica, and MathWorks’s MATLAB. Some computations were carried out on the UCLA Hoffman2 computing cluster.

## Insert lengths and read preparation/composition

From preliminary and later assemblies, mode insert lengths exclusive of adapters were  $\approx 156$  nt for “S” and  $\approx 370$  nt for “L”, with “S” fairly Gaussian with standard deviation  $\approx 16$  nt, but “L” bimodal with approximately one third in a wide mode at  $\approx 200$  nt and two thirds in a non-Gaussian narrower mode at  $\approx 370$  nt skewed longer.

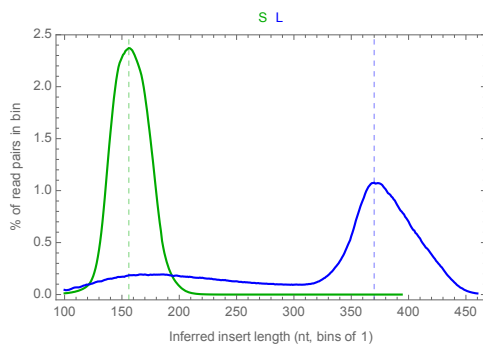

Inserts below 100 nt read into adapters (empirically verified to be as expected: for “S”, first end A + TruSeq #6 + dark/poly-A, second end reverse complement of TruSeq universal adapter + dark/poly-A; for “L”, same except with TruSeq #12). Little of the “S” and “L” distributions is so short, and only  $\sim 150$ K ( $< \sim 0.2\%$ ) of “S” and  $\sim 271$ K ( $< \sim 0.5\%$ ) of “L” pairs contain  $\geq 1$  16-mer of consensus adapter ignoring dark/poly-A tails. Preliminary analyses often did not try to identify and remove adapters, while later analyses generally had them stripped via SeqPrep or Cutadapt.

Inserts below 200 nt have overlapping ends: almost all of the “S” distribution is as such, and a fraction of the shorter “L” mode is as well. Early analyses identified overlapped ends (merging double-sequencing to form consensus virtual single end reads) via unique overlaps of  $\geq 16$  nt with  $\leq 3$  mismatches;  $\sim 88\%$  of “S” pairs and  $\sim 7\%$  of “L” pairs were merged. The resulting pool of reads used for initial assemblies was then  $\sim 89$ M and  $\sim 5$ M virtual single end reads of total sizes  $\sim 14$  Gnt and  $\sim 0.7$  Gnt, and  $\sim 12$ M and  $\sim 59$ M read pairs of total sizes  $\sim 2$  Gnt and  $\sim 12$  Gnt, for a grand total of  $\sim 28.6$  Gnt. Later analyses used SeqPrep for overlap detection and merging.

Rough composition is  $\approx 1.3\%/1.0\%$  of “S”/“L” pairs as Illumina inline process controls (with  $\sim 95\%/97\%$  of pairs with  $\geq 20\%$  of 16-mers hitting a known control having  $\geq 80\%$  of 16-mers being hits) and  $\approx 1.8\%/2.9\%$  as PhiX (with  $\sim 94\%/98\%$  of pairs with  $\geq 5\%$  of 16-mers hitting *de novo* circular PhiX having  $\geq 2/3$  of 16-mers being hits), leaving  $\approx 97\%/96\%$  for nuclear genome + chloroplast + mitochondrion. Once organelle genomes became available,  $\approx 0.5\%/0.7\%$  and  $\approx 0.2\%/0.2\%$  was estimated as chloroplast and mitochondrion, respectively.

With (1) coverage plentiful relative to the  $\approx 58$  Mbp assembly size estimate (see next section), (2)  $\approx 70\%/80\%$  of “S”/“L” PhiX read pairs manifestly error-free, and (3) several dozen not unlikely corruption possibilities of comparable probability existing for a typical read (e.g., although PhiX errors concentrated as expected at the tails of reads, error position probability was substantial across more than 20 nt), it was decided to not generally perform spectral-based read “error correction” procedures on the Illumina reads. (However, as discussed later, correction of the Pacific Biosciences reads was critical for their use in refining the assembly.

## Nuclear assembly Phases 1 and 2: Automated base assemblies

Histograms of the number of times distinct strand-collapsed (e.g., Jellyfish “canonical”)  $k$ -mers appeared in the prepared Illumina read pool for various  $k$  suggested that potential diploidy was not a great concern, multi-copy repeats (although surely present) did not constitute an excessive fraction of the genome, and there were no large contaminants (e.g., bacterial genomes), suggestions later supported by data such as the ~58 Mbp optical size estimate and BLAST comparisons of final genome products against the universe of NCBI sequences. Plateaus visible in the cumulative plot provided one of the filterable signals by which the assembly of non-chromosomal sequences (discussed later) began.

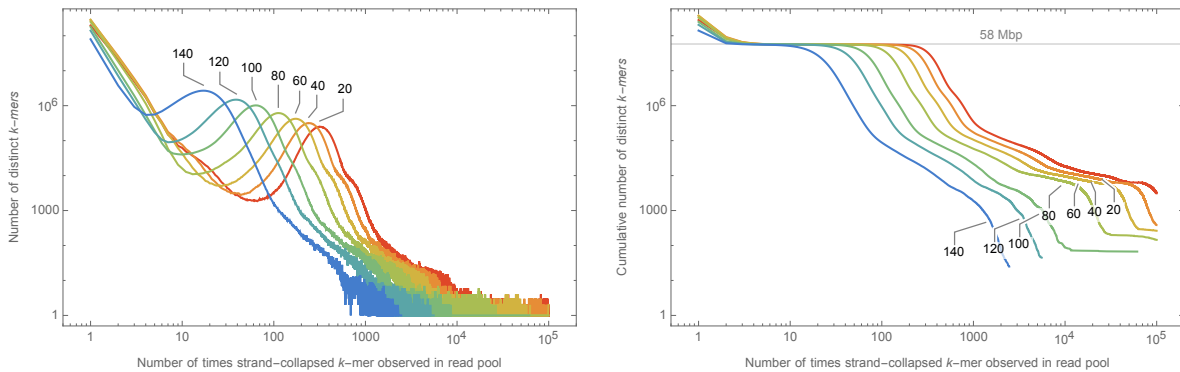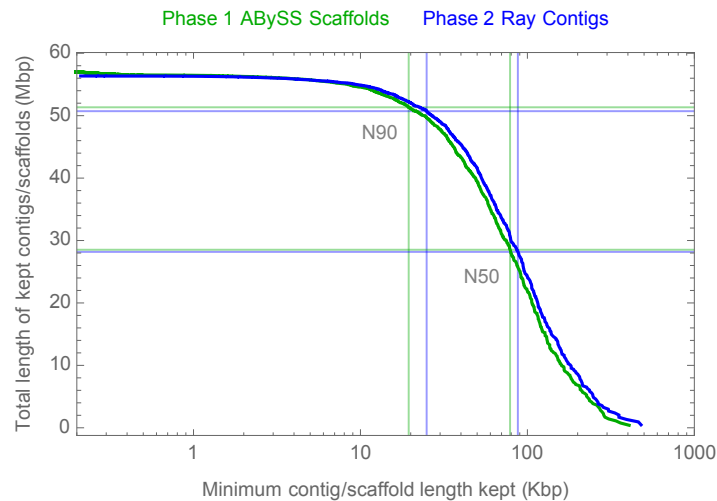

The main automated draft assembly used in the first years of the project (“Phase 1”) was an ABySS  $k=95$  “gene-space” one on the prepared Illumina reads consisting of 3,513 scaffolds with longest ~407 Kbp, N50 ~79 Kbp, N90 ~19 Kbp, L50=217, and L90=754. This assembly guided further decisions (e.g., use of optical mapping and with BamHI) and was the point at which downstream analyses such as gene prediction began. Because Phase 1 contigs were slightly shorter than needed for high-likelihood automatic optical map placement, in Phase 2 additional assemblers were tried in an effort to find a slightly better automated base; a Ray  $k=51$  “gene-space” one on the prepared Illumina reads consisting of 1,335 contigs with longest ~479 Kbp, N50 ~88 Kbp, N90 ~25 Kbp, L50=193, and L90=652 was chosen.

### Nuclear assembly Phase 3: optical map and chromosome-level scaffolding, joining, filling

OpGen, Inc. was contracted to construct an “optical map” of *Chromochloris* by imaging immobilized complete restriction digests of linearly-combed large molecular weight pieces (“hunks”) of genomic DNA we provided. Based on Phase 1, they chose BamHI (G|GATCC) as digest enzyme due to the range of predicted fragment lengths being mostly accessible to their technology. They ran 12 high-density MapCards to obtain approximate fragment length fingerprints for ~318K hunks, which they assembled into 19 maptig chromosomes of total size ~58 Mbp whose constituents are not A/C/G/T nucleotide calls, but approximate fragment lengths under complete BamHI digestion (Datasets S6–S7). (As they omit all small maptigs, chloroplast and mitochondrion do not appear.) The final nuclear genome nucleotide sequences described in this work — the “ChrZofV5” ver. 5 assembly (Datasets S1–S3) that Phase 4 (described later) ends with — adopt chromosome numbering and ‘+’ strand decisions from this optical assembly.

During optical assembly, hunk fingerprints are piled up in multiple alignments with typical coverage of several dozens; chromosome ends are manifest as consensus locations beyond which hunk fingerprints do not extend (up to uncertainty in optically-estimated fragment lengths). OpGen observed both ends of all chromosomes except the right end of chromosome 5, the tail of which assembled into an approximate optical inverted repeat that, as discussed further later, likely is just the beginning of a much longer true sequence inverted repeat. (Due to this, the optical length of chromosome 5 is likely underestimated by ~0.56 Mbp and chromosome numbering does not reflect true size largest to smallest.)

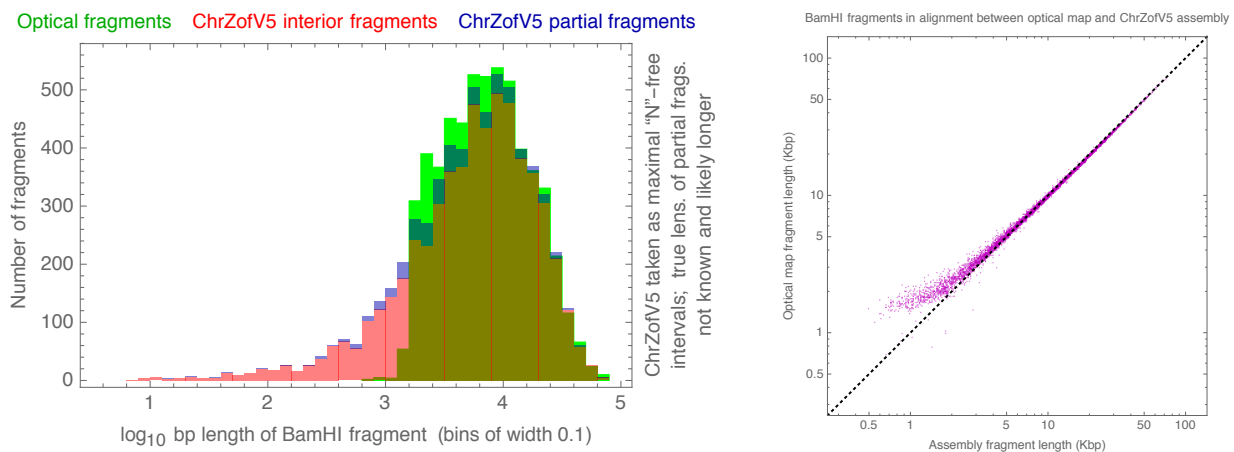

OpGen’s MapSolver software visualizes the optical map and aligns sequence contigs/scaffolds to it. (A degree of mismatch is allowed due to optical length uncertainty, the tendency of small fragments to be lost optically, and the possibility of small basecall sequence errors creating or deleting cutsites.) Experience suggests a contig/scaffold needs  $\geq 5$  interior fragments of non-small length ( $\geq \approx 2$  Kbp) for MapSolver to have a reasonable probability of placing it. This translates into a wide variety of contig/scaffold lengths due to *Chromochloris* BamHI fragment size variation, and Phase 1 scaffolds were often near this threshold with only ~12% covering ~37.6 Mbp being automatically placeable, even allowing non-unique placements and multiple coverage; the slightly longer contigs of Phase 2 improved to ~29% covering ~38.2 Mbp. However, by Phase 4’s end with extensive hand work, ~93% of the optical map was uniquely covered (see main text Fig. 2) with just a single sequence scaffold per optical chromosome.

Most automated assemblers have as a design goal to be conservative, in that they would prefer to give a more fragmented result (which could be pasted together in an unknown way to get “truth”) rather than one with mis-assemblies (in which some contigs/scaffolds would need to be taken apart before pasting could arrive at truth). Consistent with this, only a handful of Phase 1/2 scaffolds/contigs were found to be mis-assemblies via alignment to the optical map, increasing confidence that base sequence at finer resolution than the optical map was generally correct.

The per-chromosome single sequence scaffolds were formed from iterative rounds of optical placements of smaller subsequences (longer and longer as hand work proceeded), with the optical map providing global, externally-validated subsequence ordering and strand orientations and enabling approximate but accurately-sized N-filled gaps among subsequences and chromosome edges. Placements that resulted in overlapping or touching subsequences up to optical length uncertainty were, e.g., inspected at the sequence level for nucleotide overlap agreement of shorter lengths than automatic assemblers might otherwise require; reads and read pairs (including Pacific Biosystems long reads once Phase 4 began) touching and spanning gaps were isolated; and ambiguous placements could sometimes be resolved in favor of those not covering already well-covered parts of the optical map.

The optical map was intensely useful: as hand work proceeded, speculative contig joins and extensions that would have been dangerous — likely forming mis-assemblies if too many were relied upon, especially in succession — became reliable, as once further BamHI sites were reached, independent verification by the optical map was attained and possibilities were eliminated. Similar to the physical maps used in model organism projects, the optical map provided a global ground truth and acted as a ratchet for making positive progress that kept hand work from compounding mistakes. The flavor became much like a jigsaw puzzle, with each additional placement generally making other placements easier, as one could focus on gaps and not only were gaps getting fewer and smaller, but the pile of contigs, scaffolds, and reads to fill them with was also shrinking. Sources for speculation included: alignments of contigs and scaffolds to themselves; re-alignments of reads and read pairs to contigs and scaffolds; and, most importantly, the Pacific Biosciences long reads of Phase 4. Consensuses of supporting evidence spanning gaps was used to fill gaps; in some cases, these gap fills are of low quality (e.g., naked single-read PacBio sequence) but it was felt that — as long as the evidence supporting the join was substantial — it was better to provide some representative sequence and close gaps rather than fret for first public release over every basepair being absolutely certain.

#### **Nuclear assembly Phase 4: Pacific Biosciences reads, contig joining, and gap filling**

Numerous barriers in the draft assemblies evidently arose from the use of only short, paired end Illumina reads. Many difficulties were near repetitive sequence, either: (1) non-short segments of moderate/high entropy DNA that occur multiple times in the genome; or (2) low entropy DNA (e.g., microsatellites), these being trouble because of either (a) ambiguous continuations due to only having short reads, or (b) coverage collapse of multiple orders of magnitude (even so far as to completely deplete our nearly half-a-thousand-fold average coverage). Difficulties of type (2b) were common at points of very high G+C content as short as a dozen or two basepairs (as has been the authors’ experience on other projects with the Illumina platform), and there appear to be many such loci in this genome (ChrZofV5 has 191 clusters of G+C runs of length  $\geq 24$  nt).

To overcome some of these obstacles and better scaffold subsequences, four 75 fps 3 h PacBio RS-II/Springfield 1.1 runs of genomic DNA with BluePippin selection were performed at the DNA Sequencing & Genotyping Center of the Delaware Biotechnology Institute to obtain long reads, but of relatively low quality. Each SMRT cell contained 163,482 ZMWs (“wells”). Of wells with  $\geq 1$  insert called by the PacBio basecaller,  $\sim 94\%$  had only a single insert; hence, only a single longest interval per well was retained from the intersection of the “insert” and “HQ” regions, and no circular consensus were made. The result was 149,364 “subreads” (from  $\sim 30\%$  of wells) of 12 nt to  $\sim 34$  Knt (median  $\sim 3.1$  Knt) of total length  $\sim 692$  Mbp.

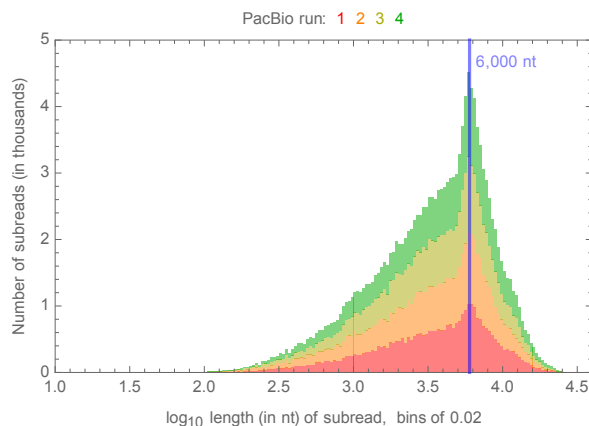

As usual, per-base error rates were estimated by the PacBio basecaller as very high compared to Illumina reads and as mostly indels rather than substitutions. No subread basecalls were given combined substitute/insert/delete/merge Phred qualities  $\geq 15$  ( $\sim 3\%$  chance of error or better), the mode was Phred 13 ( $\sim 5\%$  error),  $\sim 25\%$  had Phred quality 0 to 7 ( $\sim 20\%$  to  $\sim 100\%$  error), and the average chance of error per base was  $\sim 18\%$ . Hence, pre-correction alignments of subreads to assemblies used PacBio-aware BLASR. While each default 12-mer seed only has  $\approx 9\%$  chance of being uncorrupted, queries  $\geq \approx 220$  nt long have estimated chance  $\geq \approx 99\%$  of  $\geq 1$  uncorrupted seed. Most BLASR parameters were left at defaults, but filtering was lowered to impose no minimum read/subread length and no percent identity requirement, and best alignments per query was raised to 250 internal and 100 emit as (1) the shortest target contigs were  $\approx 200$  bp and longest PacBio reads  $\approx 50x$  longer; and (2) alignments descending into false positives were desired so that their statistics could be inferred from their great numbers.

From histograms of query and target alignment spans, a threshold of  $\geq 140$  nt was chosen for both spans to separate most true hits from very short false positives as well as short sequences repetitively occurring in *Chromochloris*, resulting in  $\approx 0.5M$  alignments. (Repetitive sequences of longer lengths remained; pre-alignment masking by tandem repeat finder TRF was sometimes used to help.) In subreads with  $\geq 1$  alignment,  $\sim 88\%$  /  $\sim 7\%$  /  $\sim 5\%$  of PacBio bases on average participated in exactly one / zero / multiple alignments. For draft contigs participating in  $\geq 1$  alignment, mode coverage by PacBio bases was typically 8, with  $\approx 0.1\%$  /  $\approx 0.6\%$  /  $\approx 97\%$  of bases uncovered / covered exactly once / covered 2 to 23 times. PacBio reads did not show nearly as much coverage variation across sequence the Illumina platform found difficult (e.g., at runs of G+C's). The top alignment by BLASR score per subread was enriched for near-full length alignment span on the query. Once organelle genomes became available (discussed later), estimates put  $\approx 0.1\%$  /  $\approx 0.2\%$  of aligning subreads as mitochondrion / chloroplast.

PacBio subread alignments were repeatedly used to help make assembly subsequence joins and to fill gaps as mentioned in Phase 3. A typical pass began by extrapolation of the unaligned ends of each aligned subread by the average compression/expansion ratio from indels in the aligned portions. Extrapolations might (“overhang”) or might not extend beyond a subsequence’s boundary, but overhangs of  $\geq 1$  Knt were not uncommon and, similar to earlier filtering, those of  $\geq 140$  nt were deemed “interesting”. Based on histograms of distance of alignment starts and stops to subsequence edges for subreads with interesting overhangs, it was decided to consider alignment starts and stops within 9 bp of a subsequence’s edge as having reached the edge. A subread alignment with an interesting overhang to a subsequence was considered “linkable” if it reached the same end of the subsequence (both ends for those with interesting overhangs on both ends). Subreads with a single linkable alignment on each end and to different subsequences on each end were declared “linking”; each of these suggests a merging of two subsequences with a particular relative distance and orientation with explicit sequence to fill any gap. Suggested merges from linking subreads were collected into a directed graph (that was typically enriched for linear paths) and evidence weighed at nodes with multiple incident arcs to determine if one arc had much more support (e.g., 6-fold more) than others, in which case only the dominant arc was retained and otherwise all arcs removed. The resulting directed graph of linear chains provides a round of up to a few hundred tentative assembly subsequence joins and gap fills to participate in the hand work process discussed in Phase 3. It was always satisfying to merge two or several subsequences into a subsequence large enough that optical placement became probable, and then finding the new subsequence had a unique optical placement that perfectly filled a hole in existing placements.

Using the pool of prepared but unassembled Illumina short reads as reference, the Proovread error corrector was also run on PacBio reads from three of the SMRT cells to obtain 83,069 polished trimmed reads of total length  $\sim 292$  Mnt whose lengths were primarily between 500 nt and  $\sim 21$  Knt (median  $\sim 3.0$  Knt), with almost all bases explicit A/C/G/Ts (rare isolated Ns) and almost all per-base Phred-scale quality scores  $\geq 19$  ( $\approx 1$  in 79 chance of error or better). These were very useful, as they enabled use of non-PacBio-aware tools (BLAST, ...) to query and manipulate the long read dataset, and were used both in ways similar to the uncorrected reads (e.g., in procedures like the previous paragraph) as well as more targeted questions that arose once two subsequences were placed near each other on the optical map. (During operations such as subsequence joining, the larger pile of untrimmed corrected reads also produced by Proovread was queried as well; in certain cases, this was the only way to make progress and gap fill exposes naked single-read PacBio sequence.)

Periodically, and one last time at the end of Phase 4, prepared Illumina reads not aligning to the working assembly were re-*de novo* assembled to maintain an accurate pool of unplaced contigs/scaffolds. Only those of length  $\geq 1$  Kbp with less than one third of their 31-mers already represented were retained for the final chrUn##### unplaced contigs/scaffolds in the ChrZofV5 assembly release. To simplify naming, a few had a small number of Ns suffixed to make all their lengths unique.

As an example of the progress made during hand work, the top of the next page shows snapshots of chromosome 3 optical placements at four intermediate stages, from near the beginning of Phase 3 to near the conclusion of Phase 4.



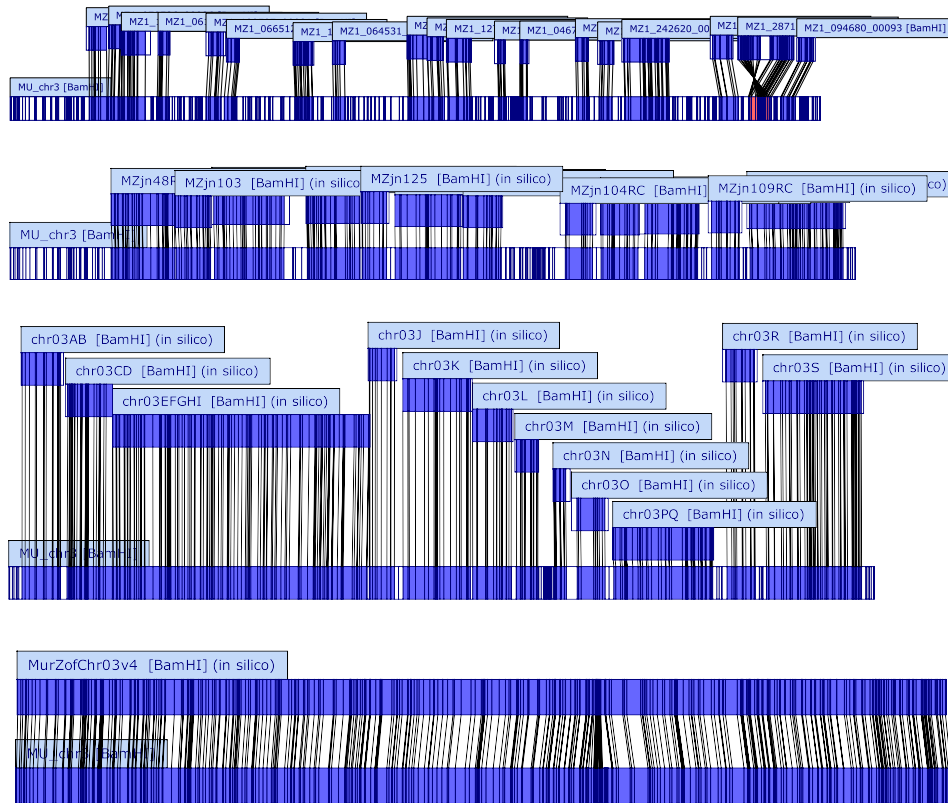

## Overall structure of the nuclear genome

**Telomeres.** As Phases 3 and 4 progressed and chromosome-level contigs/scaffolds approached optical ends of a chromosome, junctions with telomere repeats became apparent, and efforts were made (returning to Illumina and PacBio reads as necessary) to extend all sequences near such junctions at least partially beyond the junctions. As evident from chromosomes 1–4, 6–9, 13, 15, and 18–19 of the final ChrZofV5 assembly, the canonical *Chromochloris* telomeric repeat is apparently  $(CCCTAAA)_n$  at 5'-ends of chromosome strands, and from chromosomes 1–3, 6, 8–11, 14–17, and 19 is  $(TTTAGGG)_n$ , the reverse complement, at 3'-ends. From examination of edges of assembly sequences from the algal genomes of Table S1, *Coccomyxa* and *Chlorella* and possibly *Monoraphidium* are the same as *Chromochloris*, although *Chlamydomonas* appears to use  $(CCCTAAAA)_n$  and  $(TTTTAGGG)_n$ . In *Chromochloris*, commonly observed non-canonical units are  $(CCTAAAA)_n$  and  $(CCCTGAA)_n$  near 5'-ends, and  $(TTTTAGG)_n$  and  $(TTCAGGG)_n$  near 3'-ends.

A prepared pool of Illumina reads was aligned with Bowtie2 in single end mode keeping top hit only to the ChrZofV5 assembly with PhiX; parameters were end-to-end “--sensitive” defaults, which allow short indels and up to ~10% mismatches. Total pool nucleotides aligning to nuclear components was ~26.8 Gnt, and the total size of pool members with  $\geq 2$  adjacent copies (not necessarily the same) of TAAACCC, TAAACC, or TGAACCC or  $\geq 2$  adjacent copies (not necessarily the same) of AGGGTTT, AGGTTT, or AGGGTTC was ~62 Mnt. As the nuclear genome is  $\approx 57$  Mbp, this suggests *Chromochloris* telomeres total  $\approx 133$  Kbp ( $\approx 3.5$  Kbp/end).



The beginning (relative to nominal ‘+’ strands) of chromosomes 5, 10–12, 14, and 16–17 and the end of chromosomes 4–5, 7, 12–13, and 18 were not reached in ChrZofV5. However, the presence of repeat units suggests that unplaced contigs chrUn97886, chrUn83064, chrUn12635, and chrUn01845 and possibly chrUn07087, chrUn06996, and chrUn06817 involve 5'-end telomeric junctions; and chrUn10942, chrUn10872, and chrUn03315 and possibly chrUn57207 involve 3'-end telomeric junctions.

**Centromeres.** From experience with difficult sequence and gaps from Phases 3/4, candidate loci for centromeres (or, more likely, pericentromeric repetitive sequences surrounding them) were known for several chromosomes. For an unbiased scan, a visual examination was made of the whole genome distribution of each common TRF canonical tandem repeat unit. Focusing on units tending to concentrate in at most one zone per chromosome, iterative examination of sequence in and near these zones (by dotplots, BLASTing, local reassembly, and visualization of genome-wide occurrences) led to an expanding collection of putatively centromere-associated sequences; these were consistent with candidate locations. The collection converged on “ChrZofCen” (given later), a single circular ~4 Kbp Type 1/Copia LTR retrotransposon with ~0.7 Kbp spacer, together with TRF canonical units AAACATCTAG, AATCTGTGGTAGG, AAACATCTAGACACATCTAG, and AAACATCTAGACACATCTGG, with some 5S rDNA sequence.

The plot below outlines chromosomes in gray; the *x*-axis is Mbp along ‘+’ strands. Major assembly gaps (blocks of Ns) are shaded light gray. Thicker segments outlined in black indicate the putative (peri)centromeric intervals given in the table on the next page. Red, orange, yellow, and green dots near top edges of chromosomes show TRF tandem repeats for canonical units AAACATCTAG, AATCTGTGGTAGG, AAACATCTAGACACATCTAG, and AAACATCTAGACACATCTGG, respectively. Purple dots show runs of consecutive hits to 19-mers of either strand of all IUPAC-ambiguity and curly brace expansions of ChrZofCen; vertical height within bounds of outlined chromosomes indicates number of consecutive hits, linearly from zero at the bottom of outlines to 1,594 (the maximum observed) just below the level at which green dots are shown.

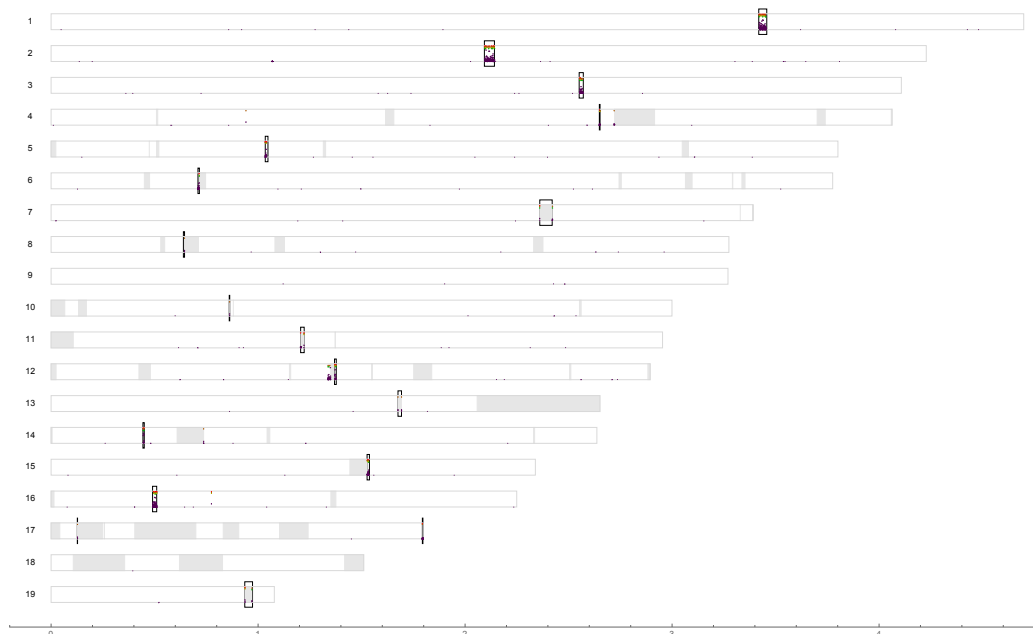

| <i>Chr-om.</i> | <i>Start ('+' strand, bp)</i> | <i>End ('+' strand, bp)</i> | <i>Nominal width (Kbp)</i> | <i>Comments</i>                                                                 |
|----------------|-------------------------------|-----------------------------|----------------------------|---------------------------------------------------------------------------------|
| 1              | ≈3,418,656                    | ≈3,457,392                  | ≈39                        | strong                                                                          |
| 2              | 2,093,247                     | 2,141,774                   | 49                         | strong, extra at 1,065,500–1,069,989                                            |
| 3              | 2,551,134                     | 2,571,108                   | 20                         | strong                                                                          |
| 4              | 2,648,641                     | 2,651,949                   | 3                          | possibly 2,719,643–2,722,347 (with asm. gap after) or 937,962–943,022           |
| 5              | 1,034,650                     | 1,047,659                   | 13                         | strong                                                                          |
| 6              | 709,495                       | 716,341                     | 7                          | strong, with assembly gap after                                                 |
| 7              | 2,360,779                     | 2,420,790                   | 60                         | weak, with assembly gap inside                                                  |
| 8              | 639,124                       | 644,655                     | 6                          | weak, with assembly gap after                                                   |
| 9              | in a gap                      | in a gap                    | ?                          | no good candidates even though no large assembly gaps on this chrom.            |
| 10             | 860,629                       | 862,963                     | 2                          | weak                                                                            |
| 11             | 1,205,545                     | 1,222,695                   | 17                         | strong, with assembly gap inside                                                |
| 12             | 1,369,284                     | 1,377,652                   | 8                          | strong, with assembly gap inside                                                |
| 13             | 1,675,799                     | 1,692,810                   | 17                         | weak, with assembly gap inside; chromosome has large assembly gap               |
| 14             | 443,632                       | 450,078                     | 6                          | possibly 736,796–739,088 (with assembly gap before)                             |
| 15             | 1,526,503                     | 1,537,899                   | 11                         | strong, with assembly gap before                                                |
| 16             | 490,261                       | 510,147                     | 20                         | strong, extra at 772,237–776,289                                                |
| 17             | 1,793,652<br>or 126,717       | 1,796,217<br>or 127,771     | 3<br>or 1                  | first option is at end of chrom., second with asm. gap after; 5 large asm. gaps |
| 18             | in a gap                      | in a gap                    | ?                          | no good candidates; chromosome has three large assembly gaps                    |
| 19             | 935,605                       | 973,134                     | 38                         | weak, with assembly gap inside                                                  |

There are 39 unplaced contigs likely containing (peri)centromeric fragments: chrUn{42003, 22516, 18154, 16591, 13058, 12366, 09183, 08437, 08040, 06312, 05306, 04914, 04275, 04018, 03492, 03384, 03059, 03028, 02729, 02724, 02655, 02649, 02593, 02484, 02398, 02352, 02284, 02246, 02034, 01939, 01933, 01883, 01678, 01641, 01499, 01429, 01415, 01238, 01183}.

ChrZofCen (with IUPAC ambiguous nucleotides and ‘{*option*<sub>1</sub>, *option*<sub>2</sub>, ...}’ curly braces capturing the most common variations observed) consists of the following coding portion (which, in all expansions, starts and ends on a codon boundary with ATG and TAA):

```
ATGACAGAACTGGAGAAGCTGGGTATCCCArACTkAACGACCACAACACTATGTCTTCTGGCACATCAAGATGCGAGCCTACCTyGTTGCAAGAGGAT
ACAGCGCAGCAATAACGAACGCAGAAGACGCCAACAGTGACAAGGCTCTTGCTTCCATCACTTTGGCTGTGGAAGATCATTCTTCTACCTACAGTrTA
CAAwGCTGCAAGTGCAGGACGCATGGGACGCGCTGGAGGCGTTGTTTCAGCAGCGAGCGTTGCCAACCAAGCTGAACCTCACGCAGGAACCTGAAC
AACCTCACACTGCAGCCTGGGGAGACCATCACACAGCTACTTGGCTCGTGCCAGAATCATATGGGAGCAGCTTAAGGCAGCTGGTATCGACAAGTCAG
AGCAGGAGGTGGCGTTATCAGTGTGTGTCAGGACTTCCGCGACTTCAACACCTTAGTGACAGTACTACAGAATCAGTCTGGTCmCTyACyCTGrG
TGGCATCCAGAAGGCTGTCTTGACAGAACGCAACGTGCAAAATAAGGTTGGGCATCAACGCTACTGCAGCAGCAGCAACCAAGGCTTTCTACACTCAG
AACGGTCCCAACCrTGGCArGCTTGGTGACAGCGGTACCAGGACCAAGCAACTT{ , CAACCAGGGGAACrG}CAACACCAAGCAGCAGGAGCAGCGTA
AGTGCTACTACTGTGGCAAGAAGGGGCACCTGAAAAGGGACTGCAGAAAGAAGAAGGCAGACGAGCAGCGTGGCCCCAGTACCAGGCTTCAACAAC
AATGGCATGGACTGCAGCCTGCAACACCAGCATCAGCCTCAGCTCAGGTACCTGGGTCCTCGACTCTGGAGCATCAAGACACGCTCTGCAAAAGAACGC
AGCCTGATGCAGAACCTGCAACAGCTGAACAGCCAGTCTACATCAGTACGGCAACGGTAGCACAGGGGTGGCACAGACTATGGGGGAGGTTGTTTC
TCAACGACAGGATCCGCTACGGAAACGTTTTGTTGATCCACTGCTGTTGGCAATCTCTTTCCATCCsTACAGCAGCTGCrYGTGGAGCACAGTT
```

TAAC TTTGsAGCCArTTGCTGCACCATTCGAGTAAATGGCAGACTGGTGGCAATAGCACAGCAGCAwGayGGTCACTAyTGCTTGCCTCTGAGCAw  
rCAsAGTCAGCCACTGCCTGGCAGCCAGACCCCGCAGCTGTGGCATTGCTGCTTTTGGCCATCTCAGCTACCAGAATATGGCCAAGGTCCCCAACT  
TGGTAACGGGGCTCCAAGTsCCAAC TGA rGCC TTT CAGGCAGCAGGT CAGCAGGTGTGTGAGCCATGTCTACTkGGCAACACAGACAGCAGCTGTCTTT  
CCCCGAGTCAGArACTGT CAGGCAGCAGyCACtkGA rCTGGTGCATATGGACCTCTGTGGACCTCTyCTGTCAAGTCACTTGGAGGCAGCCAGTAC  
ATGTGTACGTTCTCGGyGACTAyACAGGACTGTCAGTrGTGGCATTGCTCAAACAGAAAGTCAGACATTTCyAArGTGTGTGCCTGACGCTCTTCAACA  
TGCTAGAGAAACAGAGCAACAATCAGGTGAAGGGCTCCGCACTGACAACGGCGGGGAGTATGTCAACAATGTGmTGAACAGCTACTACAGCAGCAA  
GGC ATCATCGCACAGCACAGTACCATACAGTCTCAGCAGAATGGCAAGGACAGTCAACCGAACCTACTGGACAAGGCAGTCTCCATG  
CTGGCAGATGCArGGCTACCTTCTCAGCTrTGGGGTGAAGCCGTGGTAACAGCCAATTATCTTAGGAACCGTTACCAGCAGCTGGCAAGACAGCAA  
CACCTGGGAACGTGTTTTTGGGTACGGCCCTCTGTCTCTCATCTTGCCTGTTTGGGGCCAAAGGCTTTGCACAGATCCCCAAGGAGAAACGTGG  
CAAGCTGGACCAAGGAGT CAGCGTGGCATCATGGTTGGATATGAGCCyAATGTAAAGGGTACCCTACTGCTTCCAAACAACACCATCACAGTC  
AGCCGGGACGTTGTATTTGATGAAGGTGACCAGCCAGGACArTAGACACCAACTTCTATCCAGACTTGGAAAGATGAGCTTGATGTTACTGCAGCCA  
TCAACACTGGATCTAATGCAGCACCTTCTGTCAATACTTCTGGAACAGCTGAGCCACCACCATCAGTTGCAGCACCCGTCGACCCACCAATTTCCGGC  
ACAGACCATGGAAAACCTGGGAGCCAGCAACAGCTCAACACCACAGCAGyGAGGAAGATCAGCATCAGCAATCACGTAGAGAAGTACGGGGGGCCAC  
ATTGGCATGGCACCAGGCAACTACTGGGAGGCAACTACATCCCACATCCAAGCTACAGTACCGGACTGTGGCAGACAGATCAGAAATTTGTTG  
AGCCAGCAACCTATGAmGAAGCACTACAGTCAGACTGTGCAGAGCAGTGGCAGCAAGCCATGGACAGCGAGTACGCATCGCTGATAGCAATGGAAC  
TTGGACCTTGGAAAACCCCAACAGACATTAGGCCATCCCTGTCAAGTGGTGTATAAGGTGAAACGTGACACCAGCGGGAACATTGAGCGGTTTC  
AAGGCACGCTGTGGCCAAAGGGTTTTTGGCAACAGGAAGGTGTGGATATGACGAAGTGTTCGCCCCGTAAGCAAGTATGTACCTTTCCGGCAC  
TAATGGCCAAGCAGCAGAAGGACATGGAAC TACACAAATTTGGATGTCAAGACTGCTTCCCTCAAGGCAACCTGGAAGAAGATGTTGGATCCA  
GCAGCCTCGTGGCTACGAGGARGGCAGCAGTGAAC TmCCCTGTCTATwCAyAAACCTTTGTACGGGCTCAAGCAGGyCCTCGrGcWTTGGCATCAG  
CGCTACAAACAGGAAC TACTGGCAGTAGGCTACACAGCATCAGCAGCAGACCCAGCCTGTACTGGTACTGCATCAACGGGGACTATGTGTACTCTCC  
TGGTCTAyGTGGATGATATCTGATTGAGCCAAGCAGCTTGGAGTCAGTCAAGGCAGTCAAGCAGCAGCTrTTAGGCTTATTTGAGTCGCGTGACCT  
TGGAGAAGCwACATCCTTACCTTGGTATGAGCATTCAGCGCAACAGACAGCAGGCAyCATCAAGATyGGGCACCGACTCATGATCACAGAGTTACTG  
GARArGTATGGyGCAGTmGACAGCAAAATHAAGTCArTACCCTGTCTCCATCTATCAArCTrGcyAAAGATGAAGGCgryCCCCTAGACAAGGAAC  
ATTACCC TACAGCCAAC TGGTGGGAGTCTCATGTACTTGAATCACTCCAGGCCAGACCTCGCCTTTTCTGTGGGGGCTCTTGACGC TACAT  
GTCATGCCCAACCACwGTCCAyTGGCArGCAGCTAAGGGrTrCTACGCTACTTGGGAGGAACCCCTGGACTATGGCATCACCTTTGGTAGCGACAGC  
AATGACCTCATTGGCTACTGTGGCAGCAGACTATGCGGAGCAGACTAGCAGCAACAGCAGCAAGTCCACAGTGGCTACATATTCACTGAGTATATAAAA  
TyackTGGAGTAGTAAGCGCCAGGCAACAGTTGCAGCmTCAACCACGGAGGCTGAGTACATGGCAGCAGCAGCAGTCAAGGAAGCTCTATGGCT  
CGGTACACTCTTGTAGCGAGCTGCAGCTAGACATAGACAACATCACTATCATGGCAGACAACCAGTCAGCAATCAAGCTTCTCGGCAATCTCTATCTCA  
TCCATGAGAACCAAGCACATTGAYGTGGCTTATCACTTTGCTAGGGAACCGGTGGTGGCAAGGAGTGTGTTCAGTTTCAGTTCCACAGAGAACA  
TGTGGCAGACATCATGACCAAGGCTCTGAGCGAAGTCAAGCATGTGCGATGTTCAGAGGGCATGGGGTTGGAGTTTAA

followed by a more variable spacer region

AGAAACTTGAATGCGTGGGAGCATCTTTGACAGTACATGCCTGACTGCGTGGGAGTGTGAAATACGGCCTTTATTTCAGTCAGACCTGCCTGCCA  
GAATCCAGAAGTTGAGCATCTTTGACAGTACATGCCTGACTGCGTGGGAGTGTGAAATACGGCCTTTATTTCAGTCAGACCTGCCTGCCAAGTCC  
AGAACTTTCCAGATGGTCTGGAGyCCCAGATGTTTCyAGATGTTTCyArATGtKTCy{, AAATGTGTCC}{, AGAAGTTTCTAGAGGTGTCTAG  
ATGTTTCT}AGAATATGGTGCATGACAGTGTCAAGTCACTTTGTGGTr{, GTAGGAATCTGTG, GTAGGAATCTGTGGTAGGAATCTGTG}GTAGG  
AATCTGTGGTAGGAATCTGTGGTAGGAATCTGTGGTAGGATTTCCAGTAGGTGAACACAGTTGCCAGTGGATTGCCATTGTGCTGTGATATATAAA  
GACACAGACTTGTCCCAATCTGTAAYyTGTCCAGCCGAGySCACCCAGGCCCCACGCTTAAACACAGACCCGCAACACAGAGCTGAGGATACTGA  
GTCGCTAGAACGACTwAGrCAACAGATTTCCATCAGGTTATGGGCCCAc rCCACACGCACAATCGCTGTGTCTCAGAAATTTGTGTGTTCGGC  
CATAAGTGTGTGTACAGTTCTGTCArCmAGGTCACd

which then circles back to the beginning of the coding region. The Type 1/Copia LTR retro-transposal nature is clear from NCBI web conserved domain hits to its amino acid translation,

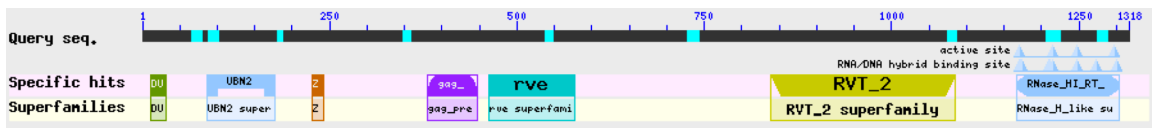

these being DUF4219 (a domain associated with the N-terminus of gag-pol proteins), UBN2 (gag of LTR Copia type), ZnF\_C2HC/zf-C2HC (zinc knuckle associated with retroviral gag), gag\_pre-integr (part of gag lying just upstream of integrase), rve (the integrase core domain), RVT\_2 (reverse transcriptase), and RNase\_HI\_RT\_Ty1 (RNase H for Type I/Copia LTR retroelements), in that order. NCBI web BLASTX had best hit to filamentous green alga *Klebsormidium flaccidum* with second best organism being colonial green alga *Volvox carteri*.

Due to the difficulty of assembling such large-unit repetitive sequence occurring in multiple tandem arrays (and reads suggest each array consists of complex nested insertions of mixed orientation with some divergence), ChrZofV5 in (peri)centromeres — even when given as gapless pure A/C/G/Ts — may have considerable errors. Almost all putative (peri)centromeric

intervals given in the table on the page before the last are associated with major assembly gaps and/or fine size differences between *in silico* BamHI fragment lengths and the optical map (with the assembly generally being too small; see also the discussion later about known assembly problems). However, borders and entry into pericentromeric sequences should be of quality comparable to the assembly generically, the optical map prevents massive errors (and constrains sizes), and sequence presently in ChrZofV5 should be representative. An estimate of the total size of (peri)centromeres was obtained in two ways. First, there is  $\approx 195$  Kbp of N-free sequence in the called intervals of the table and  $\approx 231$  Kbp of N-free sequence in the identified unplaced contigs/scaffolds (although all of such may not belong, as edges may be ordinary nuclear sequence), a total of  $\approx 426$  Kbp. Second, an analysis similar to that using Bowtie2 for the telomeric sequences (except selecting prepared Illumina reads as those having at least one 19-mer hit to either strand of all IUPAC-ambiguity and curly brace expansions of ChrZofCen or any rotation of (AAACATCTAG)<sub>2</sub>, (AATCTGTGGTAGG)<sub>2</sub>, AAACATCTAGACACATCTAG, or AAACATCTAGACACATCTGG) finds  $\approx 290$  Mnt of (peri)centromeric reads vs. the  $\sim 26.8$  Gnt of nuclear reads, suggesting total centromeric nuclear sequence of  $\approx 618$  Kbp. Thus, *Chromochloris* may have a total of  $\approx 0.5$  Mbp of (peri)centromere, an average of  $\approx 25$  Kbp per chromosome.

**Ribosomal DNA (rDNA).** The canonical rDNA repeat unit for *Chromochloris* became apparent early in assembly during analysis of *k*-mers observed with high frequency, and is given as contig chrRr. It assembled as a 9,702 bp circular consensus which RNAmmer (48) annotates as follows (the consensus was oriented so that annotations fall on the ‘+’ strand, and the de-circularizing linearization cut was placed just before the 28S rRNA annotation):

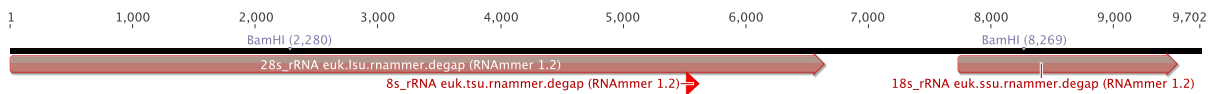

The plot below is similar to that shown earlier for centromeres, except there are no red, orange, yellow, or green dots formerly for various tandem repeats. Instead, purple shows length of consecutive hits to 19-mers of either strand of circular chrRr, with the top of chromosome outlines corresponding to maximum observed value 4,544.

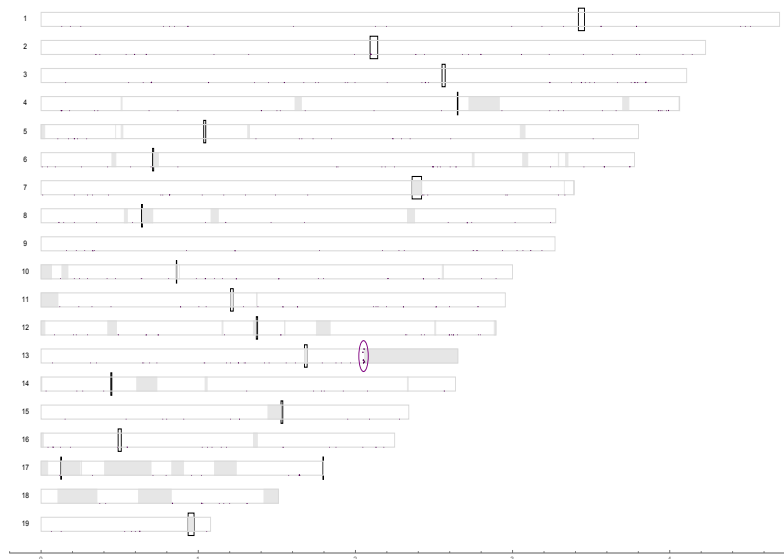

Typically, rDNA exists in at least one large tandem array; such sequence is, however, difficult to assemble. As with the (peri)centromeres, bordering sequence and entry into such regions is expected to be less problematic. From the plot, the tail of chromosome 13 (relative to its '+' strand) leads into a large assembly gap with rDNA sequence at the left border (indicated by purple oval). Further, the rDNA consensus contains two BamHI sites which, in circular form, produce fragments of sizes ~6.0 Kbp and ~3.7 Kbp that are both in the range in which the optical mapping worked well, and this region of chromosome 13 has an optical tandem repeat of  $\approx 24\times$  copies of an alternation of fragments  $\approx 6$  Kbp and  $\approx 4$  Kbp in size. This suggests that the large assembly gap at the end of chromosome 13, estimated to be  $\approx 593$  Kbp in size, begins with  $\approx 24\times$  copies of the rDNA unit (likely with divergence among copies); these copies would represent  $\approx 233$  Kbp or  $\approx 40\%$  of the gap. Various analyses (e.g., that of Table S1) assume this gap begins with  $24\times$  exact copies of chrRr.

**Repetitive sequence.** There are repetitive sequences beyond the telomeres, (peri)centromeres, and rDNA already discussed. The nuclear fraction of the ChrZofV5 assembly was analyzed with RepeatMasker 4.0.6open (using slow search and gccalc options with engine RMBlast+ 2.2.28) in combination with all of Repbase Update 2016-08-29 ("eukaryota") and *de novo* identified repeats from RepeatModeler 1.0.8open with RepeatScout 1.0.5, RECON 1.08, TRF 4.04, and RMBlast+ 2.2.28. About 6% of the assembly (excluding N-runs) was masked, mostly in interspersed repeats (~5.0% of sequence) as primarily LINES (~2.0%), LTRs (~1.5%), unclassified elements (~1.2%), and DNA elements (~0.4%). The remainder was mostly simple repeats (~1.0%), with some satellites, low complexity sequence, and small RNA (total ~0.1%).

On the next two pages are per-chromosome plots of repeat and gene density with *x*-axes giving Mbp along '+' strands being divided into overlapping bins of 50 Kbp every 10 Kbp, and *y*-axes indicating fraction of non-N basepairs annotated in various ways. Repeats are shown stacked with bottom to top being LINES (red), LTRs (orange), unclassified (yellow), simple (green), DNA elements (cyan), satellites (blue), RCs (magenta), low complexity sequence (gray), rRNA (dotted gray), tRNA (dotted black), and other/mixed class (black). Fraction of non-N basepairs annotated to the coding span of at least one ChrZofV5 gene model is given in brown. Major assembly gaps (large blocks of Ns) are shaded light gray and vertical black lines indicate putative (peri)centromeres discussed earlier.

Gene density is rather uniform, and there are no grand scale gradients in genes or repeats as found in, e.g., *Arabidopsis*, a genome approximately twice as large that has megabasepairs of pericentromeric heterochromatin (49). Some smaller scale gradients in repeats are found near (peri)centromeres and especially large assembly gaps (e.g., the large gaps of chromosomes 17 and 18). There are a few localized concentrations of particular kinds of repeats. As apparent from Table S1, *Chromochloris*, like *Coccomyxa*, has relatively few repeats compared to other algal genomes of comparable size (*Chlorella* or *Monoraphidium*) and much fewer than larger genomes (*Chlamydomonas* or *Arabidopsis*).

**Known assembly issues.** From the hand word and detailed comparison of the final ChrZofV5 assembly to the optical map, 100 areas where the assembly has issues are known. (These are in addition to a likely number of very localized errors, e.g., individual basepairs; assembly polishing by variant detection using re-aligned reads is pending for the next assembly release.)

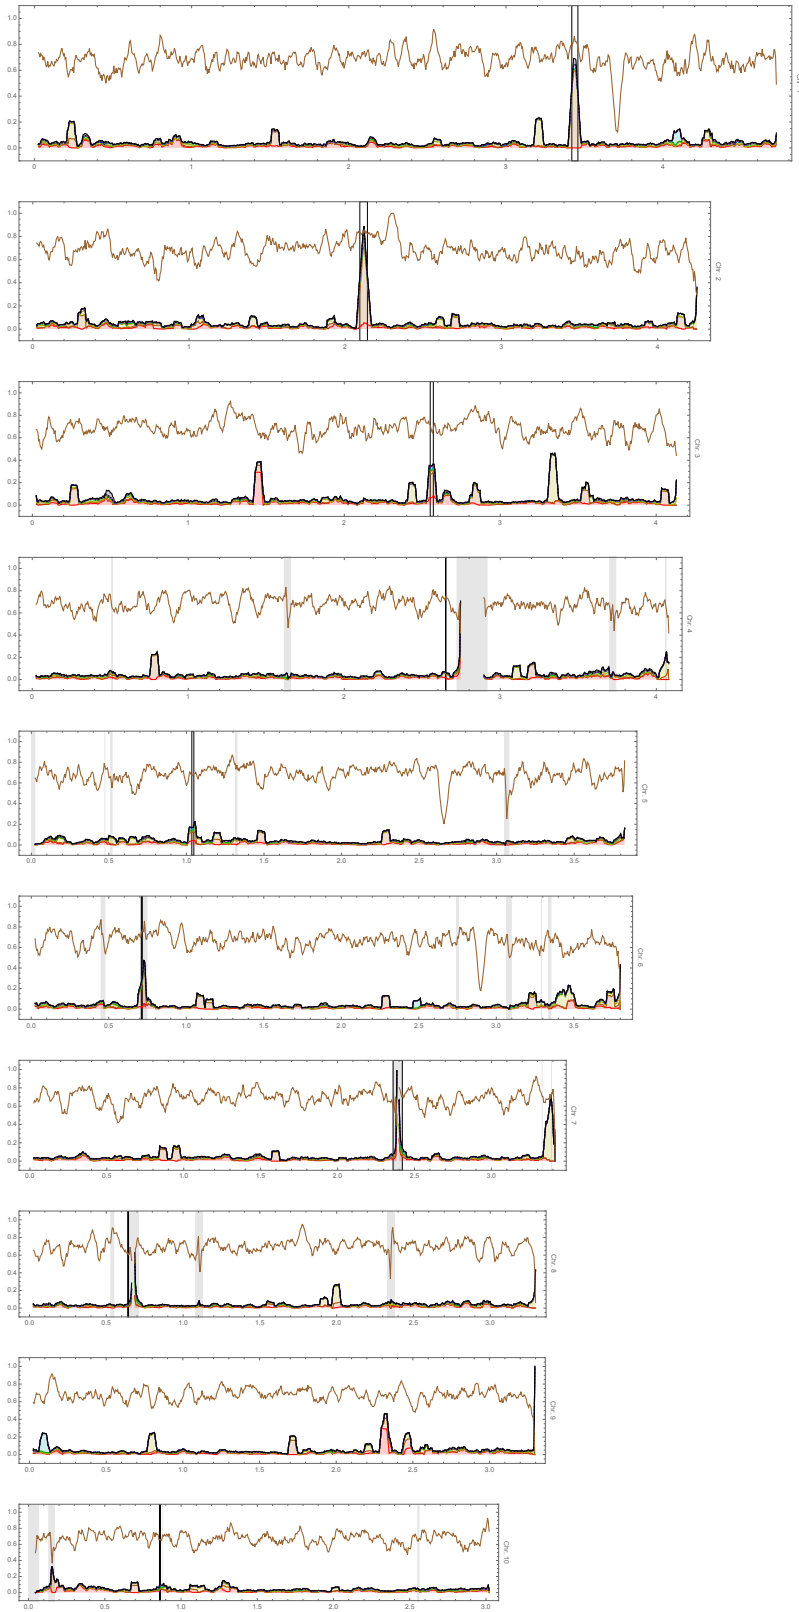

*Repeat and gene density: chromosomes 1–10 (see description on previous page)*

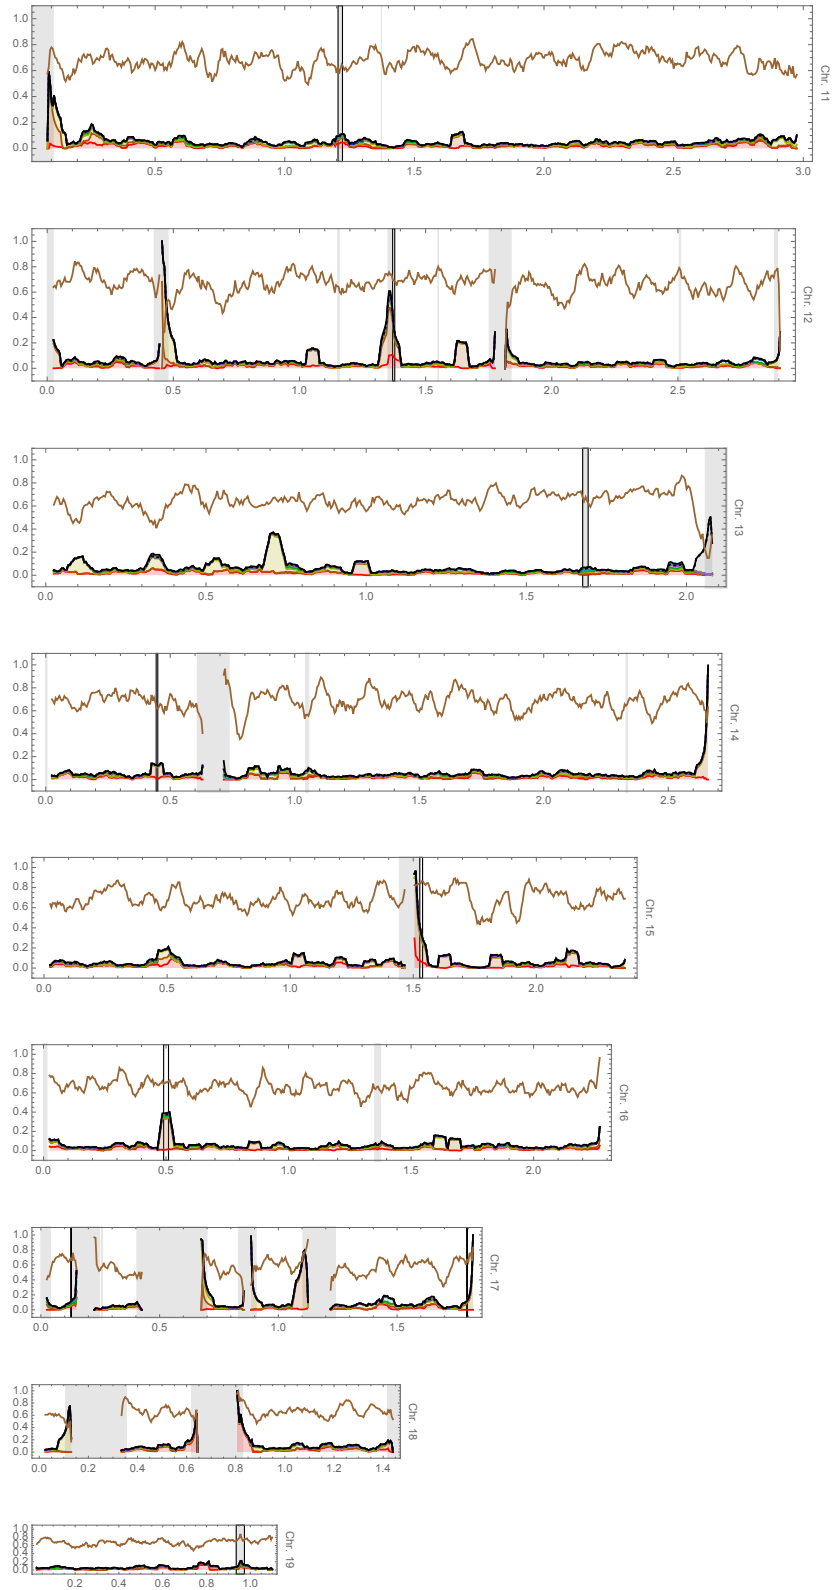

*Repeat and gene density: chromosomes 11–19 (see description for previous page)*





is placed and in tight agreement with the optical map. Although current data is not exhausted and additional refinements can be made, in the interest of timely availability to the community of the already high quality genome, the ChrZofV5 version is being publically released.

## Genomes of the chloroplast and mitochondrion

Assemblies of organelles took place between nuclear assembly phases and also required multiple hand-managed passes (as they were not assembled whole by any of the automatic processes). Various methods were used to identify potentially relevant contigs and reads, including relatively high coverage, low G+C content, alignments and synteny to existing NCBI chloroplast and mitochondrion sequences, and alignments to seed contigs once some were in hand.

**Mitochondrion.** The mitochondrion (for SAG 211-14, the strain of this study) was completely assembled as a single circular 41,733 bp contig *chrMt* with no IUPAC ambiguous nucleotides; the strand orientation and linearizing cut were chosen to agree with NCBI accession KJ806268.1, the 44,840 bp complete mitochondrion of *Chromochloris zofingiensis* strain UTEX 56. Annotation of protein-coding genes, tRNAs, and rRNAs of *chrMt* was by BLASTN/BLASTX and BLASTP to the NCBI 'nt' and 'nr' databases, tRNAscan-SE, RNAmmer, Rfam, syntenic alignments to closely related known sequences (e.g., to KJ806268.1), and visual examination of RNA-Seq alignments (which suggest some UTRs, although these were not kept in the final annotations). The overall structure of *chrMt* is highly similar to KJ806268.1, having the same major protein-coding genes, tRNAs, and rRNAs in the same order, however there is considerable divergence at the nucleotide level with a global pairwise alignment (Geneious 93% similarity cost matrix, gap open penalty 30, gap extension penalty 1; see figure on next page) only ~66% identical. Divergence is concentrated intergenically and the splicing structure of *rrnL4* is different. Globally aligning just the coding sequences results in ~98% nucleotide identity. Translating the coding sequences via NCBI genetic code #22 (the *Scenedesmus obliquus* Mitochondrial Code) and globally aligning (Geneious BLOSUM62, gap open penalty 12, gap extension penalty 3) estimates ~99% amino acid identity.

**Chloroplast.** Similarly, the chloroplast (for strain SAG 211-14) was completely assembled as a single circular 181,058 bp contig *chrCp*, also with no IUPAC ambiguous nucleotides; the strand orientation and linearizing cut were chosen to be in agreement with NCBI accession KT199251.1, the 188,935 bp complete chloroplast of *C. zofingiensis* strain UTEX 56. Again, annotation of protein-coding genes, tRNAs, and rRNAs was by BLASTN/BLASTX and BLASTP to NCBI 'nt'/'nr', tRNAscan-SE, RNAmmer, Rfam, syntenic alignments to closely related known sequences, and visual examination of RNA-Seq alignments (which again suggested some UTRs, although as before these were not kept in the final annotations). As with many chloroplast genomes, there is a large rRNA-related inverted repeat (~6.7 Kbp in SAG 211-14, ~6.4 Kbp in UTEX 56) separating two single copy regions. It is difficult to resolve the arms with short reads; they assembled as identical except for a tandem repeat CTTGGTATTGGGGC estimated as 8× in the first arm and 9× in the second (where SAG 211-14 inserts ~300 bp relative to UTEX 56). The relative strand orientation of the single copy regions is ambiguous, and no PacBio reads were found able to resolve this. The single copy regions were assembled in opposite relative strand orientation compared to KT199251.1, and so in further comparisons the second single copy region of KT199251.1 was reverse complemented.

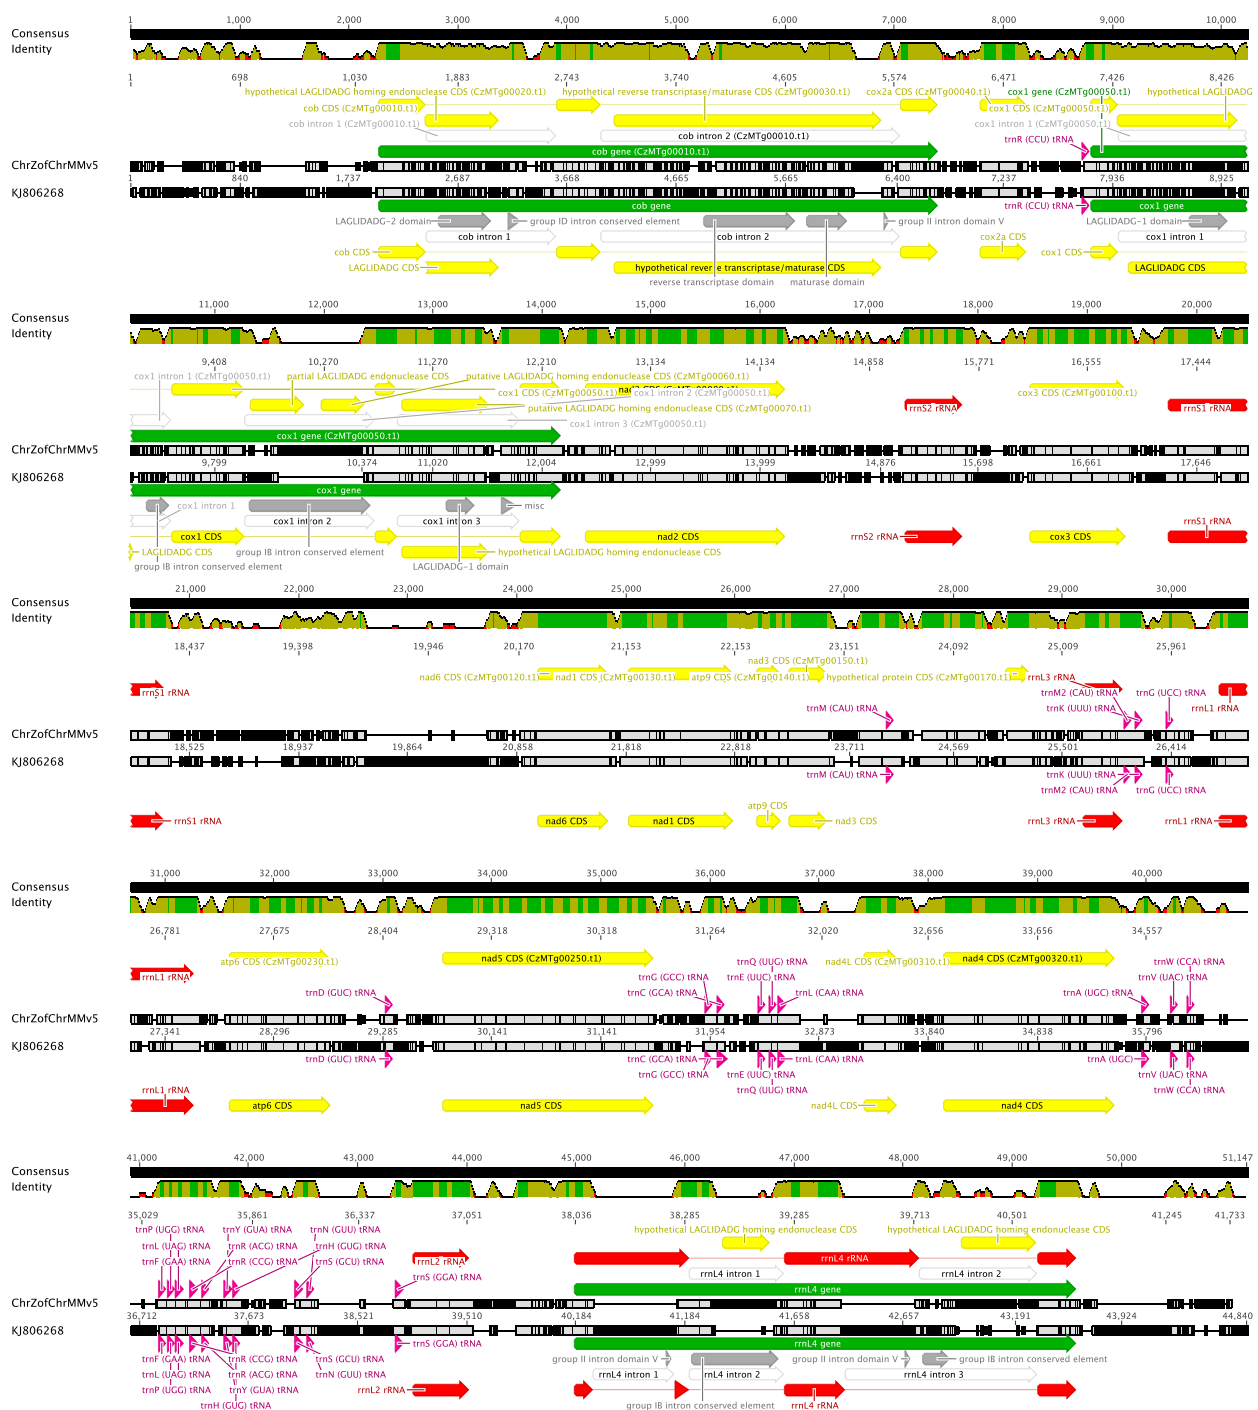

Global nucleotide alignment of mitochondrion genomes *chrMt* (*Chromochloris* strain SAG 211-14) and NCBI KJ806268.1 (*Chromochloris* strain UTEX 56); see discussion on previous page

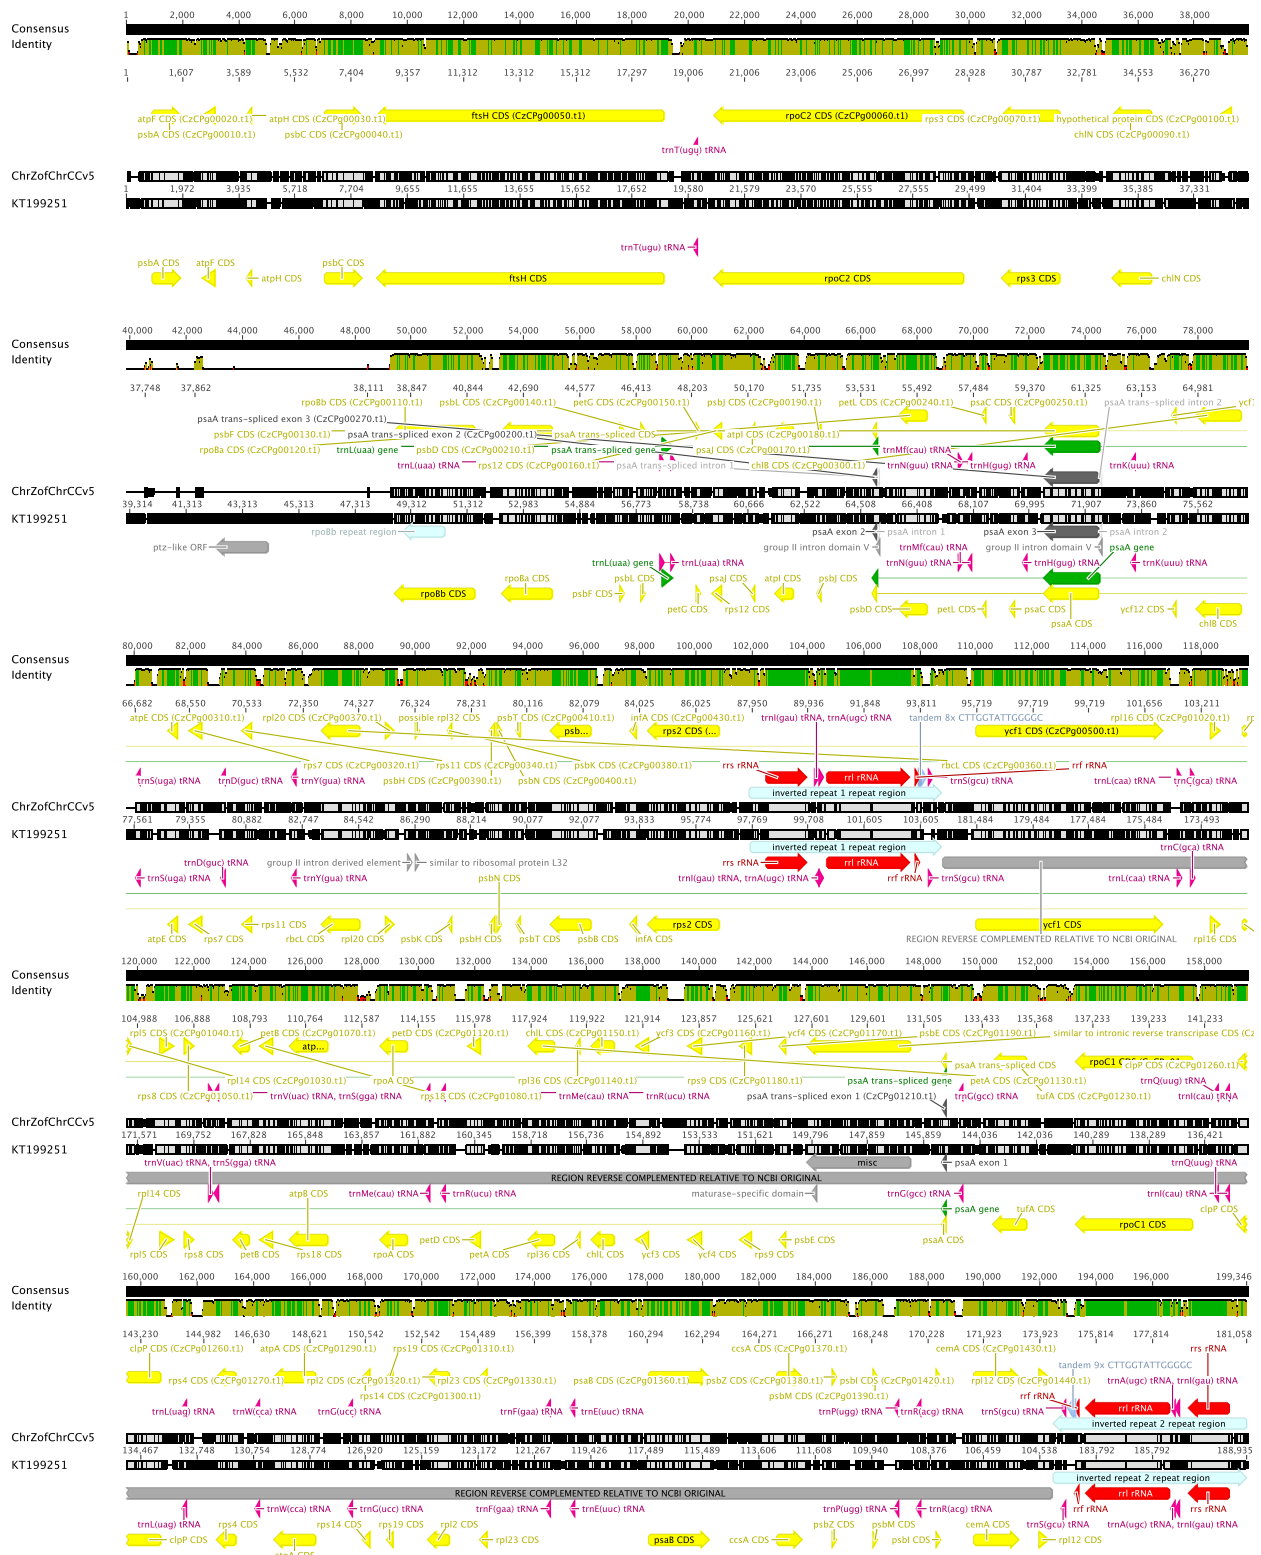

Global nucleotide alignment of chloroplast genomes *chrCp* (Chromochloris strain SAG 211-14) and NCBI KT199251.1 (Chromochloris strain UTEX 56); see discussion on next page

With the second single copy region of KT199251.1 reverse complemented, the overall structure of chrCp is highly similar to KT199251.1, with the major protein-coding genes, tRNAs, and rRNAs again in the same order. Aligning in the same way as with the mitochondrial genomes, global alignment gives overall nucleotide identity of ~83% and global alignment after restriction to coding sequences gives ~98%; divergence is again concentrated intergenically. The largest difference is the loss in SAG 211-14 of almost all of a ~9.3 Kbp region in UTEX 56 annotated as containing a ptz-like ORF. Translating the coding sequences via NCBI genetic code #11 (the Bacterial, Archaeal, and Plant Plastid Code) and globally aligning results in ~97% amino acid identity, with lower percent identity in the larger genes (e.g., *ftsH*, *rpoC2*, and *ycf1*). The gene *psaA* remains trans-spliced (with RNA-Seq in concurrence); an *in silico* effort to identify a homolog of the *Chlamydomonas tscA* gene involved in this process was unsuccessful.

From the Bowtie2-based analysis introduced in the telomere discussion earlier, coverage on chrMt and chrCp from prepared Illumina reads is  $\approx 1,280\times$  ( $\approx 0.2\%$  of sequencing effort) and  $\approx 890\times$  ( $\approx 0.6\%$ ), respectively. Coverage of PhiX is  $\approx 150,000\times$  ( $\approx 2.8\%$ ), and the nuclear genome (chromosomes, rDNA, and unplaceds) is  $\approx 460\times$  on average ( $\approx 93.9\%$ ). The remaining  $\approx 2.6\%$  of effort is in reads that did not align;  $\approx 1.5\%$  is accounted for in a re-alignment to Illumina inline controls, leaving  $\approx 1.1\%$  of effort unaligned. At nuclear coverage, this could be  $\approx 0.7$  Mbp of additional sequence, very close to the  $\approx 0.6$  Mbp more expected beyond current unplaced contigs/scaffolds as discussed under “Known assembly issues” above. The high fraction ( $\approx 98.9\%$ ) of original reads accounted for is encouraging; there is not much sequence missing from the ChrZofV5 assembly, even if it is not yet in perfectly contiguous form.

### Transcriptome assembly used in training AUGUSTUS

To assist with training the AUGUSTUS *ab initio* gene modeler for *Chromochloris*, a draft transcriptome was *de novo* assembled from the 151+151 nt pool of  $\sim 397$ M read pairs from the fourteen RNA-Seq sub-libraries described earlier, using the Ray assembler with  $k = 51$ . Such *de novo* transcriptome contigs are generally presented in random strand and codon frame, generally contain UTRs, and may contain introns (and many of large number of shorter, lower-coverage contigs may be wholly introns, and introns may change codon frame). To bootstrap AUGUSTUS, PASA 2.0.2 was used to extract a training set of genes (50).

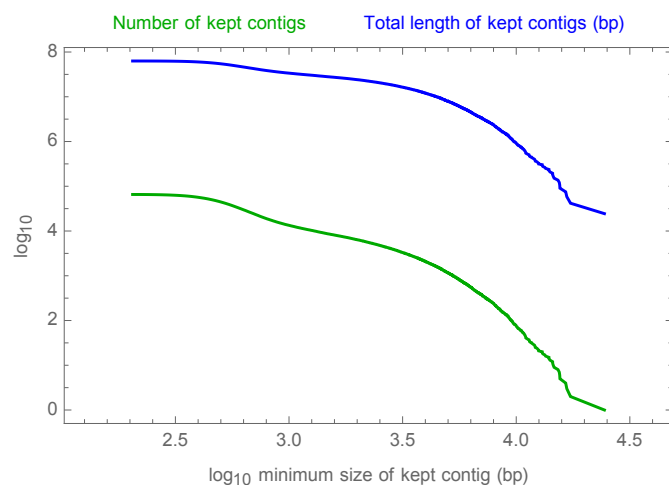

## Details of Table S1

*Nuclear genomes.* Sequences and annotations (especially those of model organisms) are often updated after initial publication, and details of definitions and statistical analyses can often greatly affect summaries. For these reasons, Table S1 was completed by analyzing freshly-downloaded current copies of reference genome sequences and gene models and uniformly applying the same criteria and methods to every organism rather than, e.g., copying nominal quantities from existing publications. Sources of nuclear genomes and annotations were TAIR10 for *Arabidopsis thaliana* (“AraTha”), JGI Phytozome 5.5 for *Chlamydomonas reinhardtii* (“ChlRei”), ChrZofV5 of this work (with 24× copies of the rDNA unit) for *Chromochloris zofingiensis* (“ChrZof”), JGI Phytozome 2.0 for *Coccomyxa subellipsoidea* C-169 (“CocSub”), JGI release 2014-08-18 with ‘best genes’ for *Chlorella* sp. NC64A (“Chlore”), and NCBI accessions KK100223.1–KK106940.1 for *Monoraphidium neglectum* (“MonNeg”).

*Sequenced genome size:* number of non-N/n bases in assembly (other IUPAC ambiguities were retained), rounded to nearest Mbp. *Sequenced genome presentation:* a “scaffold” is defined as a nucleotide sequence having at least one N/n (with other IUPAC ambiguities being irrelevant) and presuming every other sequence to be a “contig”. For *CocSub*, all sequences are called “scaffolds” in distributed files and chromosome vs. arm vs. unplaced is not indicated; however, the distinctions are clear from presence of telomere-associated repeats at one, both, or neither sequence edge, and the number of chromosomes plus half the number of arms as thus determined equals the stated 20 chromosomes in the associated genome paper (51), which also mentions that, via Southern, the pairing of half the arms was determined. *Genome project primary initial strategy, average basepair coverage at earliest stage:* per best evidence available and literature, including *CocSub* (51), *AraTha* (49), *ChlRei* (52), *Chlore* (53), and *MonNeg* (54).

*Scaffold N50 (taking genome size as sum of scaffolds as-are):* ordering scaffolds by decreasing size (and keeping all IUPAC ambiguous nucleotides), take scaffolds until total size is at least as large as half total size of all scaffolds, and report size of the smallest taken scaffold after rounding to the nearest Kbp. This was not performed for assemblies at chromosome/arm scale, as this quantity is then essentially as large as it can be and is controlled by the organism’s distribution of chromosome sizes and is no longer connected to assembly quality. *Contig N50 (taking genome size as sum of contigs as-are):* form “contigs” by splitting scaffolds at every N/n (tolerating other IUPAC ambiguities) and removing all N/ns; order contigs by decreasing size, take contigs until total size is at least as large as half total size of all contigs, and report size of the smallest taken contig after rounding to the nearest Kbp. *Number of chromosomes:* per best evidence available and literature. For *Chlore*, although not mentioned in the associated genome paper (53), the largest scaffolds are large and one can look for telomere-associated repeats; 11 of their scaffolds begin with such a repeat and 7 end with one (and none have both ends thus associated)... this is more or less consistent with the genome paper’s determination of 12 chromosomes by Pulsed-Field Gel Electrophoresis (PFGE), with chr. 12 being difficult.

Protein-coding genes are taken as those directly declared as such by the annotations; in cases (*MonNeg*) without a direct indication, a GFF file gene was taken as protein-coding if and only if it had non-empty intersection with at least one GFF file CDS interval. Three of the releases here (for *ChrZof*, *MonNeg*, and *CocSub*) do not provide multiple transcript models per gene

locus. (Although the *CocSub* release includes versions of files named so as to distinguish all models vs. “primary transcript only”, such versions are the same and no protein-coding locus is actually modeled with multiple isoforms.) For *AraTha*, when desired, the canonical transcript model for each gene locus is per TAIR’s file `TAIR10_representative_gene_models.gz`. For *ChlRei*, when desired, the canonical model is that marked `longest=1` in the annotation GFF files (and all GFF files in the release agree on this designation). For *Chlore*, there is no issue since the only gene models used in this work are those from the release’s ‘best genes’ files. Note that *MonNeg* is a highly fragmented assembly and one may expect (in agreement with the BUSCO analysis of main text Fig. 3A) its gene models to suffer due to, e.g., true coding sequences often reaching edges of assembly sequences; for this reason, numerous of its gene-related summary statistics may be more divergent from “truth” than for the other organisms.

*Percent G+C in sequenced genome*: using only A/C/G/T nucleotides (no IUPAC ambiguities) in an all-uppercase version of the assembly, report fraction  $(\# \text{ C+G}) / (\# \text{ A+C+G+T})$  as a percent, rounded to the nearest integer. *Basepairs called as coding (in any transcript model) in sequenced genome*: over all transcript models of all protein-coding genes, take union of coding sequence bases (ignoring strands) to get a target subset of assembly basepairs; restrict to the N/n-free fraction of this subset and the whole assembly (other IUPAC ambiguities being tolerated), and report percentage of the whole in the subset after rounding to the nearest integer. *Percent G+C in basepairs called as coding (in any transcript model)*: over all transcript models of all protein-coding genes, take union of coding sequence bases (ignoring strands) to get a target subset of assembly basepairs; using only A/C/G/T bases (no IUPAC ambiguities) in an all-uppercase version, report fraction  $(\# \text{ C+G}) / (\# \text{ A+C+G+T})$  as a percent, rounded to the nearest integer. *Number of “complete” called protein-coding gene loci (collapsing transcripts)*: same as the row “Number of called protein-coding gene loci (collapsing transcript forms)” except restricted to coding sequences that satisfy all of the following: (1) are pure A/C/G/T (i.e., contain no IUPAC ambiguities); (2) begin and end on codon boundaries; (3) start with ATG; (4) end with TAA/TAG/TGA; and (5) do not contain an internal TAA/TAG/TGA codon.

*Number of rDNA units estimated to exist in true monoploid genome*: *MonNeg* and *AraTha* are via (54) and (55); for *ChrZof*, this work as, e.g., already described in subsection *Ribosomal DNA (rDNA)*. For *ChlRei*, the original genome paper (52) contains some information but not quantitation. Seven paired-end 76+76 nt Illumina GA-II lanes of a *Chlamydomonas* genomic library were available from an unrelated project. Extremely high coverage 39-mers from the reads were *de novo* assembled, rDNA-related seed contigs selected via NCBI web BLASTN, paired-end reads having at least one 31-mer from the seed contigs and seen multiple times were extracted and re-*de novo* assembled to obtain a 6,543 bp consensus chunk of a presumed *Chlamydomonas* rDNA unit. The chunk contains a whole 18S followed by a whole 28S. Comparison of median Jellyfish 39-mer coverages for the consensus chunk of rDNA unit vs. some generic “1×” ordinary sequence in the nuclear genome (that N/n-free chunk of chr. 1 with length 440,320 bp, with a coverage threshold to remove empirically non-unique regions) provides an estimate of rDNA unit copy number as 840× (independent of the chunk’s tandem circle not being closed), and ~5.5 Mbp as a lower bound on total length (dependent on the fraction of the unit the chunk represents).

*Number of tRNAs called in sequenced genome:* counts are for all types (including with introns, unclassified, selenocysteine, and pseudo). For *AraTha*, the TAIR release contains explicit tRNA annotations, and the table entry ‘631’ counts these. For the other organisms, even though, e.g., the original genome papers generally discuss tRNAs (implying that predictions were made), the annotation releases do not identify tRNAs and so for this work *ab initio* scans with tRNAscan-SE 1.3.1 were performed with default parameters. (This scan finds 639 for *AraTha*.) For *MonNeg*, the *ab initio* scan found 38 in the nuclear genome, 29 in the chloroplast, and 23 in the mitochondrion, while the original genome paper (54) states “40 + 1× Pseudo Ser-tRNA” for nuclear, “29 + 1× Pseudo Leu-tRNA” for the chloroplast, and “21 + 1× Pseudo Met-tRNA” for the mitochondrion in its Table 3 but shows 23 in its Figure 5. For *ChlRei*, the ‘259’ shown in Table S1 is taken from the original genome paper (52), as even though the current JGI 5.5 release does not contain tRNA annotations, the original genome paper states that tRNAscan-SE is known to overestimate in *Chlamydomonas* due to tRNA-associated SINE retrotransposon elements; the *ab initio* scan predicts 353 tRNAs in the current nuclear assembly. Regarding *ChrZof*, the scan only identifies 75 tRNAs (Dataset S8) — more than *Chlore* and *MonNeg*, the small algal genomes of high G+C and moderate repeat content, and similar to *CocSub*, the other algal genome of moderate G+C and low repeat content, but much less than the relatively large genomes of *AraTha* and *ChlRei*; there are no large clusters, although there are runs of up to four on the same chromosome with spacing smaller than would be expected at random (e.g., with some adjacencies closer than 1 Kbp).

| Organism:                 | # selenocysteine: | # pseudo: | # undetermined: | missing std. AAs:  |
|---------------------------|-------------------|-----------|-----------------|--------------------|
| <i>CocSub</i>             | 0                 | 3         | 4               | none               |
| <i>ChrZof</i>             | 0                 | 0         | 0               | none               |
| <i>AraTha (ab initio)</i> | 0                 | 8         | 1               | none               |
| <i>ChlRei (ab initio)</i> | 1                 | 2         | 2               | none               |
| <i>Chlore</i>             | 1                 | 0         | 0               | Ile                |
| <i>MonNeg</i>             | 2                 | 1         | 1               | Asn, Glu, Trp, Tyr |

From the *ab initio* scans, all standard amino acids are covered for all six organisms, except for one in *Chlore* and four in *MonNeg*, perhaps because these are the most fragmented assemblies, or perhaps due to tRNAscan-SE misclassifications as selenocysteine/pseudo/undetermined (of which there are exactly one and four in *Chlore* and *MonNeg*, respectively). The phylogenetic profile of anticodons (ignoring predicted pseudogene status) is as follows: universal in all six = AGC, AGG, AGT, CAA, CAC, CAT, CGC, CTG, CTT, GAA, GCA, GCC, GTC, GTG, TCG; missing from all six = AAA, ACA, ACT, ATA, ATG, ATT, CTA, GAC, GCG, GGC, GGG, GGT, TTA; missing from just *MonNeg* = AAC, AAG, ACG, CAG, CCA, CGA, CGG, CTC, GTA, GTT, TAA, TGG; missing from *MonNeg* and *Chlore* = AAT, CCG, CCT, TAC, TCC, TGA, TGC, TGT, TTC, TTG; missing from just *Chlore* = CCC, CGT, GCT, TAG, TAT, TCT; missing from *MonNeg*, *Chlore*, and *ChrZof* = AGA, TTT; just *AraTha* = ACC, GAG; just *ChlRei* = ATC; just *MonNeg* = GAT; just *AraTha* and *CocSub* = GGA; and just *ChlRei*, *Chlore*, and *MonNeg* = TCA.

*Number of amino acids: {average, median}:* gene models are taken without question (e.g., even if one does not start with a start codon, end with a stop codon, has coding sequence not a multiple of three nucleotides in length, the coding sequence contains IUPAC ambiguities, the coding sequence is very long, ...) and the result rounded to the nearest integer. *Number of*

*exons containing coding sequence*: {average, median}: gene models are taken without question (e.g., no matter how many exons they have) and the result rounded to the nearest tenth. *Exon length (restricted to coding sequence)*: {average, median}; *Intron length (between exons with coding sequence)*: {average, median}; *Percentage with at least one intron (between exons with coding sequence)*: same comments as for “Number of amino acids: average”.

*% of seq. basepairs RepeatMasker'd with {Repbse Update “eukaryotic”, RepeatModeler, RepeatModeler + Repbase Update “eukaryotic”}*: the RepeatMasker/Repbse/RepeatModeler analysis discussed earlier for *ChrZof* under subsection *Repetitive sequence* was applied to the other five organisms with the same parameters. Masking was variously with just known repeats (Repbse only), just *de novo* repeats from RepeatModeler, and the combination of the two.

*Chloroplasts*. For chloroplast genomes, reference sequences and annotations were as follows. *CocSub*: NCBI accession NC\_015084.1 (with one sequence gap and lacking a large inverted repeat) and annotations. *ChrZof*: chrCp of the ChrZofV5 release of the present work. *AraTha*: NCBI accession AP000423.1 sequence and annotations. *ChlRei*: NCBI accession FJ423446.1 sequence and annotations. *Chlore*: NCBI accession KP271969.1 sequence (lacking a large inverted repeat) and annotations. *MonNeg*: NCBI accession CM002678.1 sequence, but with annotations from Fig. 4 of the original genome paper (54) as the annotations deposited at NCBI are manifestly highly incomplete. *Sequenced genome size*. The number of non-N/n bases in the assembly (other IUPAC ambiguities being tolerated) is reported, rounded to the nearest Kbp. *Number of annotated protein-coding genes, including hypotheticals*; *Number of annotated {rRNAs, tRNAs}*: if the genome contains large repeats (as common in chloroplasts), genes are counted as +1 copy for each copy of the parent repeat. For tRNAs, as with the nuclear genome, if no annotations were provided, an *ab initio* tRNAscan-SE scan was performed (and all types counted). *Percent G+C in sequenced genome*: using only A/C/G/T bases (no IUPAC ambiguities) in an all-uppercase version of the assembly, the fraction (# C+G) / (# A+C+G+T) is reported as a percentage rounded to the nearest integer.

*Mitochondria*. For mitochondrial genomes, reference sequences and annotations were as follows. *CocSub*: NCBI accession NC\_015316.1 sequence and annotations. *ChrZof*: chrMt of the ChrZofV5 release of the present work. *AraTha*: NCBI accession JF729201.1 sequence and annotations. *ChlRei*: NCBI accession NC\_001638.1 sequence and annotations. *Chlore*: NCBI accession NC\_025413.1 sequence and annotations. *MonNeg*: NCBI accession CM002677.1 (with two sequence gaps) and annotations. Rows are the same as for chloroplasts, except for the following note not already mentioned elsewhere: the *MonNeg* mitochondrial sequence has no rRNA annotations (and two sequence gaps); RNAmmer does not find any rDNA, but Rfam finds four zones with LSU/SSU fragments.

### **Calling of protein-coding gene families across the six organisms of Table S1**

To call gene families (Datasets S9–S18) simultaneously across *AraTha*, *ChlRei*, *ChrZof*, *CocSub*, *Chlore*, and *MonNeg* (the six organisms of Table S1), the amino acid sequences of the genes corresponding to row “Number of called protein-coding gene loci (collapsing transcript forms)” of Table S1 were collected. Alignment seeds were formed by running NCBI BLASTP+ 2.4.0 with E-value threshold  $10^{-5}$  and soft masking (segmasker window 12, locut 2.2, hicut 2.5) on



both queries and subjects (and otherwise defaults, including BLOSUM62 scoring). For every distinct ordered pair (*query*, *subject*) with at least one BLASTP+ result, global Needleman–Wunsch alignment was performed with the C++ library Parasail (BLOSUM62 scoring with gap open and extend penalties 10 and 1, respectively). Compared to the local alignments of BLASTP, the global alignment score captures not only sequence similarity, but also aspects of the fraction of the entirety of query and subject aligned and the ordering of homologous fragments (e.g., component protein domains).

In the first phase, “self-prefamilies” were formed within each organism. For Parasail-aligned pairs of genes (*query*, *subject=query*) with global alignment score  $s \geq 16$ , keep as “tentative arcs” those Parasail pairs (*query*, *subject in same organism except query itself*) with global alignment score  $\geq 85\%$  of  $s$ . Remove tentative arcs (*query*, *subject*) for which (*subject*, *query*) is not a tentative arc, so as to obtain unordered pairs {*gene*, *different gene in same organism*} that constitute edges in an undirected graph. Partition vertices of this graph (the pieces of this partition being the self-prefamilies) by subdividing the vertices of each connected component as follows: (1) find all maximal cliques in the connected component; (2) keep only cliques of maximum size; (3) expand each clique to also contain those vertices in the connected component that are adjacent to at least half the vertices in the clique; (4) keep only expanded cliques of maximum size by number of vertices in them; (5) group vertices in the union of the surviving expanded cliques by their combination of membership status in the surviving expanded cliques, these groups becoming pieces of the final partition; and (6) recurse [going back to (1)] on any vertices remaining. Finally, each gene in the organism not represented is added as a singleton self-prefamily (of size 1). Self-prefamilies involve 1 to 31 genes (but only 1 to 4 genes each when restricting to sizes occurring  $\geq 10$  times in any single organism, and only 1 or 2 genes each when restricting to sizes seen  $\geq 100$  times in any single organism). The percent of genes in self-prefamilies of size  $\geq 2$  is  $\sim 8.4\%$  and  $\sim 4.6\%$  in the large genomes *AraTha* and *ChlRei*, respectively;  $\sim 2.9\%$  and  $\sim 2.2\%$  in the algal moderate G+C content genomes *CocSub* and *ChrZof* of low repetitive sequence fraction, respectively; and  $\sim 1.1\%$  and  $\sim 0.9\%$  in the algal high G+C genomes *Chlore* and *MonNeg* of moderate repetitive sequence fraction, respectively.

Self-prefamilies exhibit evidence of tandem duplication events in all six genomes. For example, consider self-prefamilies of size exactly 2. (Across organisms, this is  $\sim 73\%$  to  $\sim 96\%$  of self-prefamilies of size  $\geq 2$ .) Given such a self-prefamily, classify it as type “Far” if the two genes are on different sequences in the reference genome or the midpoint of the bounds of their coding sequences are  $\geq 20$  Kbp apart; otherwise, classify it as type “Near<sup>+</sup>” if the two genes are on the same strand or “Near<sup>-</sup>” if they are on opposite strands. There is enrichment for Near<sup>-</sup> and larger enrichment for Near<sup>+</sup> in every organism:

| Organism:     | # observed: |                   |                   | random expectation: |                   |                   | observed / expected: |                   |                   |
|---------------|-------------|-------------------|-------------------|---------------------|-------------------|-------------------|----------------------|-------------------|-------------------|
|               | Far         | Near <sup>+</sup> | Near <sup>-</sup> | Far                 | Near <sup>+</sup> | Near <sup>-</sup> | Far                  | Near <sup>+</sup> | Near <sup>-</sup> |
| <i>AraTha</i> | 714         | 214               | 30                | $\sim 958$          | $\sim 0.181$      | $\sim 0.170$      | $\sim 0.75$          | $\sim 1,184$      | $\sim 176$        |
| <i>ChlRei</i> | 146         | 58                | 30                | 234                 | 0.040             | 0.041             | 0.62                 | 1,454             | 725               |
| <i>Chlore</i> | 20          | 16                | 6                 | 42                  | 0.017             | 0.018             | 0.48                 | 943               | 328               |
| <i>ChrZof</i> | 104         | 12                | 8                 | 124                 | 0.040             | 0.040             | 0.84                 | 298               | 199               |
| <i>CocSub</i> | 41          | 13                | 1                 | 55                  | 0.020             | 0.023             | 0.75                 | 649               | 44                |
| <i>MonNeg</i> | 59          | 9                 | 1                 | 69                  | 0.006             | 0.006             | 0.86                 | 1,512             | 174               |

In the second phase, “prefamilies” are formed — these target orthologs (“primaries”) and generally involve more than one organism. For Parasail-aligned pairs (*query, subject in different organism*) sharing the same query, drop all these pairs if the best global alignment score  $s$  is  $< 16$  and otherwise keep only pairs with global alignment score  $\geq 97\%$  of  $s$ . Replace kept ordered pairs of genes (*query, subject*) with ordered pairs (*self-prefamily of query, self-prefamily of subject*) and thin ordered pairs seen more than once down to a single copy. Taking these as the new “tentative arcs”, follow the same procedure as used to form self-prefamilies, except the resulting partition pieces now constitute the prefamilies. Each of these involves 1 to 15 self-prefamilies;  $\sim 67\%$  and  $\sim 90\%$  of genes in multi-organism prefamilies belong to prefamilies with at most 1 and at most 2, respectively, self-prefamilies per organism.

In the third phase, final families are formed — with paralogs now also targeted as “additional” genes in each family — by merging into each multi-organism prefamily zero or more single-organism prefamilies. Each single-organism prefamily  $S$  is considered independently one at a time: for each gene  $a$  in  $S$ , gather Parasail alignments ( $a$ , *gene  $b$  in a multi-organism prefamily*) and (*gene  $b$  in a multi-organism prefamily*,  $a$ ), keep only alignments with maximum global alignment score, and note the multi-organism prefamilies that surviving  $b$  belong to; if exactly one multi-organism prefamily  $M$  is noted after all  $a$  are considered and at least one kept alignment was seen with strictly positive global alignment score, then  $S$  is merged into  $M$  as additional genes (and otherwise  $S$  is left alone). 5,258 multi-organism prefamilies receive merges, each 1 to 196 times, with  $\sim 88\%$  of these  $\leq 6$  times. There are 41,328 final families (these partitioning all  $27,206 + 17,741 + 15,344 + 9,629 + 9,791 + 16,734 = 96,445$  genes from *AraTha*, *ChlRei*, *ChrZof*, *CocSub*, *Chlore*, and *MonNeg*, with each gene belonging to exactly one final family), with 30,838 and 10,490 involving single vs. multiple organisms, respectively. Of the 10,490, 5,012 have  $\leq 1$  gene (primary + additional) per organism and 7,904 have  $\leq 2$  genes. The largest families are of various histone proteins.

| Reference genome: | % of reference genes that belong to multi-organism families: | Same, except multi-orgo. family restricted to having $\leq 2$ genes (primary+add'l) per organism: | Same, except multi-organism family has $\leq 1$ gene per organism: |
|-------------------|--------------------------------------------------------------|---------------------------------------------------------------------------------------------------|--------------------------------------------------------------------|
| <i>AraTha</i>     | $\sim 60\%$                                                  | $\sim 18\%$                                                                                       | $\sim 7\%$                                                         |
| <i>ChlRei</i>     | 64%                                                          | 37%                                                                                               | 21%                                                                |
| <i>Chlore</i>     | 83%                                                          | 52%                                                                                               | 29%                                                                |
| <i>ChrZof</i>     | 73%                                                          | 47%                                                                                               | 27%                                                                |
| <i>CocSub</i>     | 77%                                                          | 50%                                                                                               | 26%                                                                |
| <i>MonNeg</i>     | 63%                                                          | 39%                                                                                               | 20%                                                                |

### Details of main text Fig. 3B/C

*Phylogram.* The 813 protein-coding gene families (called across the six organisms of Table S1) that have no additional genes and exactly one primary gene in each of the six organisms were identified. Because of the highly fragmentary nature of the *MonNeg* assembly (and the possibility of artificially truncated gene coding sequences), an additional condition that the shortest protein across the six organisms is  $\geq 85\%$  of the length of the longest protein was also imposed, resulting in 75 families with an average of  $\approx 27K$  amino acids per organism. Multiple alignments and phylogram estimation were by the ETE Toolkit `sptree_fasttree_all /`

standard\_fasttree pipelines (56, 57). Alternatively, if *MonNeg* is ignored, there are 1,253 families before the similar length requirement, and if this requirement is loosened from 85% to 50%, 978 families with an average of  $\approx 497$ K amino acids per organism proceed to the same ETE pipelines, and the resulting phylogram is very similar to that shown with just a slightly higher average rate of amino acid changes but similar proportions; this phylogram was stable when the 978 families were randomly partitioned into six groups of 163 families each. An analysis based on 16S/18S rRNA nucleotide sequences extracted from NCBI also produces a similar phylogram (but with a much lower average rate of nucleotide change). The topology of all these trees is in agreement with Leliaert, *et al.* (58).

*Scatter plot showing scrambled syntenic blocks.* This (and Figs. S2–S10) are similar to Fig. 2 for *CocSub* vs. *Chlore* in Blanc, *et al.* (51), but with a finer scheme for generating statistical enrichment shading as well as permutation of genome assembly sequences to emphasize enrichments. To identify statistically enriched regions, each assembly sequence is partitioned into as equal-sized pieces as possible with each piece being  $\approx 1$  Mbp (small sequences are taken whole); this induces a 2-D partitioning of the plotted area, and the number of observed gene pairs (red plus green dots) in each 2-D bin is noted. Randomized versions of the plot are then generated: for each version, the identities of all genes are shuffled in each genome and new numbers of points in each 2-D bin tallied; the *p*-value for a 2-D bin is taken as the fraction of times the random tally is larger than the observed tally over 100,000 randomizations. These *p*-values are used to shade the background of 2-D bins from white (*p*-values above 0.01) to increasingly orange on a logarithmic scale to deepest orange for *p*-values near 0.00001.

The plotted order of genome assembly sequences along each axis is determined as follows. Reordering is only performed among those sequences (“large”) in an assembly  $\geq 0.5$  Mbp long. First, consider 2-D bins with *p*-values at or below 0.01, and form a directed graph with arcs from *x*-axis large sequences to *y*-axis large sequences with arc weights given by the total number of red plus green dots in considered 2-D bins that land in the pair of sequences, deleting arcs of weight zero. Using the `Centrality` method of `FindGraphCommunities[]` in Mathematica, partition the sequences into an ordered list of clusters. Start by considering in turn those clusters that involve both genomes: find a maximal-weight matching for the subgraph of the current cluster, place ordered pairs (*x*-axis assembly original sequence number, *y*-axis assembly original sequence number) for the matching in ascending lexicographic order, and take these as the next sequences in the reordering for both genomes; if the matching does not involve all sequences in the cluster, add the leftover sequences by ascending original assembly order. Finally, after all clusters involving both genomes are processed, in each genome add in all sequences not yet included in ascending original assembly order.

## Gene prediction and functional annotation

*Ab initio* gene models (Dataset S19) were constructed with AUGUSTUS 3.0.3 using default parameters except where noted as follows. PASA 2.0.2 (50) was used to extract a training set of 6,576 genes from the assembled transcriptome. Prediction hints for AUGUSTUS were created by aligning the transcriptome to the genome with BLAT 35. Functional annotations were generated from protein translations of predicted gene models. For example, BLAST2GO 6.0 (59) was used to associate Gene Ontology (GO, 60) terms as well as brief textual descriptions to

genes. To generate protein domain/family annotations, protein translations were scanned against PfamA release 29 with HMMER 3.1b2 (61). Additional GO associations were derived using the Pfam2GO translation table from EMBL-EBI (62). All functional enrichment analyses were based on hypergeometric statistical tests using the annotations of the entire genome as background.

### **Astaxanthin-deficient mutants**

A non-targeted forward genetics screen generated astaxanthin-deficient mutants. Cells were grown to log phase ( $2\text{--}5 \times 10^6$  cells/mL), subjected to ultraviolet radiation (80,000  $\mu\text{joules}$ ), and plated onto selection media (proteose media with 28 mM glucose). The selection media enhances the production of astaxanthin, which causes the cells to become pink; therefore green colonies were selected as astaxanthin candidate mutants. The lack of astaxanthin production was confirmed by HPLC pigment analysis. To analyze pigments, cells were scraped from plates and homogenized with acetone and lysing matrix D for  $2 \times 60$  s with the FastPrep-24 ( $6.5 \text{ m s}^{-1}$ , MP Biomedical). The cell debris was pelleted by centrifugation (20,000  $g$  for 3 min) and the supernatant was removed. To ensure complete extraction, another aliquot of acetone was added to the cell debris pellet and the extraction process was repeated; pigments were determined by HPLC as previously described (63). To sequence the  $\beta$ -carotene ketolase gene from *C. zoﬁngiensis* wild type and astaxanthin mutants, a series of synthetic primers (Table S5) were used to amplify overlapping fragments of genomic DNA. Sequences were assembled using Lasergene MegAlign (DNASTAR) and putative point mutations were identified.

Liquid cultures of wild type and astaxanthin mutants were grown until log phase under medium light ( $100 \mu\text{mol photons m}^{-2} \text{ s}^{-1}$ ) and then high light treatment cultures were moved to  $400\text{--}450 \mu\text{mol photons m}^{-2} \text{ s}^{-1}$  for 10 days. Replicates ( $N = 3$  or  $4$ ) were harvested by centrifugation and the cell pellet was frozen in liquid nitrogen. Pigment determination was conducted as described above. Pigment concentrations were tested for assumptions of normality and homoscedasticity, and data were log-transformed accordingly prior to analyses. ANOVA was used to test the effects of high light. For all significant factors in the ANOVA tests, post-hoc Tukey-Kramer HSD pairwise comparisons were used to test which groups were significantly different.  $\alpha$ -carotene concentrations were not normally distributed and the Kruskal-Wallis non-parametric test was used instead to evaluate statistical differences. Statistical differences were reported significant at the  $\alpha = 0.05$  level.

## SI Figures

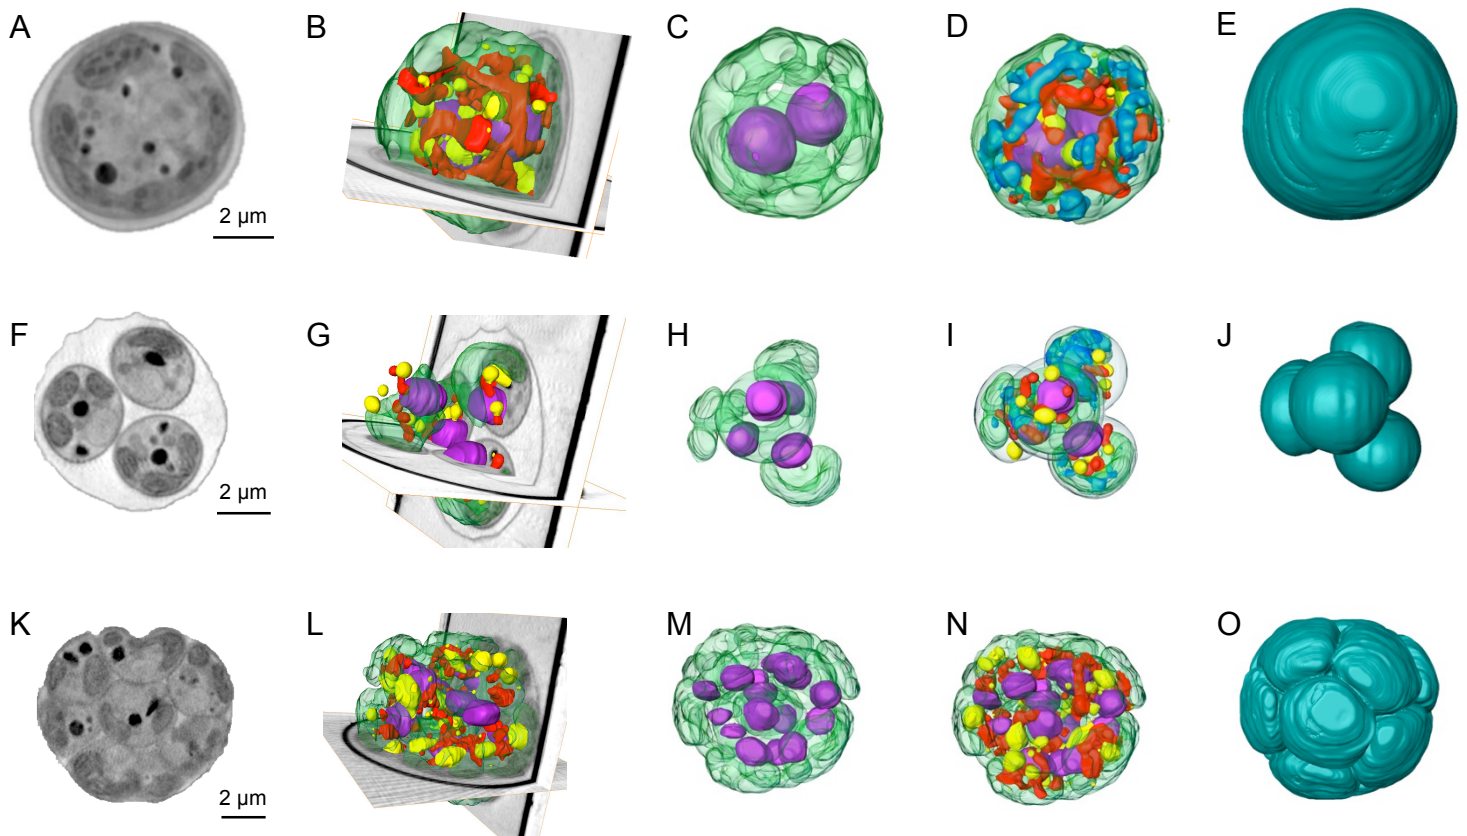

**Fig. S1. *Chromochloris zofingiensis* cell morphology.** Soft X-ray tomography of reconstructed cell with segmented nucleus (purple), chloroplast (green), mitochondria (red), lipids (yellow), and starch granules (blue). Cellular structures of a dividing cell with two nuclei (A–E), cell dividing into 4 cells (F–J), and dividing into 16 cells (K–O). For each cell, a representative orthoslice of the reconstructed cell (A, F, K), 3-D segmentation over two orthogonal orthoslices (B, G, L), segmented chloroplast and nucleus (C, H, M), fully segmented cell (D, I, N), and cell walls (E, J, O) are shown. Movies S1–S5 show transmission of a single cell and 3-D reconstruction of cells.

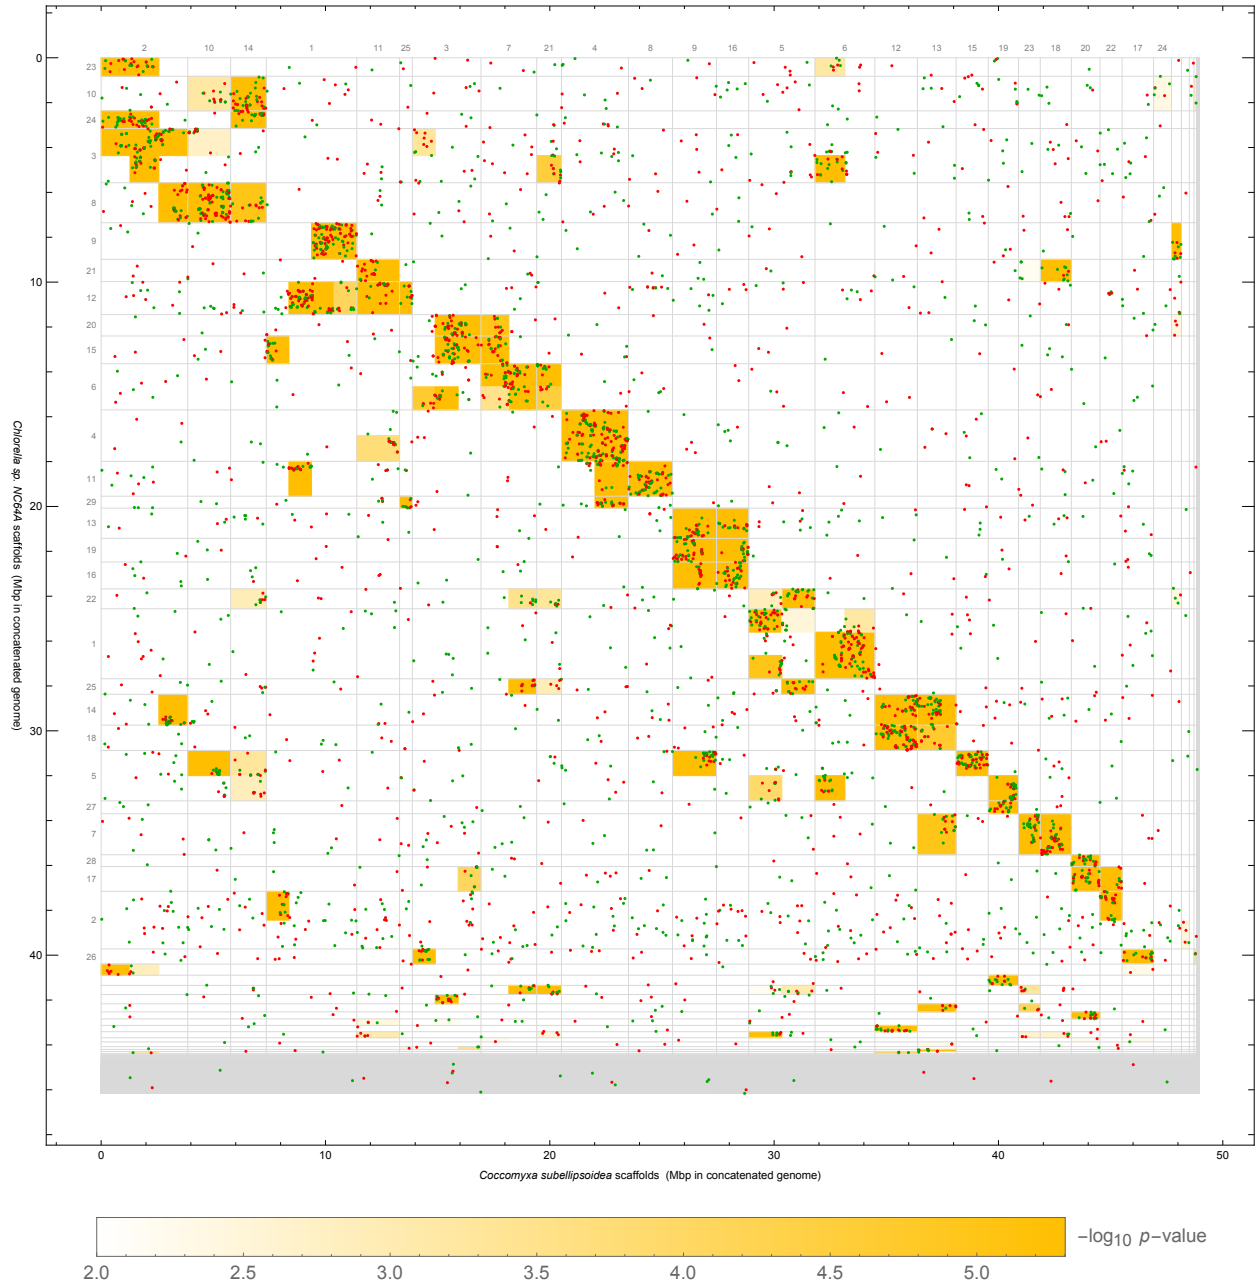

**Fig. S2. Gene-level synteny for *Coccomyxa subellipsoidea* C-169 vs. *Chlorella* sp. NC64A in the style of main text Fig. 3C.**

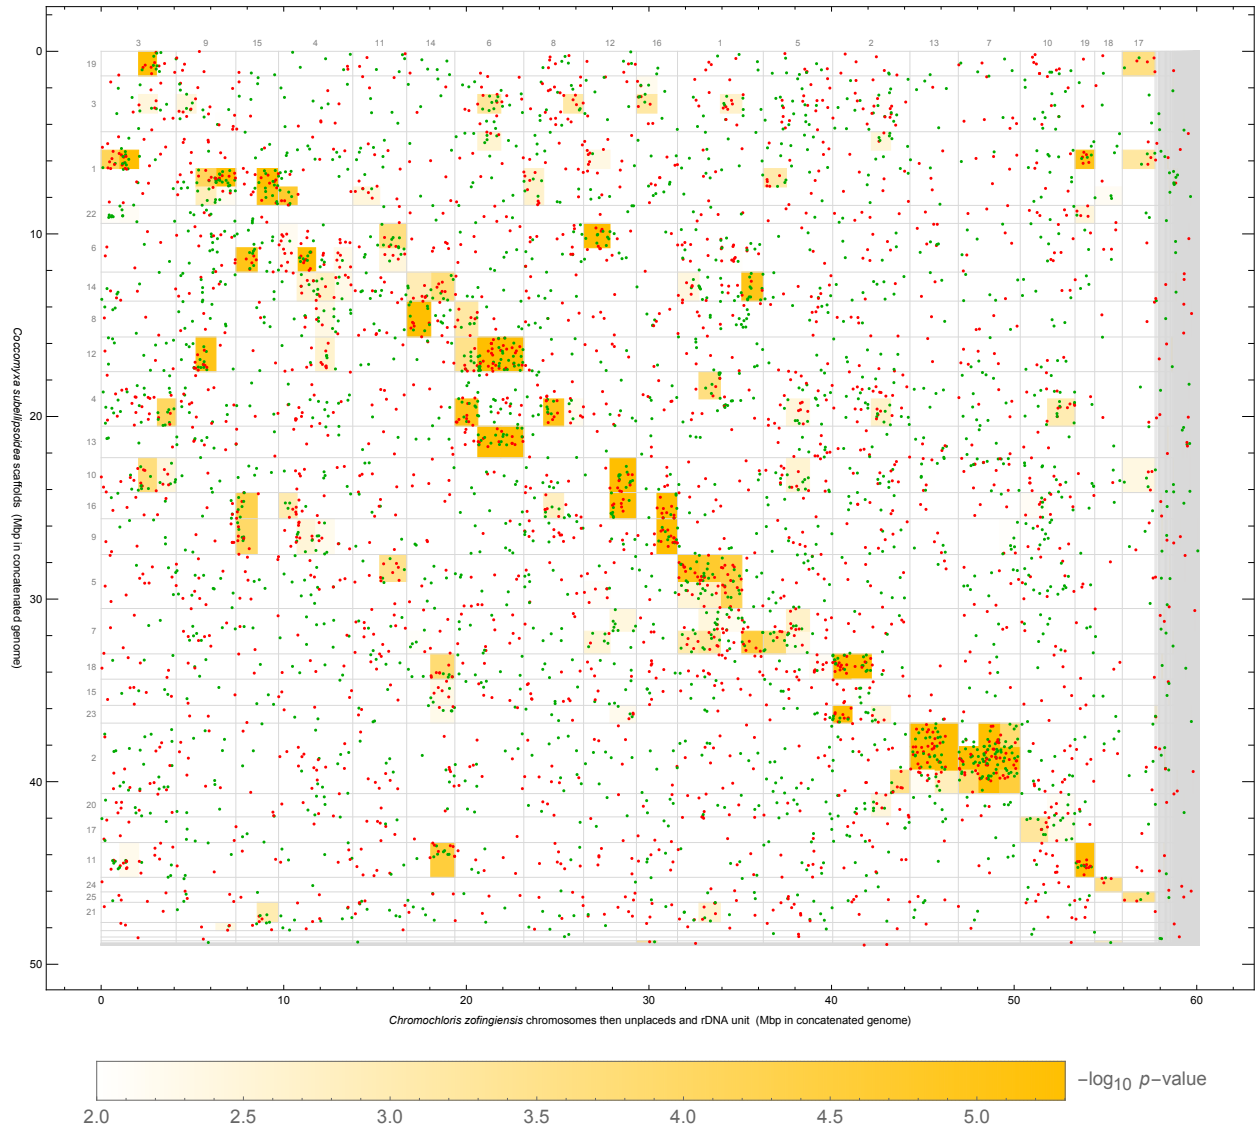

**Fig. S3. Gene-level synteny for *Chromochloris zofingiensis* vs. *Coccomyxa subellipsoidea* C-169 in the style of main text Fig. 3C.**

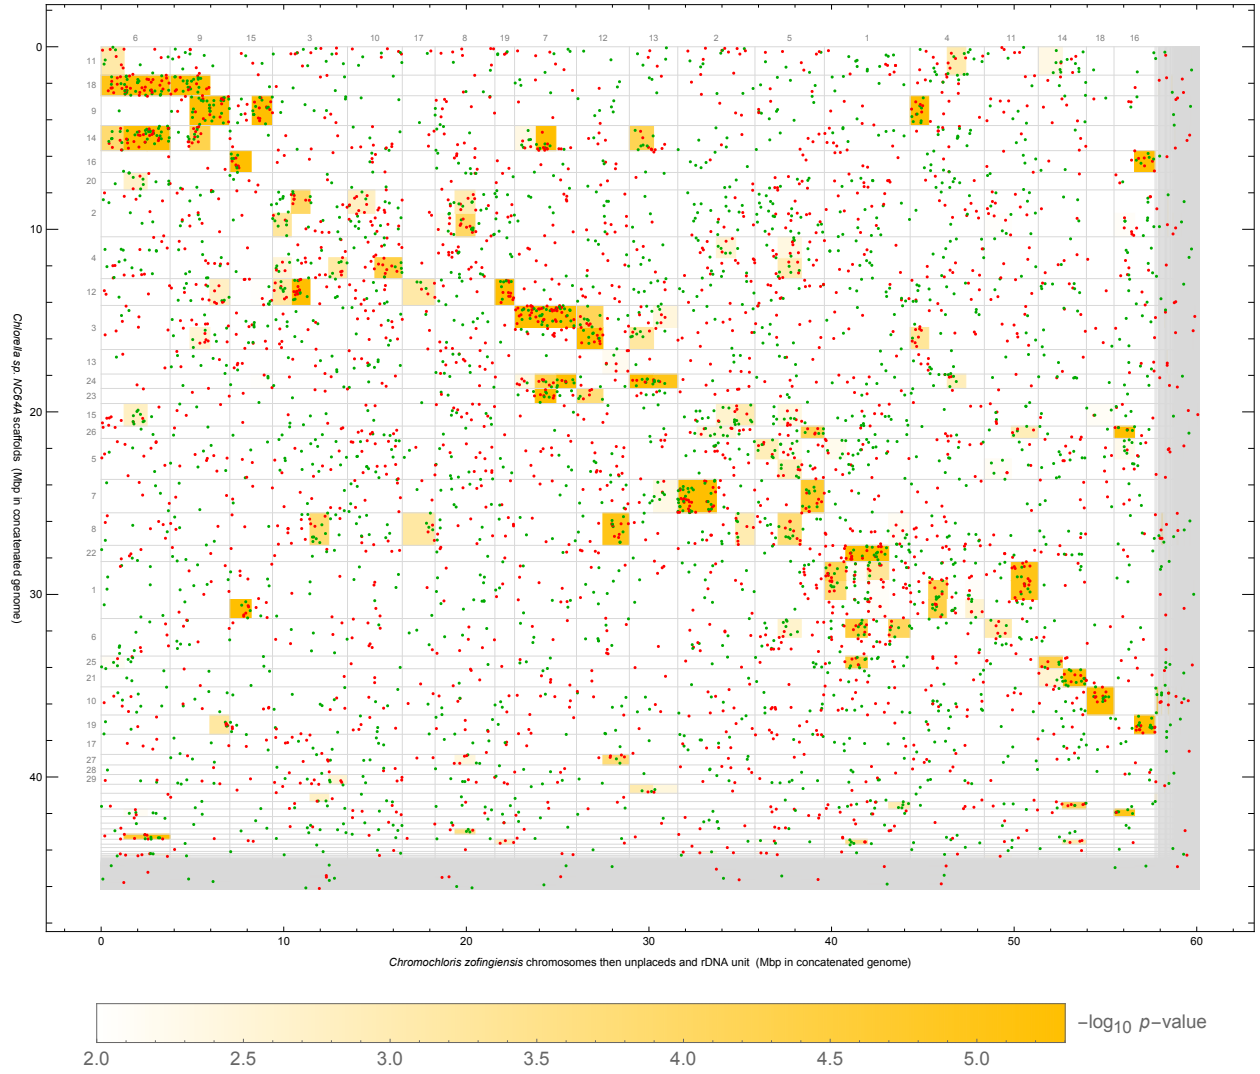

**Fig. S4. Gene-level synteny for *Chromochloris zofingiensis* vs. *Chlorella* sp. NC64A** in the style of main text Fig. 3C.



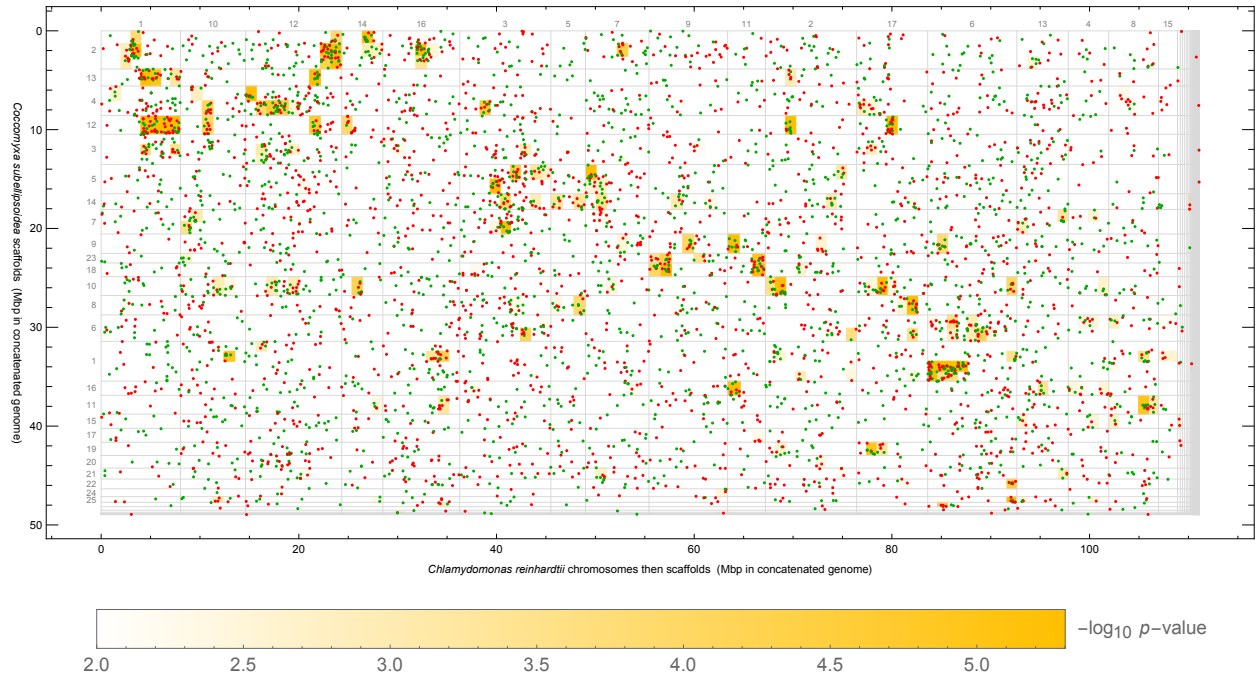

**Fig. S5. Gene-level synteny for *Chlamydomonas reinhardtii* vs. *Coccoomyxa subellipsoidea* C-169 in the style of main text Fig. 3C.**

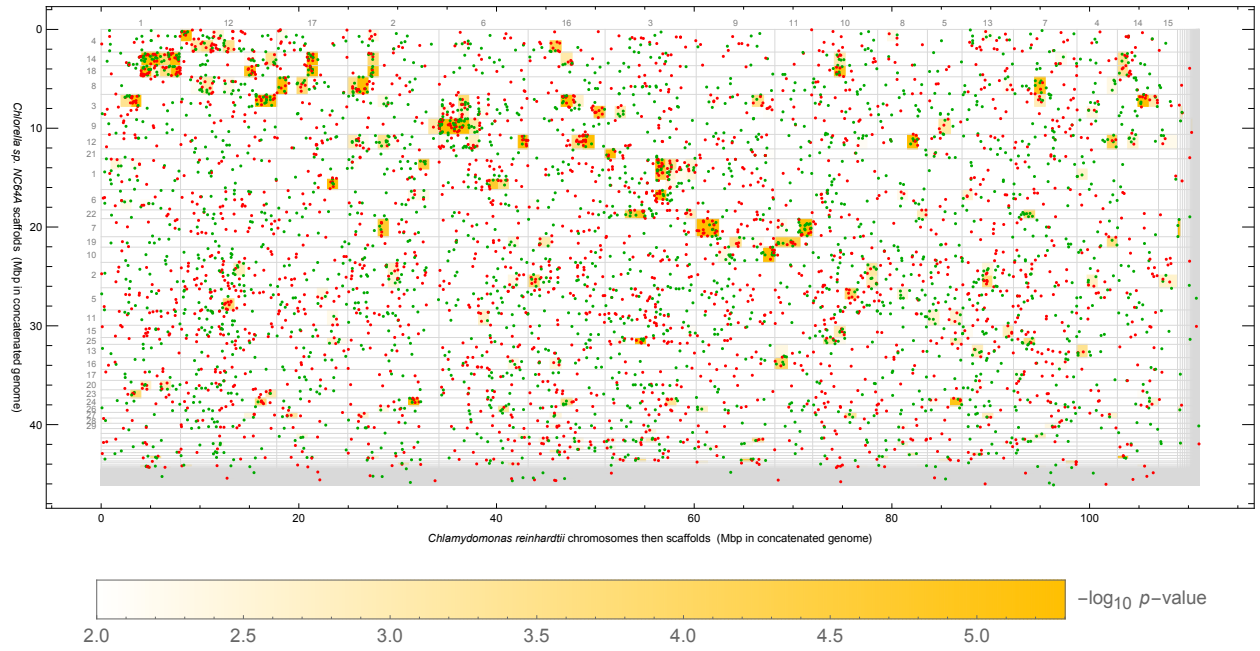

**Fig. S6. Gene-level synteny for *Chlamydomonas reinhardtii* vs. *Chlorella sp. NC64A* in the style of main text Fig. 3C.**

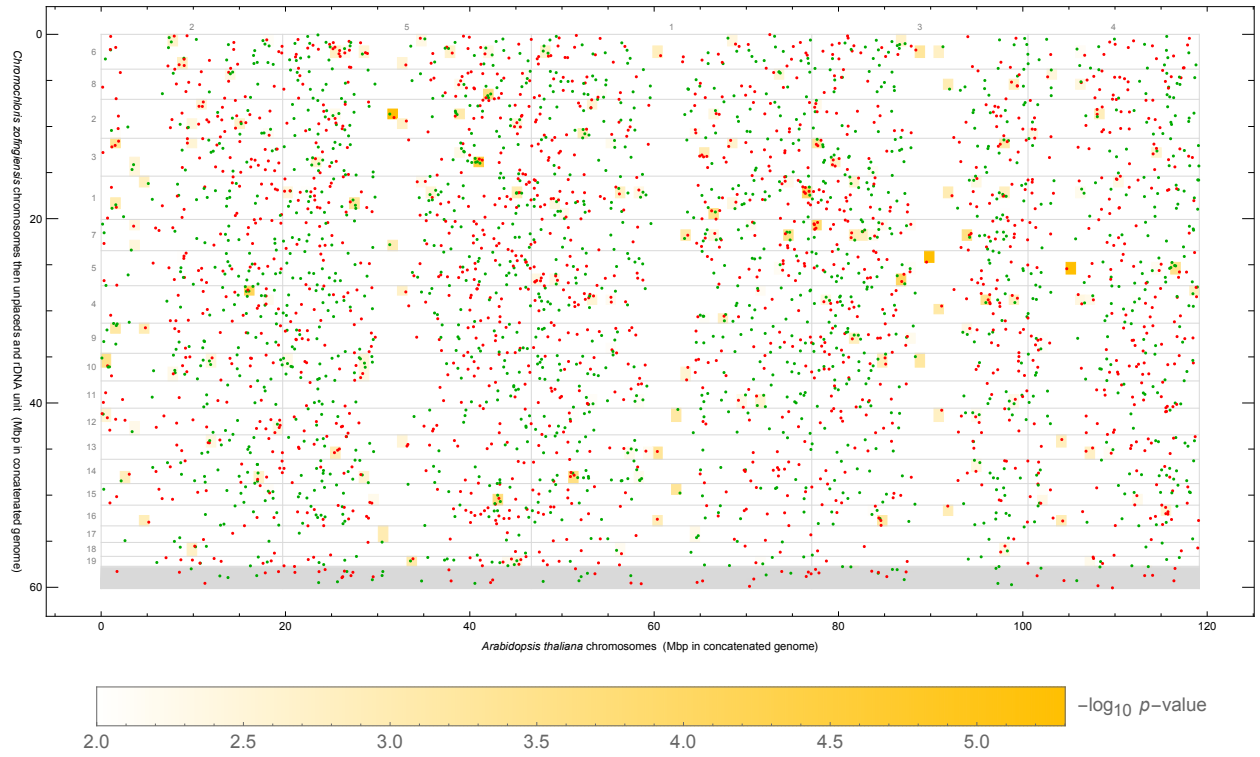

**Fig. S7. Gene-level synteny for *Arabidopsis thaliana* vs. *Chromochloris zofingiensis* in the style of main text Fig. 3C.**

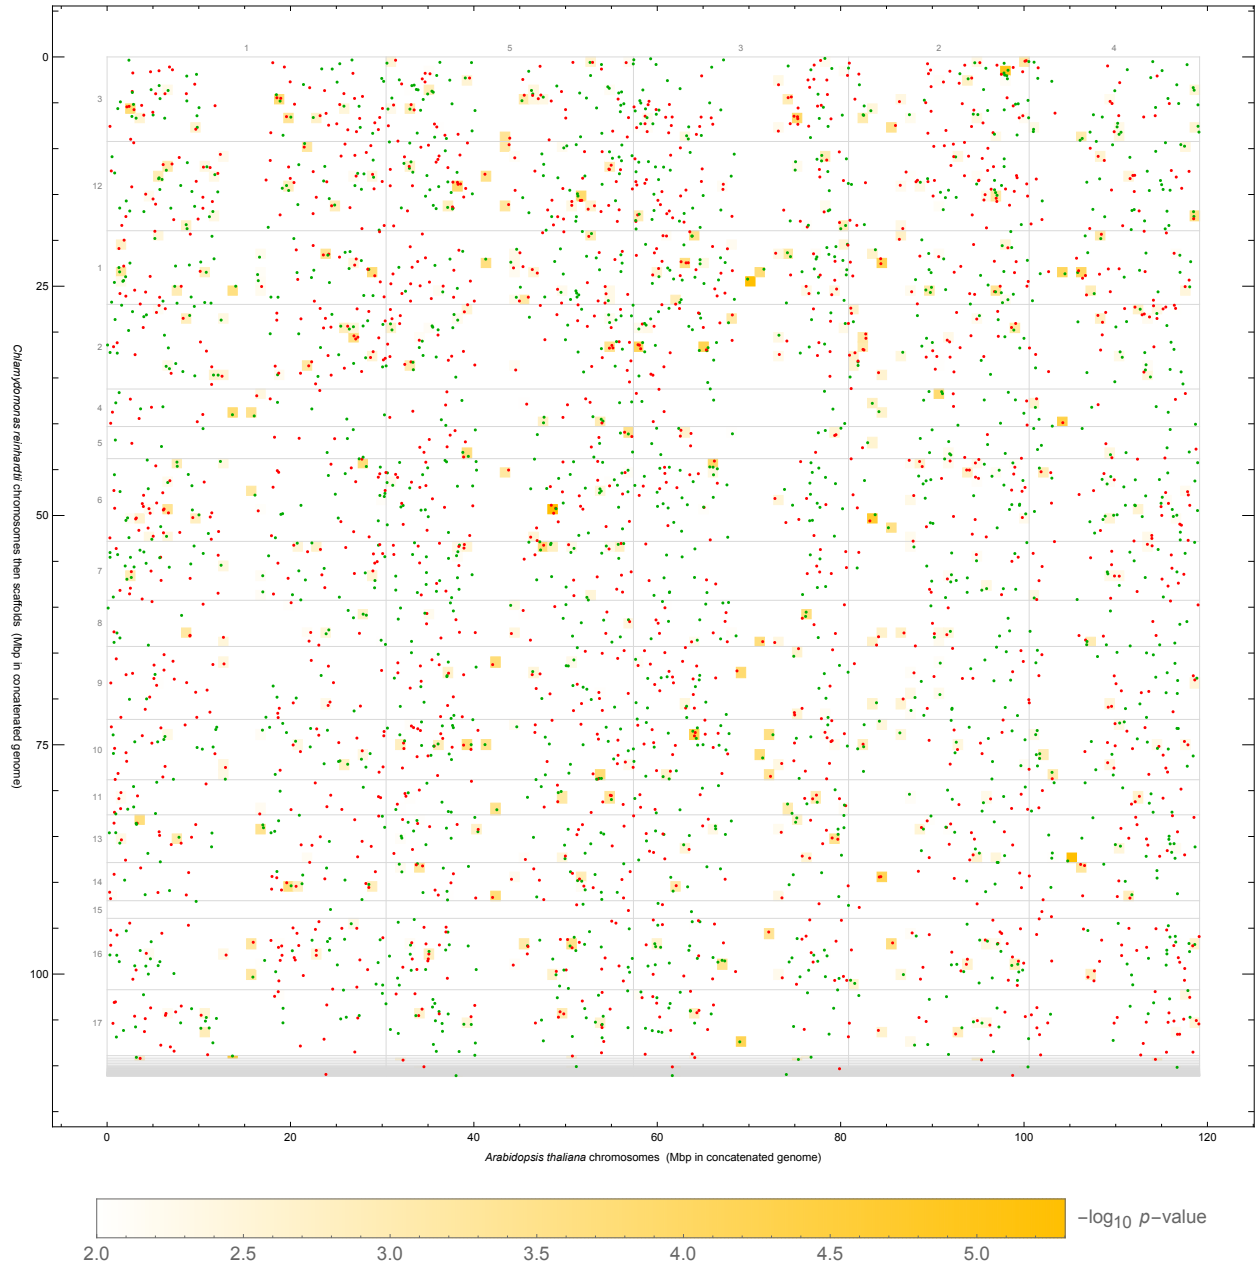

**Fig. S8. Gene-level synteny for *Arabidopsis thaliana* vs. *Chlamydomonas reinhardtii*** in the style of main text Fig. 3C.

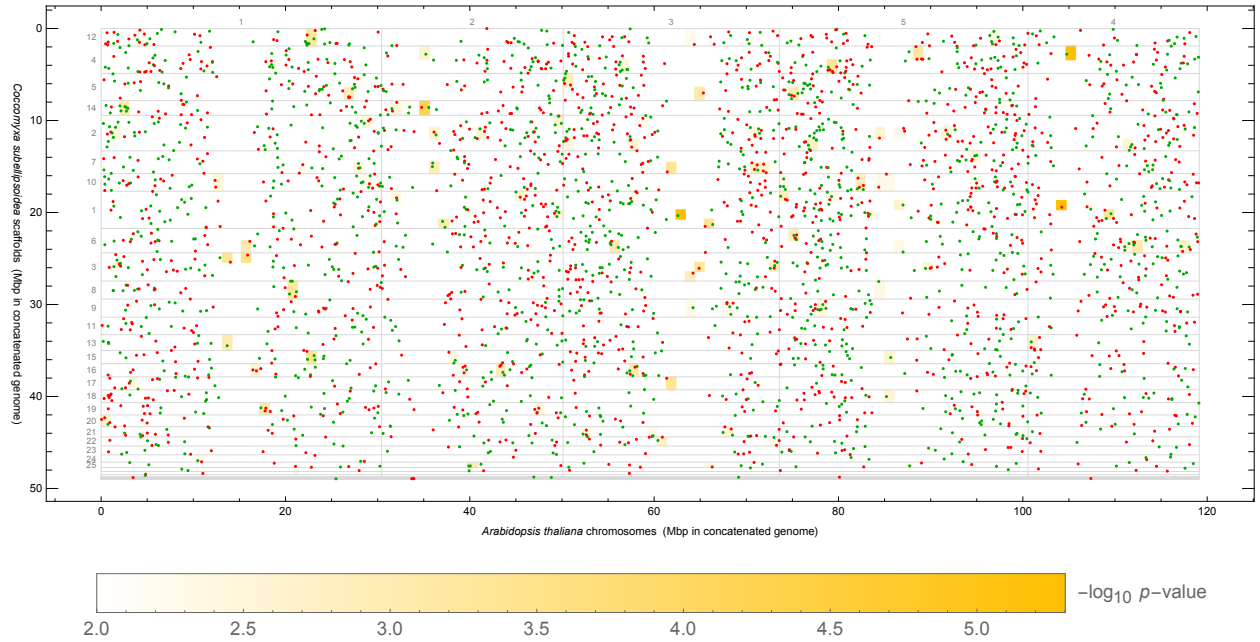

**Fig. S9. Gene-level synteny for *Arabidopsis thaliana* vs. *Coccomyxa subellipsoidea* C-169** in the style of main text Fig. 3C.

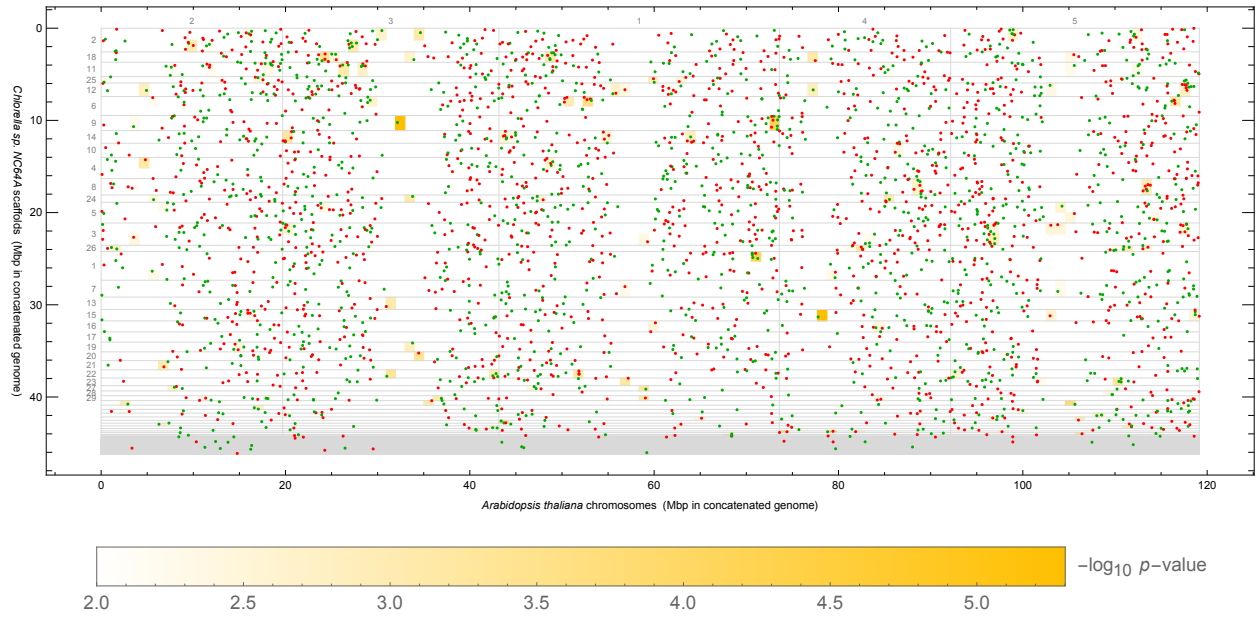

**Fig. S10. Gene-level synteny for *Arabidopsis thaliana* vs. *Chlorella sp. NC64A* in the style of main text Fig. 3C.**

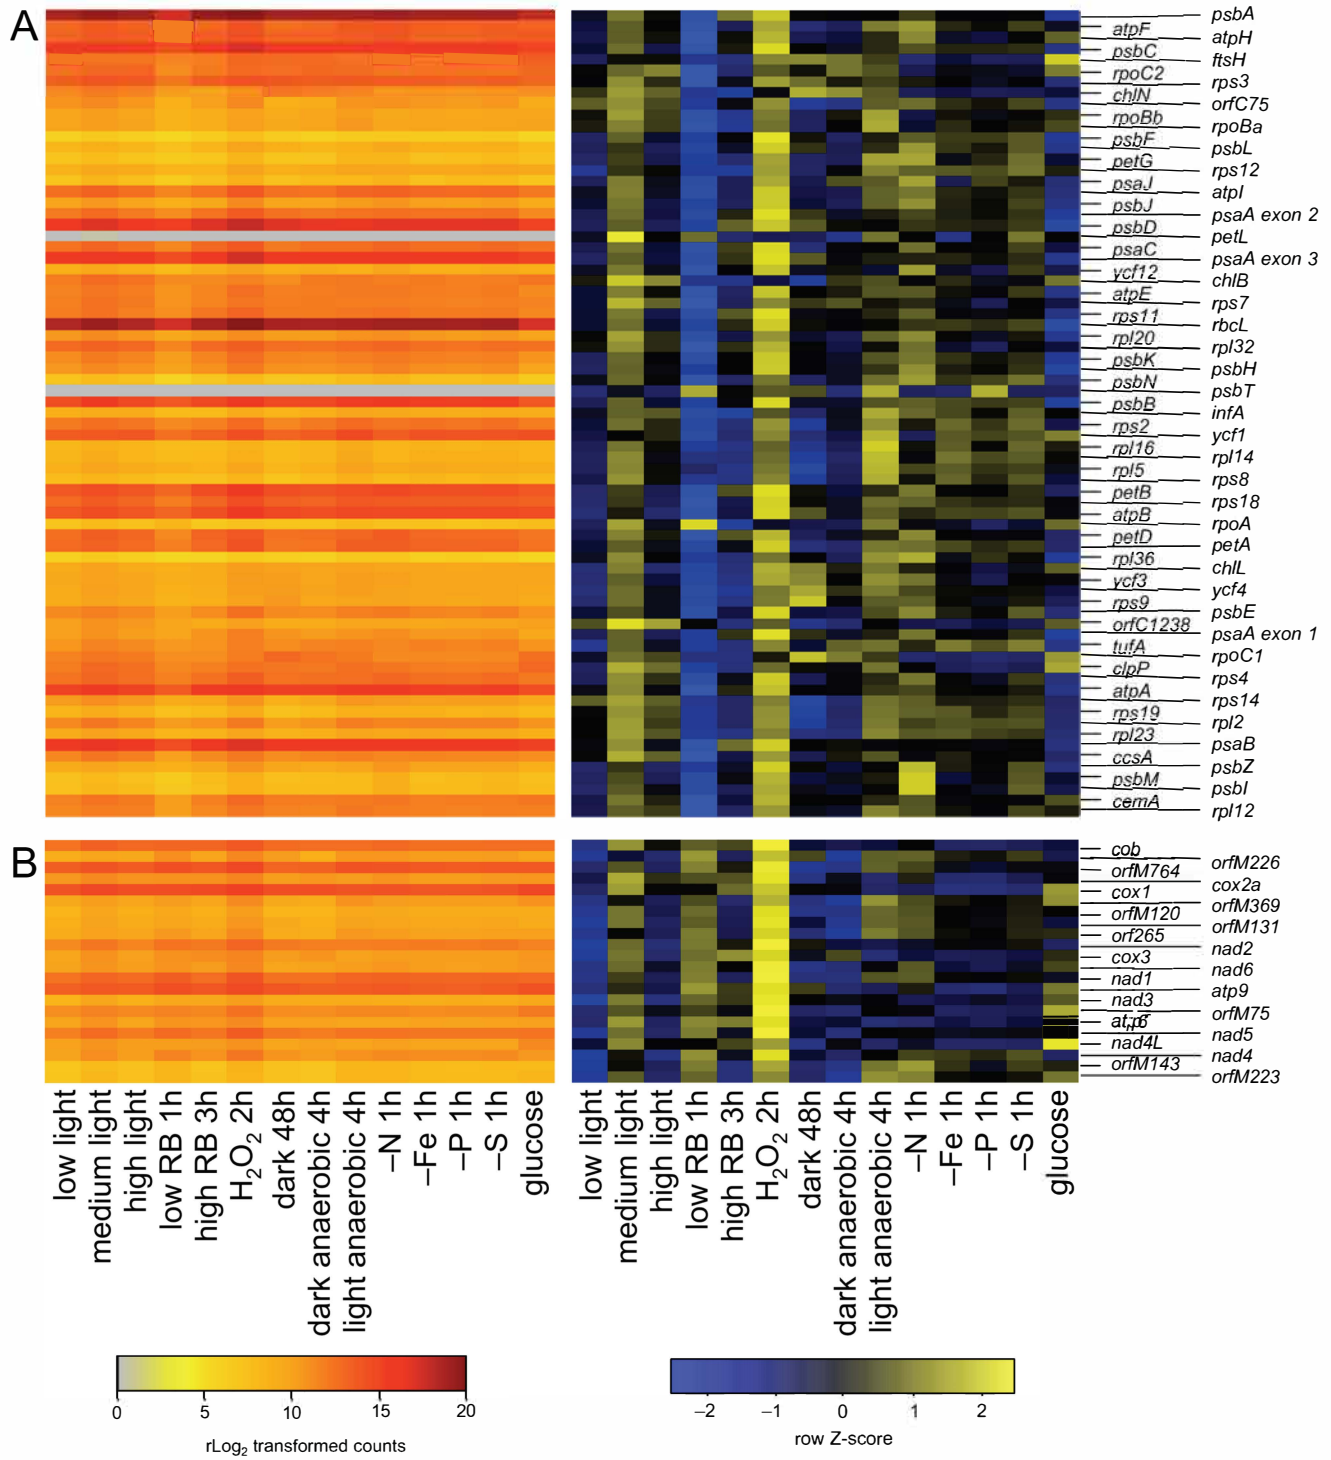

**Fig. S11. Chloroplast and Mitochondrial RNA-Seq expression profiles across a range of growth conditions.** RNA-Seq was performed on total RNA collected from *C. zofingiensis* grown under 14 different conditions including nutrient deprivation, oxidative stress, heterotrophic growth, and a range of light intensities. Total RNA depleted of rRNA was used so as to capture the non-polyadenylated transcripts expressed in the chloroplast and mitochondria. (A) Chloroplast gene expression. On the left, transcript abundances of the 73 chloroplast genes were quantified in terms of regularized  $\log_2$ -transformed counts and plotted as a heatmap for each of the 14 conditions. On the right, each gene was normalized across the 14 conditions and the resulting z-scores were plotted. (B) Mitochondrial gene expression. The 22 chloroplast genes were analyzed as in panel A.



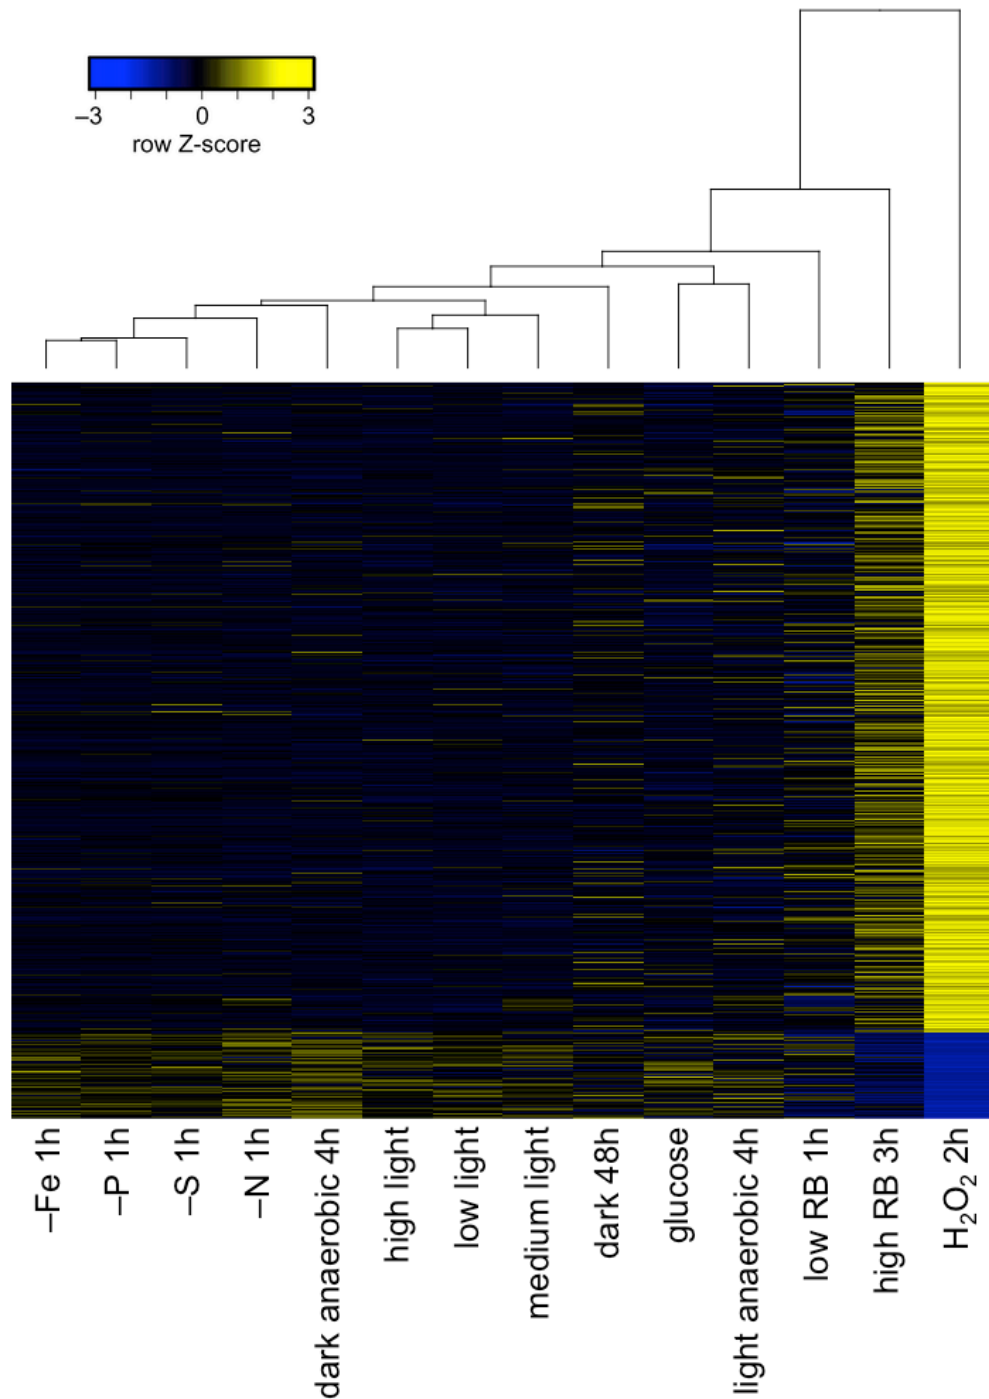

**Fig. S12.** Genes affected by H<sub>2</sub>O<sub>2</sub> stress. Transcript abundance estimates for all genes were normalized across 14 different conditions. Those with a z-score > 2 or < -2 in the H<sub>2</sub>O<sub>2</sub>-treated sample were selected and plotted as a clustered heatmap (*N* = 3934). The dendrogram above indicates the relationship between the 14 conditions.

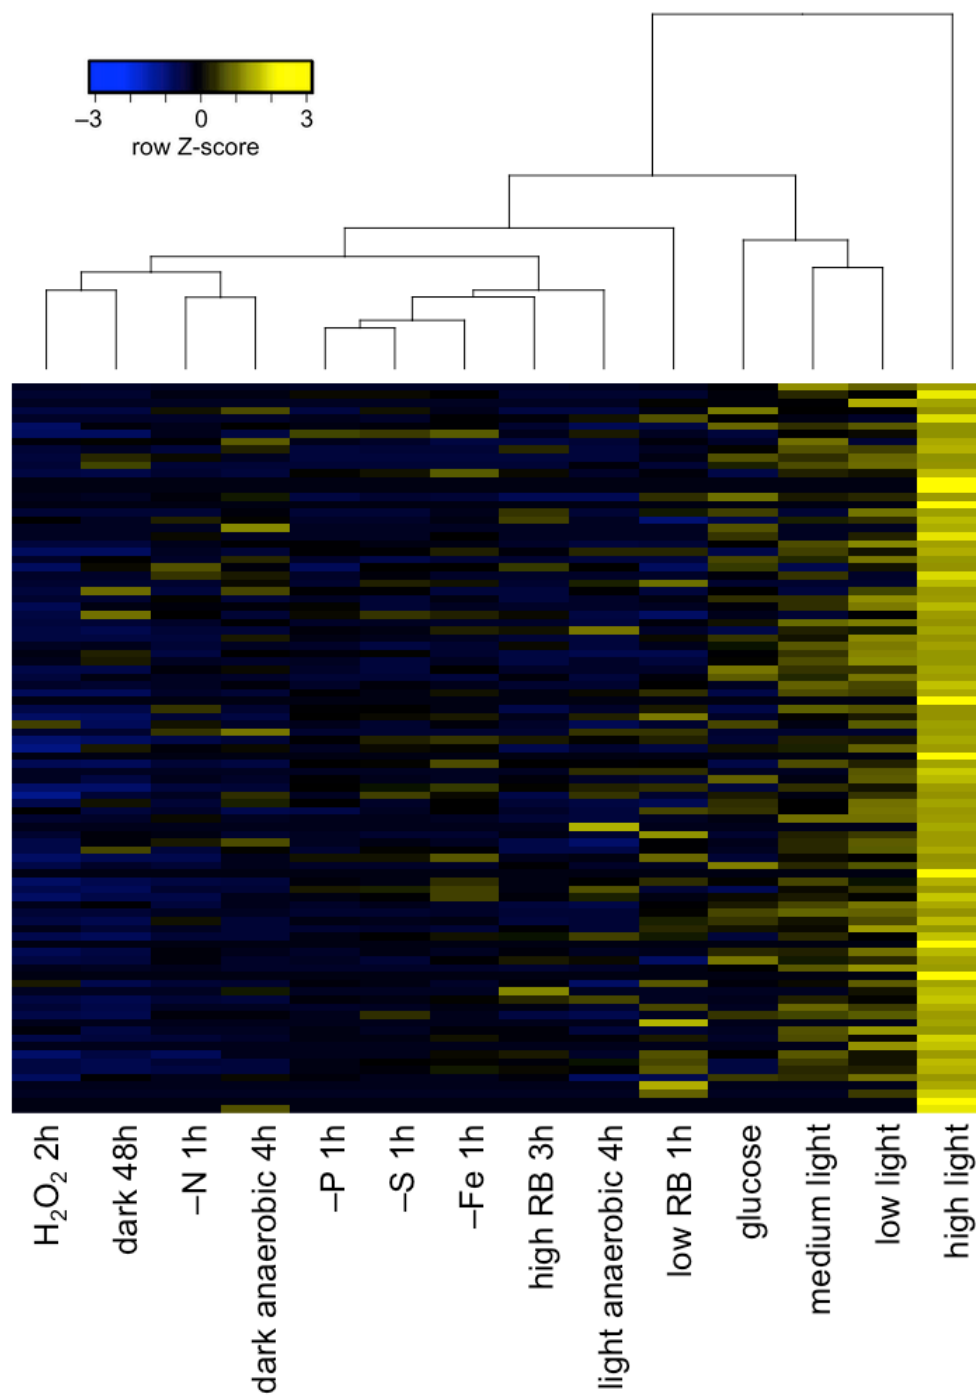

**Fig. S13.** Genes affected by high light. Transcript abundance estimates for all genes were normalized across 14 different conditions. Those with a z-score  $> 2$  or  $< -2$  in the high light sample were selected and plotted as a clustered heatmap ( $N = 93$ ). The dendrogram above indicates the relationship between the 14 conditions.

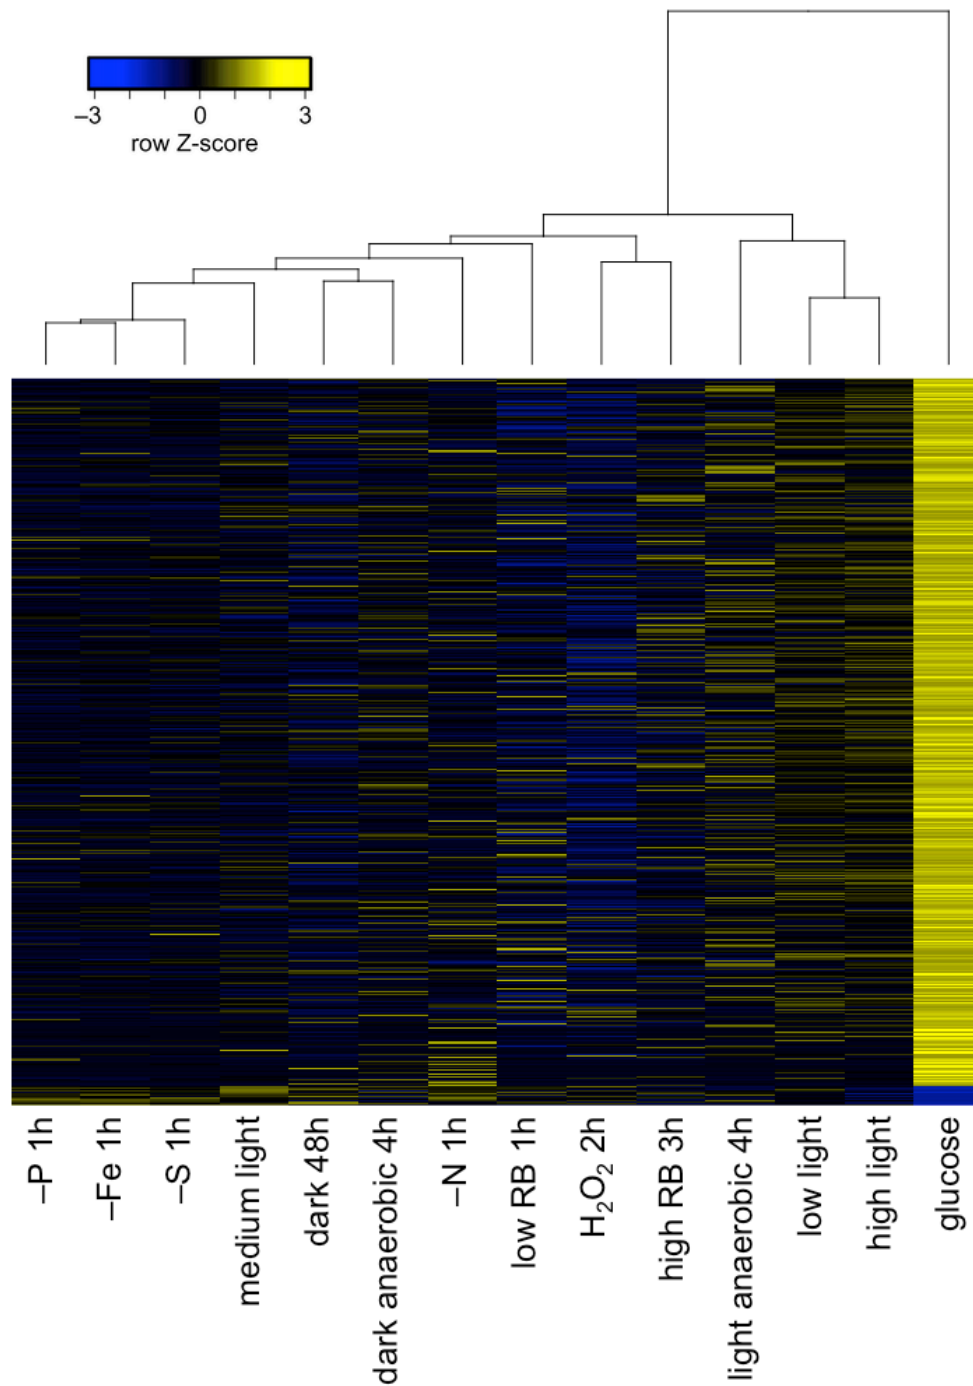

**Fig. S14.** Genes affected by glucose. Transcript abundance estimates for all genes were normalized across 14 different conditions. Those with a z-score  $> 2$  or  $< -2$  in the glucose sample were selected and plotted as a clustered heatmap ( $N = 853$ ). The dendrogram above indicates the relationship between the 14 conditions.

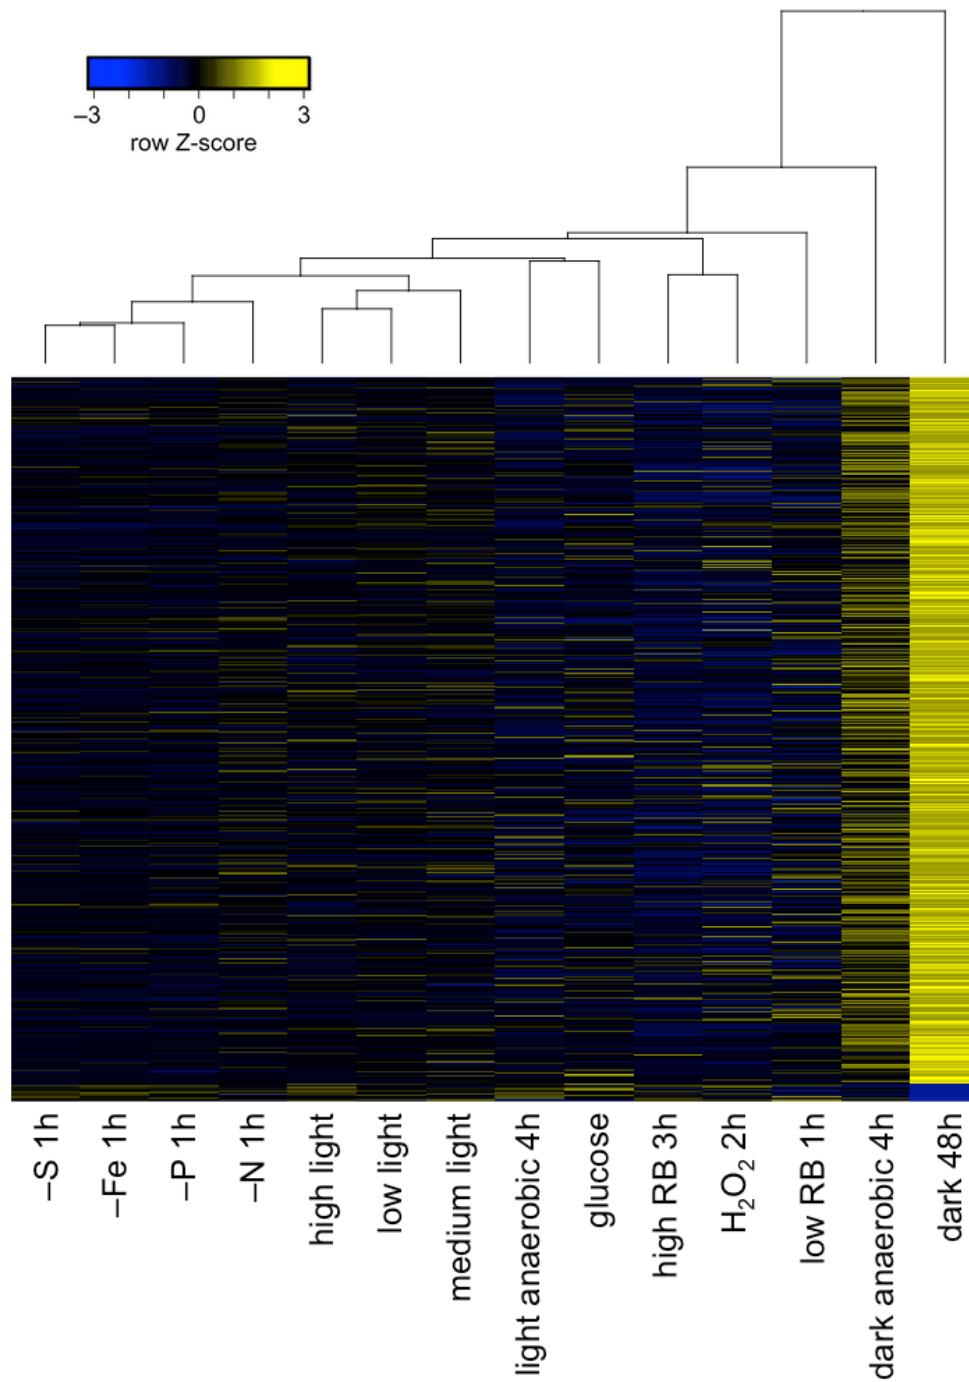

**Fig. S15.** Genes affected by growth in the dark. Transcript abundance estimates for all genes were normalized across 14 different conditions. Those with a z-score  $> 2$  or  $< -2$  in the sample grown in the dark were selected and plotted as a clustered heatmap ( $N = 831$ ). The dendrogram above indicates the relationship between the 14 conditions.

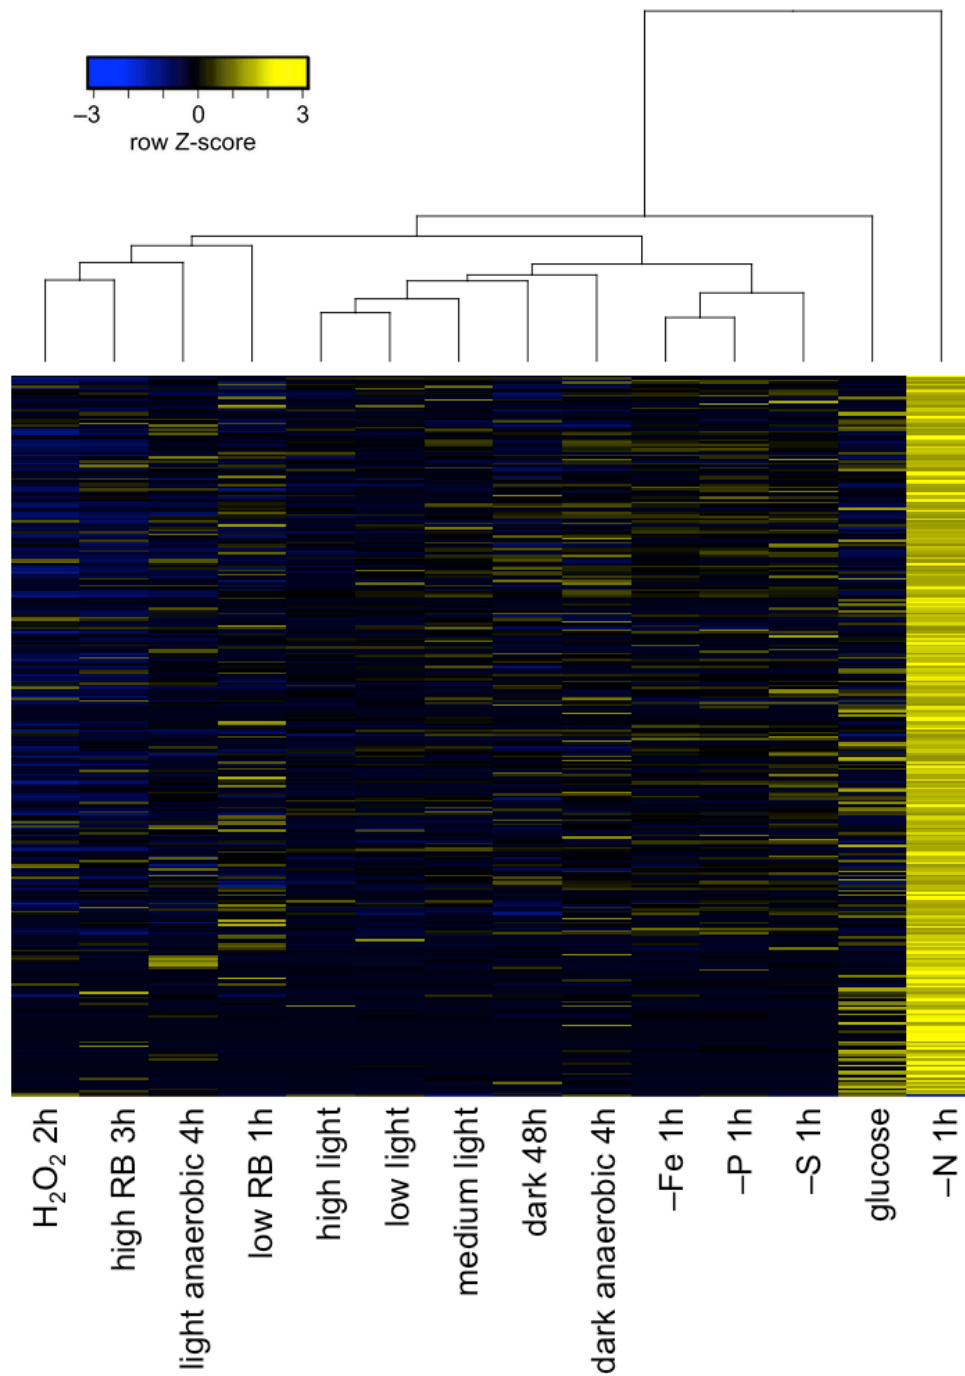

**Fig. S16.** Genes affected by growth in minus nitrogen (-N). Transcript abundance estimates for all genes were normalized across 14 different conditions. Those with a z-score > 2 or < -2 in the sample grown without N were selected and plotted as a clustered heatmap ( $N = 338$ ). The dendrogram above indicates the relationship between the 14 conditions.

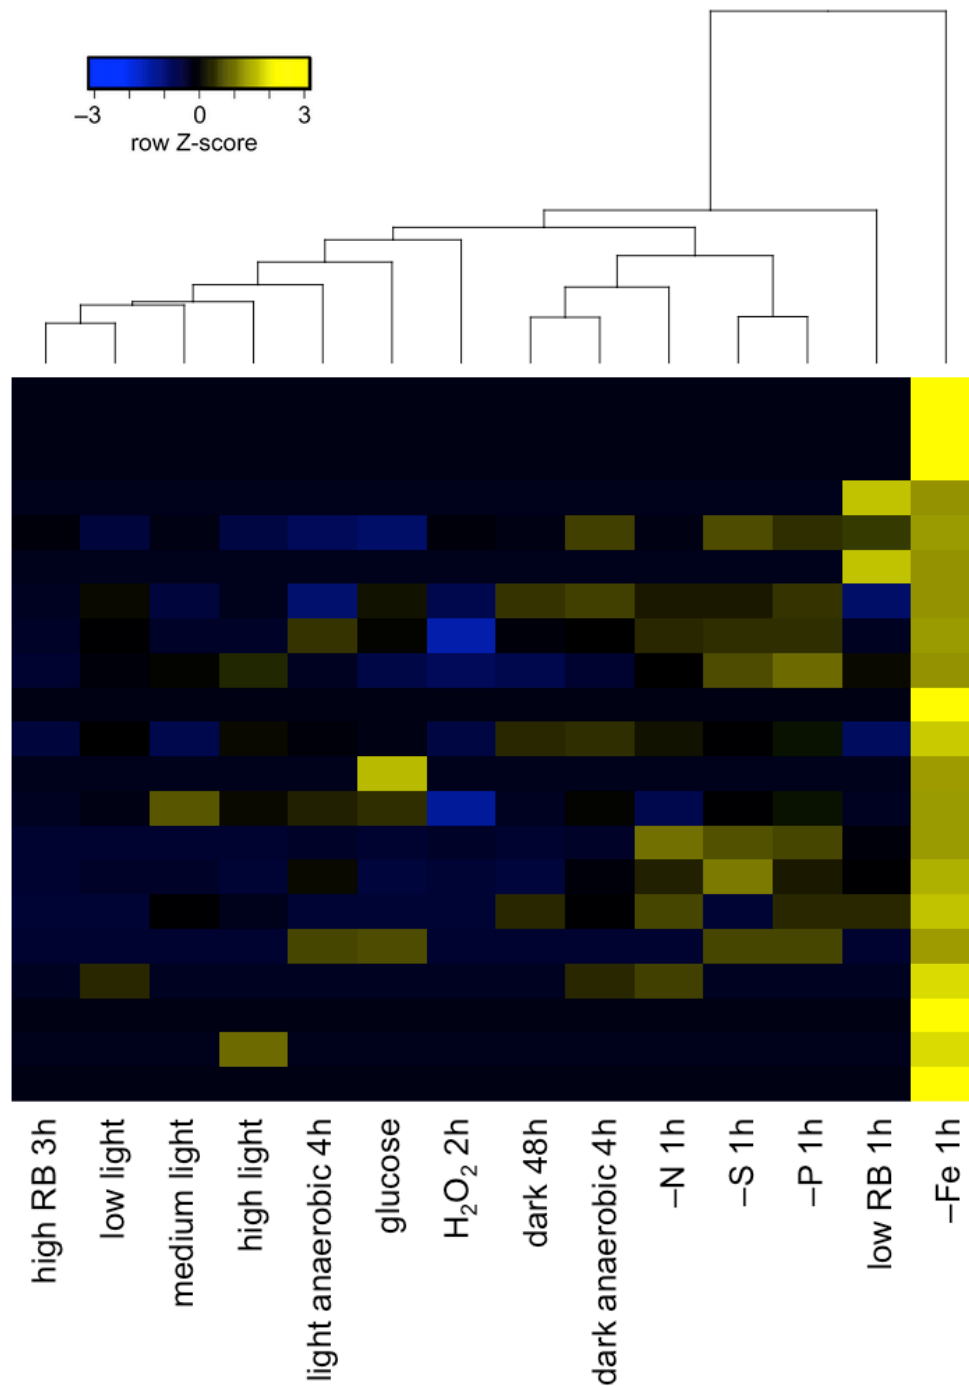

**Fig. S17.** Genes affected by growth in minus iron (-Fe). Transcript abundance estimates for all genes were normalized across 14 different conditions. Those with a z-score > 2 or < -2 in the sample grown without Fe were selected and plotted as a clustered heatmap ( $N = 21$ ). The dendrogram above indicates the relationship between the 14 conditions.

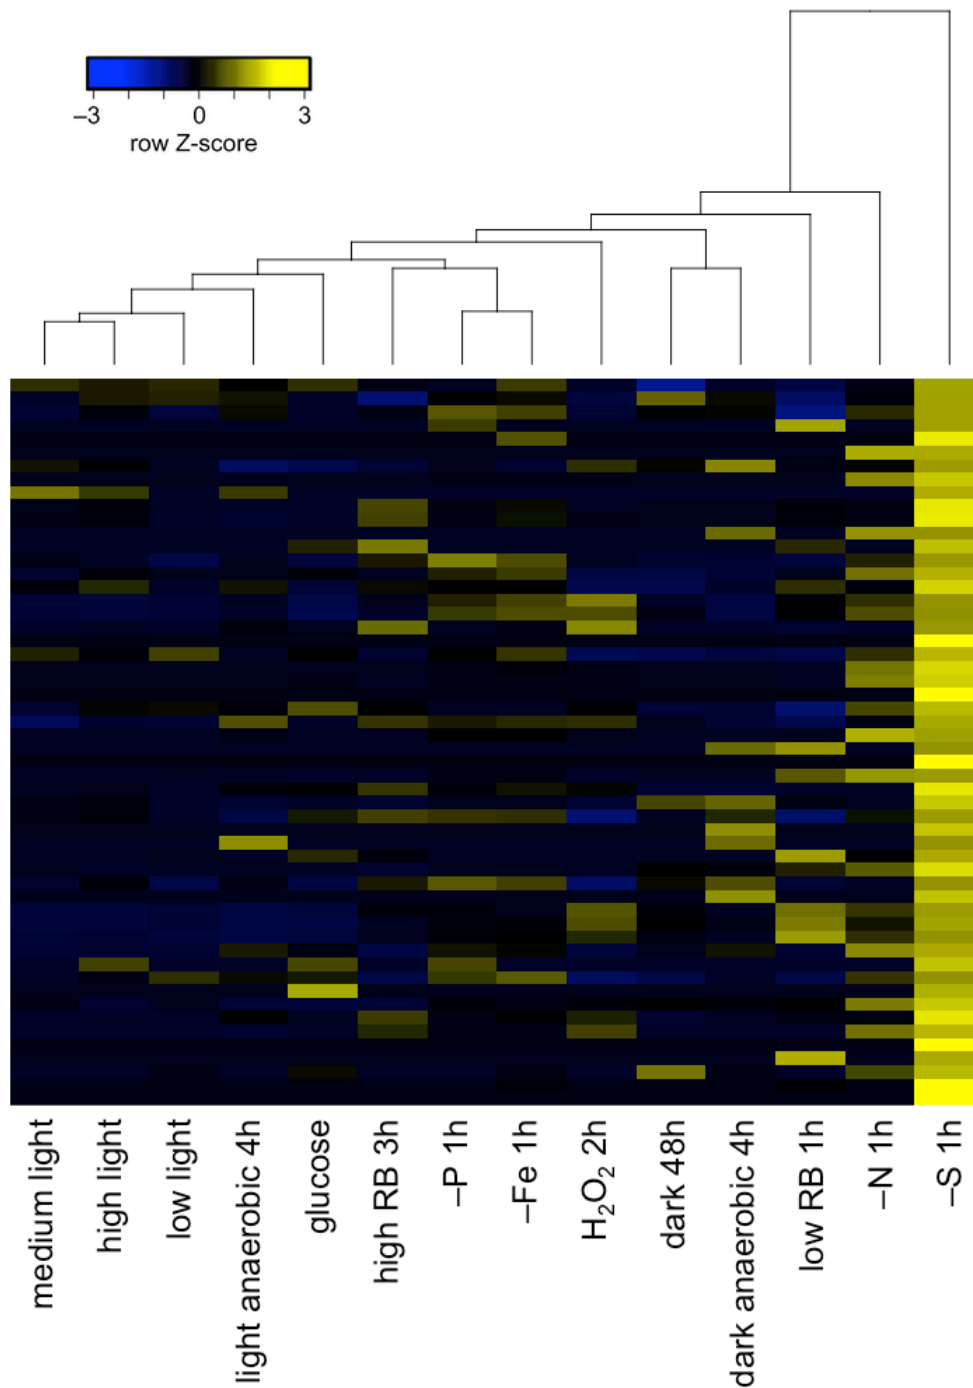

**Fig. S18.** Genes affected by growth in minus sulfur (-S). Transcript abundance estimates for all genes were normalized across 14 different conditions. Those with a z-score > 2 or < -2 in the sample grown without S were selected and plotted as a clustered heatmap ( $N = 54$ ). The dendrogram above indicates the relationship between the 14 conditions.

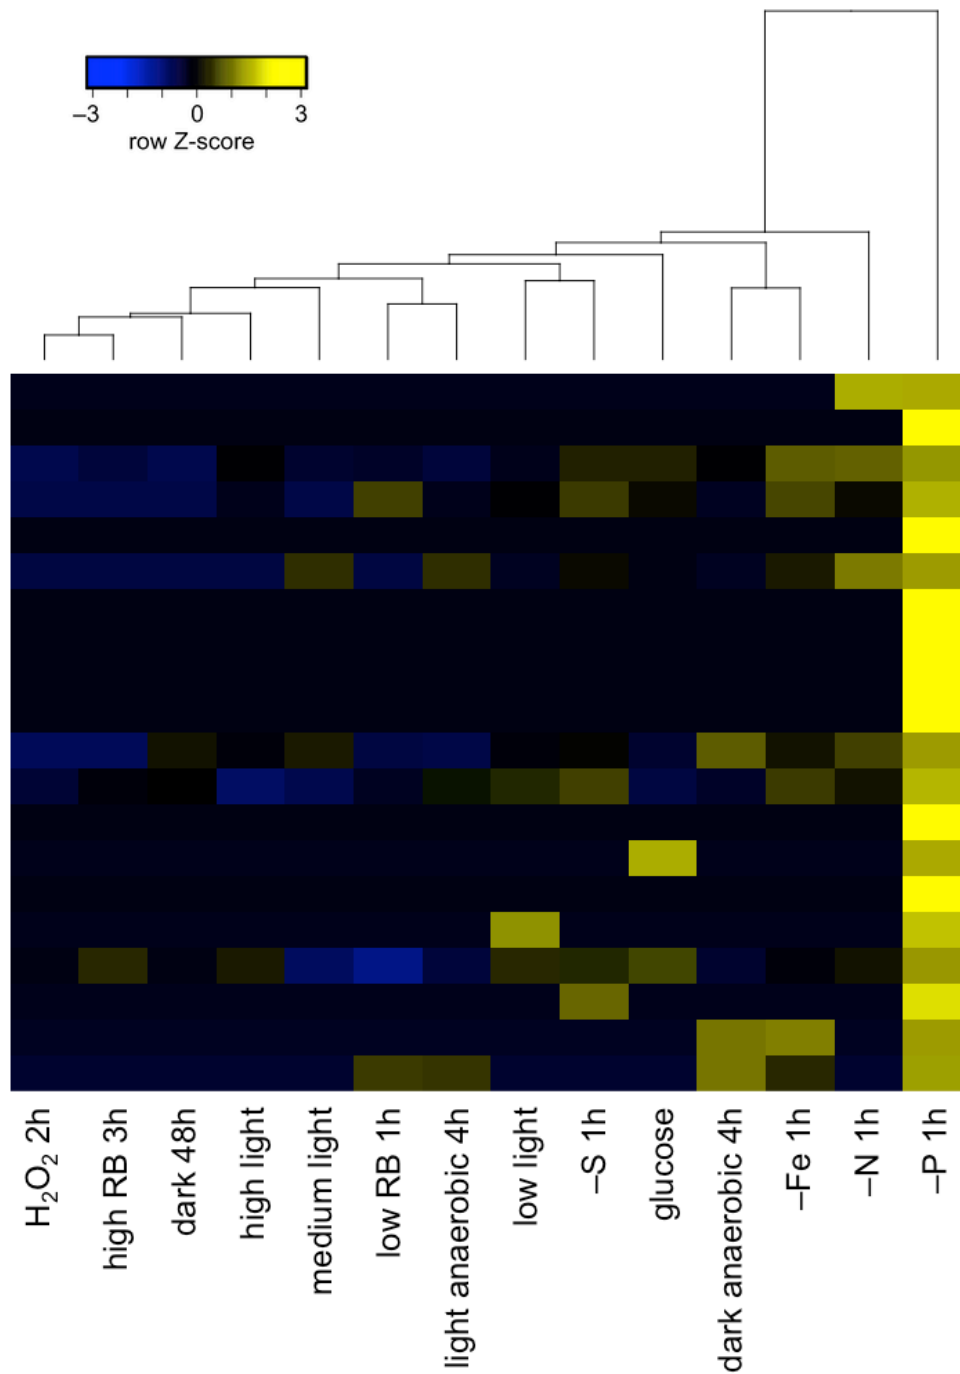

**Fig. S19.** Genes affected by growth in minus phosphorus (-P). Transcript abundance estimates for all genes were normalized across 14 different conditions. Those with a z-score > 2 or < -2 in the sample grown without P were selected and plotted as a clustered heatmap ( $N = 20$ ). The dendrogram above indicates the relationship between the 14 conditions.



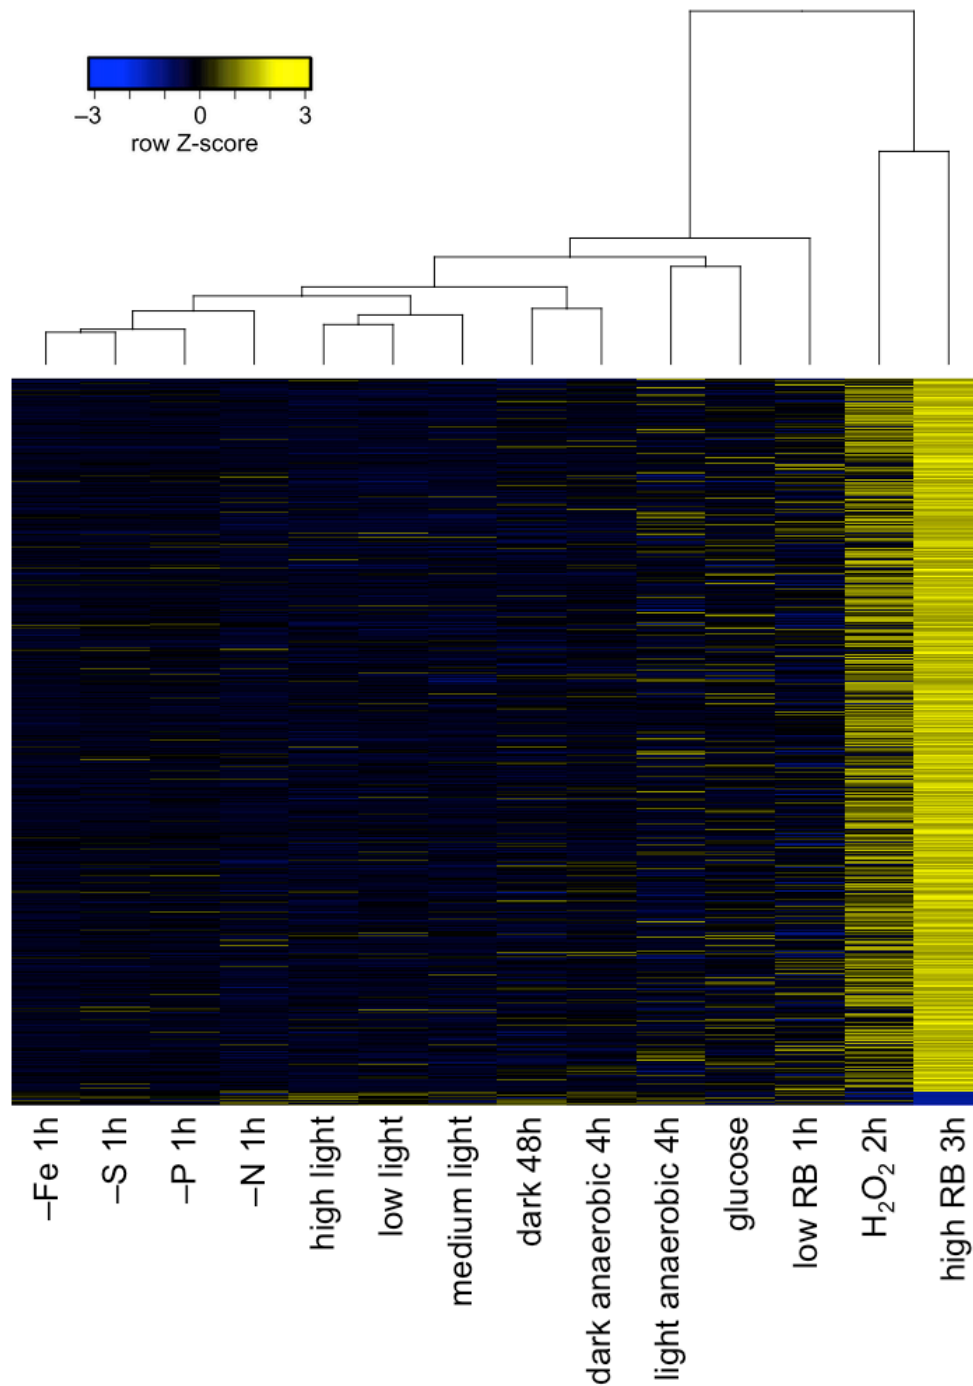

**Fig. S20.** Genes affected by growth in high rose bengal. Transcript abundance estimates for all genes were normalized across 14 different conditions. Those with a z-score  $> 2$  or  $< -2$  in the high rose bengal treated sample were selected and plotted as a clustered heatmap ( $N = 1,477$ ). The dendrogram above indicates the relationship between the 14 conditions.

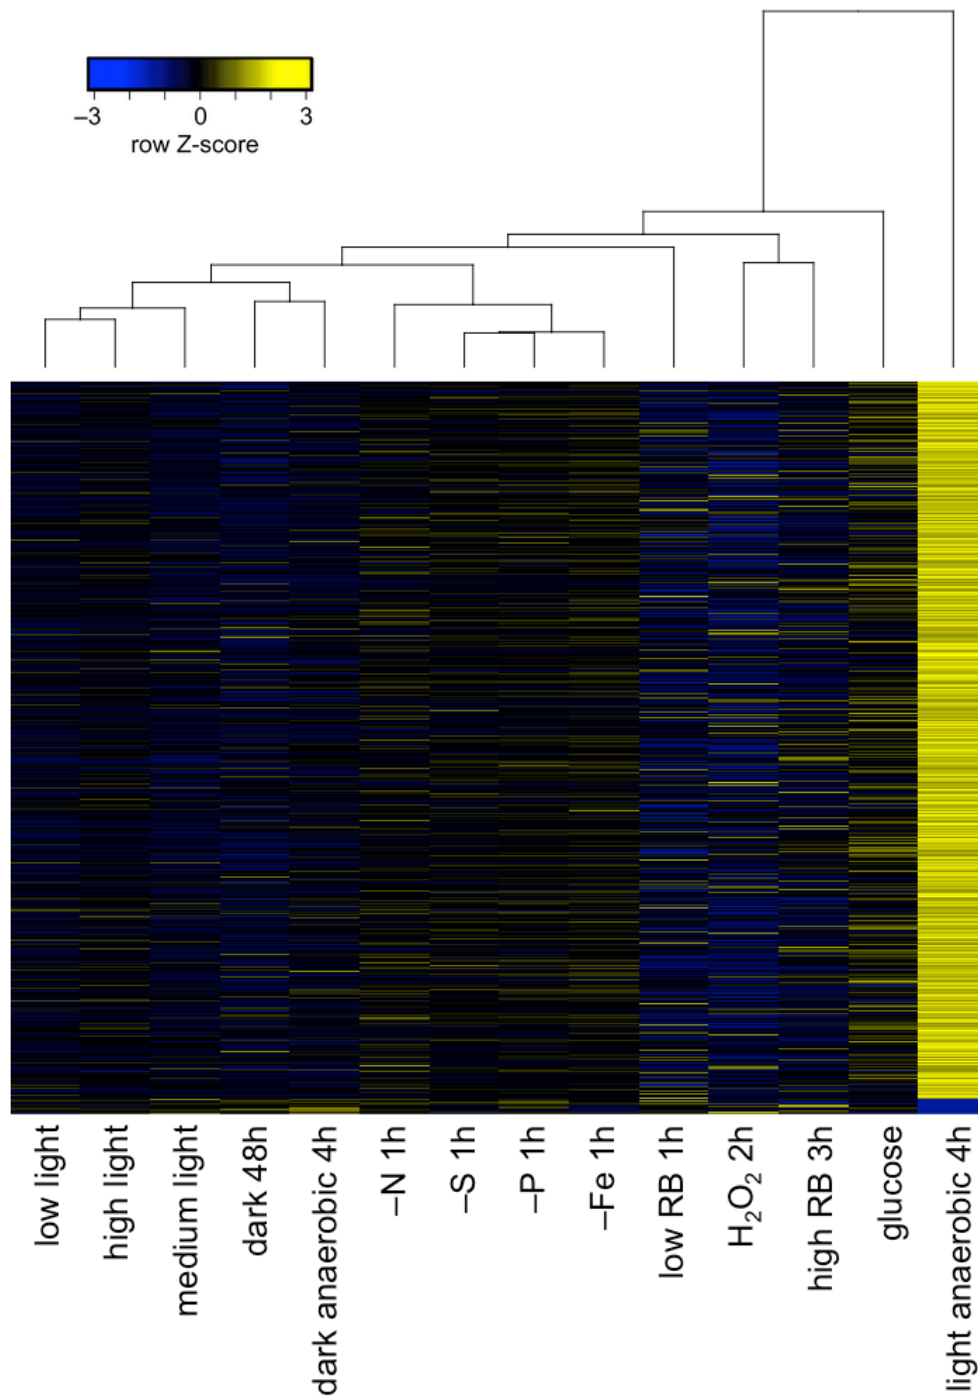

**Fig. S21.** Genes affected by anaerobic growth. Transcript abundance estimates for all genes were normalized across 14 different conditions. Those with a z-score  $> 2$  or  $< -2$  in the anaerobic growth sample were selected and plotted as a clustered heatmap ( $N = 1,308$ ). The dendrogram above indicates the relationship between the 14 conditions.

SI Tables

**Table S1. Features of the *Chromochloris zofingiensis* genome in comparison to selected previously sequenced genomes.** The *C. zofingiensis* genome was compared to four other green algal genomes (*Chlamydomonas reinhardtii*, *Coccomyxa subellipsoidea* C-169, *Chlorella* sp. NC64A, and *Monoraphidium neglectum*) and the model plant *Arabidopsis thaliana*. Quantities were generally computed with uniform rules applied to most recently available genome assemblies and annotation releases (SI Appendix, SI Text).

|                                                                                       | <i>Coccomyxa subellipsoidea</i> C-169                                                                                                 | <i>Chromochloris zofingiensis</i>                                                                                                   | <i>Arabidopsis thaliana</i>              | <i>Chlamydomonas reinhardtii</i>                                                            | <i>Chlorella</i> sp. NC64A                                           | <i>Monoraphidium neglectum</i>                                            |
|---------------------------------------------------------------------------------------|---------------------------------------------------------------------------------------------------------------------------------------|-------------------------------------------------------------------------------------------------------------------------------------|------------------------------------------|---------------------------------------------------------------------------------------------|----------------------------------------------------------------------|---------------------------------------------------------------------------|
| <b>Nuclear genome</b>                                                                 | JGI Phytozome 2.0 assembly and gene models                                                                                            | This work ("ChrZofV5"): chroms. + unplaced + 24x copies of rDNA as single contig                                                    | TAIR10 assembly and gene models          | JGI Phytozome 5.5 assembly and gene models                                                  | JGI release 2014-08-18 assembly and "best genes" models only         | NCBI KK100223 thru KK106940 version .1 sequences and gene models          |
| Sequenced genome size                                                                 | 49 Mbp                                                                                                                                | 57 Mbp                                                                                                                              | 119 Mbp                                  | 107 Mbp                                                                                     | 42 Mbp                                                               | 67 Mbp                                                                    |
| Sequenced genome presentation                                                         | 29.5 Mbp in 12 contiguous chroms., 19.1 Mbp in 16 contiguous chrom. arms (pairing not known for half), 333 Kbp in 17 unplaced contigs | 54.4 Mbp in 19 chroms. (4 ctg. + 15 scaf.), 2.4 Mbp in 198 unplaceds (171 ctg. + 27 scaf.), 9.7 Kbp in 1 canonical rDNA unit contig | 119.0 Mbp in 5 scaffolded chromosomes    | 105.1 Mbp in 17 scaffolded chromosomes, 2.0 Mbp in 37 unplaceds (15 contigs + 22 scaffolds) | 41.9 Mbp in 216 unplaced scaffolds + 322 Kbp in 198 unplaced contigs | 43.4 Mbp in 3,257 unplaced scaffolds + 23.7 Mbp in 3,461 unplaced contigs |
| <b>Sequenced genome: total # of stretches of pure "A"/"C"/"G"/"T" basepairs</b>       | <b>45</b>                                                                                                                             | <b>296</b>                                                                                                                          | <b>359</b>                               | <b>1,547</b>                                                                                | <b>3,957</b>                                                         | <b>12,074</b>                                                             |
| Genome project primary initial strategy, average basepair coverage at earliest stage  | Sanger WGS, ≈12x                                                                                                                      | HiSeq PE100, ≈460x                                                                                                                  | BAC/PI/TAC, complex chromosomes/arms     | Plasmid/fosmid, ≈13x chromosomes                                                            | Sanger WGS, ≈9x                                                      | MiSeq PE250, ≈49x                                                         |
| Scaffold N50 (taking genome size as sum of scaffolds as-are)                          | 1,960 Kbp                                                                                                                             | 1,444 Kbp                                                                                                                           | 10,898 Kbp                               | 215 Kbp                                                                                     | 1,470 Kbp                                                            | 16 Kbp                                                                    |
| Contig N50 (taking genome size as sum of contigs as-are)                              | 1,960 Kbp                                                                                                                             | 1,444 Kbp                                                                                                                           | 10,898 Kbp                               | 215 Kbp                                                                                     | 28 Kbp                                                               | 9 Kbp                                                                     |
| Number of chromosomes                                                                 | 20 (asm. subtel./PFGE/Southern)                                                                                                       | 19 (optical map)                                                                                                                    | 5 (incontrovertible)                     | 17 (linkage groups)                                                                         | 12 (PFGE/asm. subtel.)                                               | unknown, no estimate                                                      |
| Percent G+C in sequenced genome                                                       | 53%                                                                                                                                   | 51%                                                                                                                                 | 36%                                      | 64%                                                                                         | 67%                                                                  | 65%                                                                       |
| Basepairs called as coding (in any transcript model) in sequenced genome              | 25%                                                                                                                                   | 39%                                                                                                                                 | 28%                                      | 37%                                                                                         | 32%                                                                  | 26%                                                                       |
| Percent G+C in basepairs called as coding (in any transcript model)                   | 61%                                                                                                                                   | 53%                                                                                                                                 | 44%                                      | 70%                                                                                         | 69%                                                                  | 70%                                                                       |
| Number of called protein-coding gene loci (collapsing transcript forms)               | 9,629                                                                                                                                 | 15,274                                                                                                                              | 27,206                                   | 17,741                                                                                      | 9,791                                                                | 16,734                                                                    |
| Number of "complete" called protein-coding gene loci (collapsing transcripts)         | 8,815                                                                                                                                 | 15,194                                                                                                                              | 27,197                                   | 17,685                                                                                      | 8,509                                                                | 14,268                                                                    |
| Number of rDNA units estimated to exist in true monoploid genome                      | unknown, no estimate                                                                                                                  | ≈24 on chrom. 13                                                                                                                    | ≈375 NOR2 + 375 NOR4                     | ≈840 total chr. 1+7+15                                                                      | unknown, no estimate                                                 | ≈23 total                                                                 |
| Number of tRNAs called in sequenced genome                                            | 91                                                                                                                                    | 75                                                                                                                                  | 631                                      | 259                                                                                         | 43                                                                   | 38                                                                        |
| Taking a single representative transcript model per called protein-coding gene locus: |                                                                                                                                       |                                                                                                                                     |                                          |                                                                                             |                                                                      |                                                                           |
| Number of amino acids: average                                                        | 427 aa                                                                                                                                | 482 aa                                                                                                                              | 407 aa                                   | 736 aa                                                                                      | 456 aa                                                               | 348 aa                                                                    |
| Number of amino acids: median                                                         | 333 aa                                                                                                                                | 347 aa                                                                                                                              | 350 aa                                   | 500 aa                                                                                      | 358 aa                                                               | 265 aa                                                                    |
| Number of exons containing coding sequence: average                                   | 8.1                                                                                                                                   | 5.0                                                                                                                                 | 5.2                                      | 8.5                                                                                         | 8.3                                                                  | 5.0                                                                       |
| Number of exons containing coding sequence: median                                    | 7                                                                                                                                     | 4                                                                                                                                   | 3                                        | 7                                                                                           | 7                                                                    | 4                                                                         |
| Exon length (restricted to coding sequence): average                                  | 159 nt                                                                                                                                | 291 nt                                                                                                                              | 237 nt                                   | 261 nt                                                                                      | 166 nt                                                               | 207 nt                                                                    |
| Exon length (restricted to coding sequence): median                                   | 144 nt                                                                                                                                | 194 nt                                                                                                                              | 133 nt                                   | 133 nt                                                                                      | 119 nt                                                               | 129 nt                                                                    |
| Intron length (between exons with coding sequence): average                           | 284 nt                                                                                                                                | 267 nt                                                                                                                              | 157 nt                                   | 269 nt                                                                                      | 207 nt                                                               | 302 nt                                                                    |
| Intron length (between exons with coding sequence): median                            | 246 nt                                                                                                                                | 260 nt                                                                                                                              | 98 nt                                    | 228 nt                                                                                      | 171 nt                                                               | 254 nt                                                                    |
| Percentage with at least one intron (between exons with coding sequence)              | 94%                                                                                                                                   | 82%                                                                                                                                 | 76%                                      | 92%                                                                                         | 98%                                                                  | 82%                                                                       |
| % of seq. basepairs RepeatMasker'd with Repbase Update "eukaryotic"                   | 2.2%                                                                                                                                  | 3.7%                                                                                                                                | 18.0%                                    | 17.8%                                                                                       | 8.9%                                                                 | 8.1%                                                                      |
| % of seq. basepairs RepeatMasker'd with RepeatModeler                                 | 5.7%                                                                                                                                  | 4.5%                                                                                                                                | 16.9%                                    | 21.8%                                                                                       | 12.3%                                                                | 8.9%                                                                      |
| % of seq. basepairs RepeatMasker'd with RepeatModeler + Repbase Update "eukaryo"      | 6.0%                                                                                                                                  | 5.9%                                                                                                                                | 20.8%                                    | 23.0%                                                                                       | 12.6%                                                                | 9.3%                                                                      |
| <b>Chloroplast genome</b>                                                             | NCBI NC_015084.1 (with one gap and no large inv. rpt.) and annots.                                                                    | This work ("ChrZofV5")                                                                                                              | NCBI AP000423.1 sequence and annotations | NCBI FJ423446.1 sequence and annotations                                                    | NCBI KP271969.1 sequence (no large inv. rpt.) and annotations        | NCBI CM002678.1 seq., paper's annotations                                 |
| Sequenced genome size                                                                 | 176 Kbp                                                                                                                               | 181 Kbp                                                                                                                             | 154 Kbp                                  | 204 Kbp                                                                                     | 125 Kbp                                                              | 135 Kbp                                                                   |
| Number of annotated protein-coding genes, including hypotheticals                     | 80                                                                                                                                    | 71                                                                                                                                  | 86                                       | 67 + 1 ncRNA (tscA)                                                                         | 79                                                                   | 67                                                                        |
| Number of annotated rRNAs                                                             | 3                                                                                                                                     | 6                                                                                                                                   | 8                                        | 10                                                                                          | 3                                                                    | 6                                                                         |
| Number of annotated tRNAs                                                             | 32                                                                                                                                    | 31                                                                                                                                  | 37                                       | 29                                                                                          | 31                                                                   | 29                                                                        |
| Percent G+C in sequenced genome                                                       | 51%                                                                                                                                   | 31%                                                                                                                                 | 36%                                      | 34%                                                                                         | 34%                                                                  | 32%                                                                       |
| <b>Mitochondrial genome</b>                                                           | NCBI NC_015316.1 sequence and annotations                                                                                             | This work ("ChrZofV5")                                                                                                              | NCBI JF729201.1 sequence and annotations | NCBI NC_001638.1 sequence and annotations                                                   | NCBI NC_025413.1 sequence and annotations                            | NCBI CM002677.1 seq. (with two gaps) and annotations                      |
| Sequenced genome size                                                                 | 65 Kbp                                                                                                                                | 42 Kbp                                                                                                                              | 367 Kbp                                  | 16 Kbp                                                                                      | 78 Kbp                                                               | 93 Kbp                                                                    |
| Number of annotated protein-coding genes, including hypotheticals                     | 31                                                                                                                                    | 22                                                                                                                                  | 32                                       | 8                                                                                           | 32                                                                   | 17                                                                        |
| Number of annotated rRNAs                                                             | 3                                                                                                                                     | 6                                                                                                                                   | 3                                        | 14                                                                                          | 3                                                                    | 0                                                                         |
| Number of annotated tRNAs                                                             | 26                                                                                                                                    | 24                                                                                                                                  | 21                                       | 3                                                                                           | 27                                                                   | 23                                                                        |
| Percent G+C in sequenced genome                                                       | 53%                                                                                                                                   | 36%                                                                                                                                 | 45%                                      | 45%                                                                                         | 28%                                                                  | 46%                                                                       |

**Table S2. Homology Determination by BLAST of NCBI Gene Accessions in *Chromochloris zofingiensis*.**

| NCBI Accession | NCBI Gene Symbol | Record Type | Size, NT | <i>C.zofingiensis</i> gene ID | <i>C.zofingiensis</i> gene symbol | <i>C.zofingiensis</i> locus             | BLAST Identities | BLAST Gaps   |
|----------------|------------------|-------------|----------|-------------------------------|-----------------------------------|-----------------------------------------|------------------|--------------|
| GQ996718.1     | <i>BC</i>        | gDNA        | 4681     | Cz13g10110                    | none                              | chr13:1039758-1044449                   | 4659/4701 (99%)  | 29/4701 (1%) |
| AY772714.1     | <i>BKT</i>       | gDNA        | 2966     | Cz13g13100                    | <i>BKTI</i>                       | chr13:1335024-1337989                   | 2960/2967 (100%) | 2/2967 (0%)  |
| FN563999.1     | <i>LCYB</i>      | gDNA        | 3683     | Cz12g10170                    | <i>LCYB</i>                       | chr12:1059448-1063130                   | 3682/3683 (99%)  | 0/3683 (0%)  |
| HE664108.1     | <i>LCYE</i>      | gDNA        | 3973     | Cz09g18310                    | <i>LCYE</i>                       | chr09:1898540-1902502                   | 3963/3963 (100%) | 0/3963 (0%)  |
| KC316012.1     | <i>NITI</i>      | gDNA        | 3448     | Cz14g14210                    | none                              | chr14:1478407-1481856                   | 3448/3450 (99%)  | 2/3450 (0%)  |
| EF621406.1     | <i>PDS</i>       | gDNA        | 6713     | Cz02g32280                    | <i>PDS</i>                        | chr02:3304203-3297493                   | 6701/6717 (99%)  | 10/6717 (0%) |
| FR670784.1     | <i>PSY</i>       | gDNA        | 3561     | Cz05g32220                    | <i>PSY</i>                        | chr05:3275040-3278591                   | 3552/3553 (99%)  | 1/3553 (0%)  |
| KC316010.1     | <i>RBCS</i>      | gDNA        | 2580     | Cz17g13100                    | <i>RBCS</i>                       | chr17:1344226-1346748                   | 2511/2523 (99%)  | 12/2523 (0%) |
| GQ996720.1     | <i>SAD</i>       | gDNA        | 3479     | Cz04g09090                    | <i>SACPDI</i>                     | chr04:926651-930102                     | 3424/3466 (99%)  | 28/3466 (1%) |
| HE863826.1     | <i>ZEP</i>       | gDNA        | 5687     | Cz07g30060                    | <i>ZEP1</i>                       | chr07:3027178-3032856                   | 5679/5679 (100%) | 0/5679 (0%)  |
| EU016205.1     | <i>CHYB</i>      | mRNA        | 1545     | Cz12g16080                    | <i>CHYB</i>                       |                                         |                  |              |
|                |                  |             | 1-534    |                               |                                   | chr12:1634792-1635325                   | 534/534 (100%)   | 0/534 (0%)   |
|                |                  |             | 534-623  |                               |                                   | chr12:1635520-1635609                   | 89/90 (99%)      | 0/90 (0%)    |
|                |                  |             | 614-779  |                               |                                   | chr12:1635818-1635983                   | 166/166 (100%)   | 0/166 (0%)   |
|                |                  |             | 779-891  |                               |                                   | chr12:1636203-1636315                   | 113/113 (100%)   | 0/113 (0%)   |
|                |                  |             | 889-1531 |                               |                                   | chr12:1636599-1637241                   | 640/643 (99%)    | 0/643 (0%)   |
| GM040753.1     | “Sequence 1”     | mRNA        | 1153     | Cz13g13100                    | <i>BKTI</i>                       |                                         |                  |              |
|                |                  |             | 7-210    |                               |                                   | likely cloning vector pAC106 or similar |                  |              |
|                |                  |             | 209-361  |                               |                                   | chr13:1337779-1337627                   | 153/153 (100%)   | 0/153 (0%)   |
|                |                  |             | 358-577  |                               |                                   | chr13:1337388-1337169                   | 220/220 (100%)   | 0/220 (0%)   |
|                |                  |             | 574-749  |                               |                                   | chr13:1336856-1336681                   | 176/176 (100%)   | 0/176 (0%)   |
|                |                  |             | 744-1150 |                               |                                   | chr13:1336336-1335930                   | 406/407 (99%)    | 0/407 (0%)   |

**Table S3: Putative *Chromochloris zofingiensis* gene models for photosynthesis-related and metabolic genes.**  
 For nuclear encoded genes, Predalga predictions were used to determine localization (Loc.) noted using the following abbreviations: C, chloroplast; M, mitochondria; SP, secretory pathway; and O, other which could include the nucleus or cytosol. Chloroplast encoded genes are noted with CE.

| Description                                               | Gene Name      | Gene ID    | Loc. |
|-----------------------------------------------------------|----------------|------------|------|
| <b>Carotenoid Biosynthesis</b>                            |                |            |      |
| Geranylgeranyl Pyrophosphate Synthase                     | <i>GGPS</i>    | Cz02g19200 | C    |
| Phytoene Synthase                                         | <i>PSY</i>     | Cz05g32220 | M    |
| Phytoene Desaturase                                       | <i>PDS</i>     | Cz02g32280 | C    |
| Zeta-Carotene Desaturase                                  | <i>ZDS</i>     | Cz10g17010 | C    |
| Zeta-Carotene Isomerase                                   | <i>ZISO</i>    | Cz10g17130 | C    |
| Carotene Isomerase                                        | <i>CRTISO1</i> | Cz12g03260 | O    |
| Lycopene Epsilon-Cyclase                                  | <i>LCYE</i>    | Cz09g18310 | C    |
| Lycopene Beta-Cyclase                                     | <i>LCYB</i>    | Cz12g10170 | O    |
| Cytochrome P450-Type Carotene Hydroxylase ( <i>LUT5</i> ) | <i>CYP97A1</i> | Cz13g16110 | C    |
|                                                           | <i>CYP97A2</i> | Cz09g14130 | O    |
| Beta-Carotene Hydroxylase                                 | <i>CHYB</i>    | Cz12g16080 | O    |
| Cytochrome P450-Type Carotene Hydroxylase ( <i>LUT1</i> ) | <i>CYP97C</i>  | Cz09g07100 | C    |
| Chlorophycean Violaxanthin De-Epoxidase                   | <i>CVDE</i>    | Cz13g15030 | O    |
| Zeaxanthin Epoxidase                                      | <i>ZEP1</i>    | Cz07g30060 | SP   |
|                                                           | <i>ZEP2</i>    | Cz05g31040 | O    |
| Neoxanthin Synthase ( <i>ABA4</i> )                       | <i>NSY</i>     | Cz15g04070 | C    |
| Beta-Ketolase                                             | <i>BKT1</i>    | Cz13g13100 | O    |
|                                                           | <i>BKT2</i>    | Cz04g11250 | O    |
| CruP-Type Lycopene Cyclase Paralog                        | <i>CRUP</i>    | Cz07g07080 | M    |
| <b>NPQ</b>                                                |                |            |      |
| Light-Harvesting Complex Stress Response (LI818)          | <i>LHCSR</i>   | Cz16g02040 | C    |
| Photosystem II Subunit S                                  | <i>PSBS</i>    | Cz03g01250 | C    |
| <b>Chlorophyll Biosynthesis</b>                           |                |            |      |
| Glutamyl-Glutaminyl Non-Discriminatory tRNA Synthetase    | <i>GTS1</i>    | Cz19g08190 | M    |
|                                                           | <i>GTS2</i>    | Cz16g14040 | O    |
| Glutamyl tRNA Reductase                                   | <i>GTR</i>     | Cz03g02090 | O    |
| Glutamate-Semialdehyde Aminotransferase                   | <i>GSA</i>     | Cz11g23070 | C    |
| Delta-Aminolevulinic Acid Dehydratase                     | <i>ALAD</i>    | Cz09g03180 | C    |
| Porphobilinogen Deaminase                                 | <i>PBGD1</i>   | Cz03g22200 | C    |
|                                                           | <i>PBGD2</i>   | Cz04g12200 | O    |
| Uroporphyrinogen III Synthase                             | <i>UROS1</i>   | Cz14g24240 | O    |
|                                                           | <i>UROS2</i>   | Cz12g20200 | SP   |
| Uroporphyrinogen III Decarboxylase                        | <i>UROD1</i>   | Cz14g23190 | C    |

|                                                              |              |            |    |
|--------------------------------------------------------------|--------------|------------|----|
|                                                              | <i>UROD2</i> | Cz16g13070 | C  |
| Coproporphyrinogen-III Oxidase                               | <i>CPOX1</i> | Cz06g22110 | C  |
|                                                              | <i>CPOX2</i> | Cz18g10090 | O  |
|                                                              | <i>CPOX3</i> | Cz01g34010 | SP |
| Protoporphyrinogen IX Oxidase                                | <i>PPOX</i>  | Cz02g42010 | C  |
| Mg-Chelatase Subunit I                                       | <i>CHLI1</i> | Cz06g16260 | O  |
|                                                              | <i>CHLI2</i> | UNPLg00024 | O  |
| Mg-Chelatase Subunit H                                       | <i>CHLH1</i> | Cz14g15070 | C  |
|                                                              | <i>CHLH2</i> | Cz06g36090 | C  |
| Mg-Chelatase Subunit D                                       | <i>CHLD</i>  | Cz08g03270 | O  |
| Tetrapyrrole Binding Protein                                 | <i>GUN4</i>  | Cz11g24180 | O  |
| Mg-Protoporphyrin IX Methyltransferase                       | <i>CHLM</i>  | Cz02g24270 | O  |
| Mg-Protoporphyrin Monomethyl Ester Cyclase                   | <i>CRD1</i>  | Cz16g08310 | C  |
| Ycf 54 Conserved Hypothetical Protein                        | <i>YCF54</i> | Cz19g06290 | C  |
| Divinyl Chlorophyllide <i>a</i> 8-Vinyl Reductase            | <i>DVR</i>   | Cz03g06230 | C  |
| Light-Dependent Protochlorophyllide Oxidoreductase           | <i>POR</i>   | Cz06g28160 | C  |
| Light-Independent Protochlorophyllide Oxidoreductase Complex | <i>chlN</i>  | CzCPg00090 | CE |
|                                                              | <i>chlB</i>  | CzCPg00300 | CE |
|                                                              | <i>chlL</i>  | CzCPg01150 | CE |
| Chlorophyll Synthetase                                       | <i>CHLG</i>  | Cz08g28070 | M  |
| Chlorophyllide <i>a</i> Oxygenase                            | <i>CAO1</i>  | Cz10g28270 | C  |
|                                                              | <i>CAO2</i>  | Cz14g04140 |    |

---

### Chlorophyll Degradation

---

|                                   |             |            |    |
|-----------------------------------|-------------|------------|----|
| Pheophorbide <i>a</i> Oxygenase   | <i>PAO1</i> | Cz08g09050 | O  |
|                                   | <i>PAO2</i> | Cz06g27150 | C  |
|                                   | <i>PAO3</i> | Cz14g19030 | C  |
|                                   | <i>PAO4</i> | Cz14g25130 | O  |
|                                   | <i>PAO5</i> | Cz16g19110 | SP |
| Chlorophyllide <i>b</i> Reductase | <i>NYC1</i> | Cz08g00200 | M  |
|                                   | <i>NOL</i>  | Cz09g17200 | C  |
| Pheophytinase                     | <i>PPH1</i> | Cz02g13050 | C  |
| Pale Cress Etiolation Regulator   | <i>PAC</i>  | Cz12g26270 | O  |
| Non-Yellowing                     | <i>NYE1</i> | Cz10g29110 | O  |

---

### Heme Biosynthesis and Metabolism

---

|                                      |              |            |   |
|--------------------------------------|--------------|------------|---|
| Ferrochelatase                       | <i>FC</i>    | Cz16g21260 | C |
| Uroporphyrin III C-Methyltransferase | <i>SUMT1</i> | Cz14g07090 | O |
|                                      | <i>SUMT2</i> | Cz05g21010 | O |
| Heme Oxygenase                       | <i>HO</i>    | Cz12g15230 | C |

|              |            |   |
|--------------|------------|---|
| <i>GUN2A</i> | UNPLg00465 | C |
| <i>GUN2B</i> | UNPLg00457 | C |

---

### Cytochrome Complexes and Soluble Electron Carriers

---

|                                                 |              |            |    |
|-------------------------------------------------|--------------|------------|----|
| Cyt <i>f</i>                                    | <i>petA</i>  | CzCPg01130 | CE |
| Cyt <i>b<sub>6</sub></i>                        | <i>petB</i>  | CzCPg01070 | CE |
| 2Fe-2S Rieske Protein                           | <i>PETC</i>  | Cz13g12160 | C  |
| Cyt <i>b<sub>6</sub>f</i> Subunit IV            | <i>petD</i>  | CzCPg01120 | CE |
| Cyt <i>b<sub>6</sub>f</i> Subunit G             | <i>petG</i>  | CzCPg00150 | CE |
| Cyt <i>b<sub>6</sub>f</i> Subunit L             | <i>petL</i>  | CzCPg00240 | CE |
| Cyt <i>b<sub>6</sub>f</i> Subunit VII           | <i>PETM</i>  | Cz07g02140 | C  |
| Cyt <i>b<sub>6</sub>f</i> Subunit VIII          | <i>PETN</i>  | Cz16g12040 | C  |
| Cyt <i>b<sub>6</sub>f</i> Subunit V             | <i>PETO</i>  | Cz06g16040 | C  |
| Plastocyanin                                    | <i>PETE</i>  | Cz01g35130 | C  |
| Ferredoxin                                      | <i>PETF</i>  | Cz07g28150 | C  |
|                                                 | <i>FDX2</i>  | Cz13g08120 | C  |
|                                                 | <i>FDX3</i>  | Cz11g03180 | O  |
|                                                 | <i>FDX4</i>  | Cz13g08015 | C  |
|                                                 | <i>FDX5</i>  | Cz07g16090 | SP |
|                                                 | <i>FDX6</i>  | Cz11g16050 | O  |
|                                                 | <i>FDX7</i>  | Cz14g22270 | C  |
| Ferredoxin NADP Reductase                       | <i>FNR</i>   | Cz02g17180 | C  |
| Cyt <i>c<sub>6</sub></i>                        | <i>PETJ</i>  | Cz01g35120 | O  |
| Cyt <i>c</i>                                    | <i>CYC4</i>  | Cz17g14110 | O  |
| Fe-S Cluster Assembly Factor                    | <i>ISC1</i>  | Cz08g08230 | C  |
| Cyt <i>c</i> -Type Biogenesis Factor            | <i>CCDA1</i> | Cz08g31010 | C  |
|                                                 | <i>CCB1</i>  | Cz02g33170 | C  |
|                                                 | <i>CCB2</i>  | Cz02g07090 | O  |
|                                                 | <i>CCB4</i>  | Cz17g14140 | O  |
| Ferredoxin-Thioredoxin Reductase, alpha Subunit | <i>FTRV</i>  | Cz12g03230 | C  |
| Ferredoxin-Thioredoxin Reductase, beta Subunit  | <i>FTRC</i>  | Cz01g33170 | O  |

---

### Photosystem I

---

|                         |                   |            |    |
|-------------------------|-------------------|------------|----|
| Photosystem I Subunit A | <i>psaA exon1</i> | CzCPg01210 | CE |
|                         | <i>psaA exon2</i> | CzCPg00200 | CE |
|                         | <i>psaA exon3</i> | CzCPg00270 | CE |
| Photosystem I Subunit B | <i>psaB</i>       | CzCPg01360 | CE |
| Photosystem I Subunit C | <i>psaC</i>       | CzCPg00250 | CE |
| Photosystem I Subunit D | <i>PSAD</i>       | Cz05g36030 | C  |
| Photosystem I Subunit E | <i>PSAE</i>       | Cz04g01180 | C  |
| Photosystem I Subunit F | <i>PSAF</i>       | Cz13g06010 | C  |

|                         |             |            |    |
|-------------------------|-------------|------------|----|
| Photosystem I Subunit G | <i>PSAG</i> | Cz06g31280 | C  |
| Photosystem I Subunit H | <i>PSAH</i> | Cz12g12230 | C  |
| Photosystem I Subunit I | <i>PSAI</i> | Cz01g05275 | C  |
| Photosystem I Subunit J | <i>psaJ</i> | CzCPg00170 | CE |
| Photosystem I Subunit K | <i>PSAK</i> | Cz06g26010 | C  |
| Photosystem I Subunit L | <i>PSAL</i> | Cz02g18180 | C  |
| Photosystem I Subunit N | <i>PSAN</i> | Cz17g10010 | SP |
| Photosystem I Subunit O | <i>PSAO</i> | Cz15g01010 | C  |

---

## Photosystem II

---

|                                             |               |            |    |
|---------------------------------------------|---------------|------------|----|
| D1                                          | <i>psbA</i>   | CzCPg00010 | CE |
| CP47                                        | <i>psbB</i>   | CzCPg00420 | CE |
| CP43                                        | <i>psbC</i>   | CzCPg00040 | CE |
| D2                                          | <i>psbD</i>   | CzCPg00210 | CE |
| Cytochrome <i>b<sub>559</sub></i> Subunit E | <i>psbE</i>   | CzCPg01190 | CE |
| Cytochrome <i>b<sub>559</sub></i> Subunit F | <i>psbF</i>   | CzCPg00130 | CE |
| Photosystem II Subunit H                    | <i>psbH</i>   | CzCPg00390 | CE |
| Photosystem II Subunit I                    | <i>psbI</i>   | CzCPg01420 | CE |
| Photosystem II Subunit J                    | <i>psbJ</i>   | CzCPg00190 | CE |
| Photosystem II Subunit K                    | <i>psbK</i>   | CzCPg00380 | CE |
| Photosystem II Subunit L                    | <i>psbL</i>   | CzCPg00140 | CE |
| Photosystem II Subunit M                    | <i>psbM</i>   | CzCPg01390 | CE |
| Photosystem II Subunit N                    | <i>psbN</i>   | CzCPg00400 | CE |
| Photosystem II Subunit O                    | <i>PSBO</i>   | Cz16g19040 | C  |
| Photosystem II Subunit P                    | <i>PSBP</i>   | Cz07g15040 | C  |
| Photosystem II Subunit P-Like               | <i>PSBPL</i>  | Cz02g18040 | C  |
| Photosystem II Subunit Q                    | <i>PSBQ1</i>  | Cz05g13170 | C  |
|                                             | <i>PSBQ2</i>  | Cz05g09100 | C  |
| Photosystem II Subunit R                    | <i>PSBR</i>   | Cz09g21140 | C  |
| Photosystem II Subunit T                    | <i>psbT</i>   | CzCPg00410 | CE |
| Photosystem II Subunit W                    | <i>PSBW</i>   | Cz19g05110 | C  |
| Photosystem II Subunit X                    | <i>PSBX</i>   | Cz17g16010 | C  |
| Photosystem II Subunit Y                    | <i>PSBY</i>   | Cz17g15140 | C  |
| Photosystem II Subunit Z                    | <i>psbZ</i>   | CzCPg01380 | CE |
| Photosystem II Subunit 27                   | <i>PSB27A</i> | Cz04g12110 | O  |
|                                             | <i>PSB27B</i> | Cz09g22190 | O  |
|                                             | <i>PSB27C</i> | Cz02g41080 | M  |
| Photosystem II Subunit 28                   | <i>PSB28</i>  | Cz13g07140 | C  |
| Photosystem II Subunit 30                   | <i>ycf12</i>  | CzCPg00290 | CE |

---

## Light Harvesting Complexes

---



|                                              |              |            |    |
|----------------------------------------------|--------------|------------|----|
| LHC Proteins Putatively Associated with PSI  | <i>LHC1</i>  | Cz01g23030 | C  |
|                                              | <i>LHC2</i>  | Cz04g04130 | C  |
|                                              | <i>LHC3</i>  | Cz04g09210 | C  |
|                                              | <i>LHC4</i>  | Cz09g32070 | C  |
|                                              | <i>LHC5</i>  | Cz10g10160 | C  |
|                                              | <i>LHC6</i>  | Cz12g16070 | C  |
|                                              | <i>LHC7</i>  | Cz15g17110 | C  |
|                                              | <i>LHC8</i>  | Cz02g14140 | C  |
|                                              | <i>LHC9</i>  | Cz16g14150 | C  |
|                                              | <i>LHC10</i> | Cz08g26140 | O  |
|                                              | <i>LHC11</i> | Cz14g01080 | C  |
|                                              | <i>LHC12</i> | Cz03g00160 | C  |
|                                              | <i>LHC13</i> | Cz08g00190 | SP |
| Minor PSII Antenna Complex CP29              | <i>LHCB4</i> | Cz03g26240 | O  |
| Minor PSII Antenna Complex CP26              | <i>LHCB5</i> | Cz08g11160 | C  |
| LHC Proteins Putatively Associated with PSII | <i>LHC14</i> | Cz04g24050 | O  |
|                                              | <i>LHC15</i> | Cz11g23240 | C  |
|                                              | <i>LHC16</i> | Cz13g03240 | C  |
|                                              | <i>LHC17</i> | Cz07g02110 | C  |
|                                              | <i>LHC18</i> | Cz07g02100 | C  |
|                                              | <i>LHC19</i> | Cz15g09060 | C  |
|                                              | <i>LHC20</i> | UNPLg00080 | C  |

---

#### ELIP and HLIP Proteins

---

|                                     |               |            |   |
|-------------------------------------|---------------|------------|---|
| Early Light-Induced Protein Homolog | <i>ELIP1</i>  | Cz07g29280 | C |
|                                     | <i>ELIP2</i>  | Cz07g30110 | M |
|                                     | <i>ELIP3</i>  | Cz14g24190 | C |
|                                     | <i>ELIP4</i>  | Cz01g42110 | C |
|                                     | <i>ELIP5</i>  | Cz02g38160 | M |
|                                     | <i>ELIP6</i>  | Cz12g27130 | C |
|                                     | <i>ELIP7</i>  | Cz17g00090 | C |
|                                     | <i>ELIP8</i>  | Cz17g16050 | O |
|                                     | <i>ELIP9</i>  | Cz03g10240 | M |
|                                     | <i>ELIP10</i> | Cz08g00120 | C |
| High Light-Induced Protein Homolog  | <i>HLIP1</i>  | Cz14g04020 | C |

---

#### Chloroplastic ATP Synthase

---

|                   |              |            |    |
|-------------------|--------------|------------|----|
| CF1 Alpha Subunit | <i>atpA</i>  | CzCPg01290 | CE |
| CF1 Beta Subunit  | <i>atpB</i>  | CzCPg01090 | CE |
| CF1 Gamma Subunit | <i>ATPC1</i> | Cz09g21130 | C  |

|                     |              |            |    |
|---------------------|--------------|------------|----|
|                     | <i>ATPC2</i> | Cz08g05010 | C  |
| CF1 Delta Subunit   | <i>ATPD</i>  | Cz05g34180 | C  |
| CF1 Epsilon Subunit | <i>atpE</i>  | CzCPg00310 | CE |
| CF0 B Subunit       | <i>atpF</i>  | CzCPg00020 | CE |
| CF0 B' Subunit      | <i>ATPG</i>  | Cz02g27060 | C  |
| CF0 C Subunit       | <i>atpH</i>  | CzCPg00030 | CE |
| CF0 A Subunit       | <i>atpI</i>  | CzCPg00180 | CE |

---

### Chloroplast Translocase Complexes

---

|                                                        |                 |            |    |
|--------------------------------------------------------|-----------------|------------|----|
| Chloroplast Inner Membrane Translocase                 | <i>TIC20A</i>   | Cz06g20080 | C  |
|                                                        | <i>TIC20B</i>   | Cz12g08220 | O  |
|                                                        | <i>TIC21A</i>   | Cz08g26130 | M  |
|                                                        | <i>TIC21B</i>   | Cz16g11150 | O  |
|                                                        | <i>TIC22</i>    | Cz07g31050 | O  |
|                                                        | <i>TIC40A</i>   | Cz02g19150 | M  |
|                                                        | <i>TIC40B</i>   | Cz02g17170 |    |
|                                                        | <i>TIC110</i>   | Cz11g07180 | C  |
| Chloroplast Outer Membrane Translocase                 | <i>TOC34</i>    | Cz09g17330 | O  |
|                                                        | <i>TOC64A</i>   | Cz06g09170 |    |
|                                                        | <i>TOC64B</i>   | Cz07g13240 |    |
|                                                        | <i>TOC75A</i>   | Cz01g30030 | C  |
|                                                        | <i>TOC75B</i>   | Cz04g11310 |    |
|                                                        | <i>TOC120</i>   | Cz03g17170 | O  |
| SRP-Independent Translocase Complex                    | <i>TATA</i>     | UNPLg00323 | M  |
|                                                        | <i>TATB</i>     | Cz09g27050 | SP |
|                                                        | <i>TATC</i>     | Cz10g05030 | C  |
| Chloroplast Signal Recognition Particle 43 kDa Subunit | <i>CPSRP43</i>  | Cz10g07010 | SP |
| Chloroplast Signal Recognition Particle Receptor       | <i>FTSY</i>     | Cz12g26150 | C  |
| Signal Recognition Particle Receptor, Alpha Subunit    | <i>CPSRP1</i>   | Cz05g34010 | SP |
| Chloroplast Signal Recognition Particle 54 kDa Subunit | <i>CPSRP54A</i> | Cz02g05130 | O  |
|                                                        | <i>CPSRP54B</i> | Cz08g20150 | M  |
| Preprotein Translocase SecY                            | <i>SECY1</i>    | Cz04g37160 | SP |
|                                                        | <i>SECY2</i>    | Cz05g25080 | SP |
| Alpha Subunit of ER Translocon                         | <i>SEC61A</i>   | Cz01g29020 | SP |

---

### Photosystem & Chloroplast Assembly Factors

---

|                          |               |            |    |
|--------------------------|---------------|------------|----|
| PSI Assembly Factor      | <i>ycf3</i>   | CzCPg01160 | CE |
| PSI Assembly Factor      | <i>ycf4</i>   | CzCPg01170 | CE |
| Ycf3-Interacting Protein | <i>Y3IP1</i>  | Cz15g08190 | O  |
| PSII Assembly Factor     | <i>HCF136</i> | Cz10g21040 | O  |
| Low PSII Accumulating    | <i>LPA1A</i>  | Cz05g07170 | C  |

|                                                          |                |            |    |
|----------------------------------------------------------|----------------|------------|----|
|                                                          | <i>LPA1B</i>   | Cz01g20260 | C  |
|                                                          | <i>LPA3A</i>   | Cz16g08170 | C  |
|                                                          | <i>LPA3B</i>   | Cz12g08020 | O  |
| Chloroplast Ser-Thr Kinase 7                             | <i>STN7</i>    | Cz06g00060 | C  |
| Chloroplast Ser-Thr Kinase 8                             | <i>STN8</i>    | Cz10g22110 | M  |
| Accumulation/Replication of Chloroplasts                 | <i>ARC6A</i>   | Cz06g19140 | O  |
|                                                          | <i>ARC6B</i>   | Cz09g17290 | C  |
|                                                          | <i>ARC6C</i>   | Cz01g24010 | O  |
| Potassium/Proton Antiporter                              | <i>KEA1</i>    | Cz13g09190 | O  |
|                                                          | <i>KEA3</i>    | Cz07g15180 | O  |
|                                                          | <i>KEA4</i>    | Cz10g20050 | O  |
| ATP-Dependent Zn Metalloproteinase                       | <i>ftsH</i>    | CzCPg00050 | CE |
|                                                          | <i>FTSH</i>    | Cz02g25060 | C  |
| Chloroplast Rubredoxin                                   | <i>RBD1</i>    | Cz05g36060 | O  |
| PsbP Domain Containing Proteins                          | <i>PPD1</i>    | Cz03g13190 | C  |
|                                                          | <i>PPD2</i>    | Cz19g02070 | O  |
|                                                          | <i>PPD3</i>    | Cz14g21260 | O  |
|                                                          | <i>PPD4</i>    | Cz01g04150 | O  |
|                                                          | <i>PPD5</i>    | Cz12g14170 | C  |
|                                                          | <i>PPD6</i>    | Cz04g08120 | C  |
|                                                          | <i>PPD7</i>    | Cz04g12120 | C  |
|                                                          | <i>PPD8</i>    | Cz10g23090 | O  |
|                                                          | <i>PPD9</i>    | Cz04g02050 | C  |
| High Chl Fluorescence 101: 4Fe-4S Scaffold               | <i>HCF101</i>  | Cz04g32150 | SP |
| High Chl Fluorescence 164: Trx-Like                      | <i>HCF164A</i> | Cz07g07160 | O  |
|                                                          | <i>HCF164B</i> | Cz08g24090 | C  |
| Membrane Insertion Protein                               | <i>OxaA1</i>   | Cz03g01150 | M  |
|                                                          | <i>OxaA2</i>   | Cz01g09150 | M  |
| Albino-3                                                 | <i>ALB3A</i>   | Cz05g17260 | SP |
|                                                          | <i>ALB3B</i>   | Cz05g36130 | O  |
| Curvature of the Thylakoid Protein                       | <i>CURT1</i>   | Cz05g04030 | C  |
| Thylakoid Formation Factor                               | <i>THF1</i>    | Cz05g05190 | C  |
| Putative Retrograde Signaling Factor, DUF3506 Containing | <i>EX1</i>     | Cz01g19060 | C  |
|                                                          | <i>EX2</i>     | Cz06g34170 | O  |
| PsbA Maturation Factor                                   | <i>PAM68</i>   | Cz02g08100 | C  |
| Chloroplast Sec14-Like Protein                           | <i>CPSFL1</i>  | Cz03g12090 | C  |
| Proton Gradient Regulator                                | <i>PGR7</i>    | Cz11g03230 | SP |

---

### Fatty Acid Biosynthesis

|                      |             |            |   |
|----------------------|-------------|------------|---|
| Acetyl Co-A Synthase | <i>ACSI</i> | Cz12g10100 | O |
|                      | <i>ACS2</i> | Cz09g15060 | O |

|                                                           |               |            |    |
|-----------------------------------------------------------|---------------|------------|----|
| Acyl-Carrier Protein (ACP)                                | <i>ACP1</i>   | Cz07g17120 | C  |
|                                                           | <i>ACP2</i>   | Cz09g30220 | C  |
| Acetyl-CoA Carboxylase Carboxyltransferase, beta Subunit  | <i>CAC1</i>   | Cz02g17060 | O  |
| Acetyl-CoA Carboxylase Carboxyltransferase, alpha Subunit | <i>CAC2</i>   | Cz02g12030 | O  |
| Acetyl-CoA Carboxylase                                    | <i>ACC1</i>   | Cz19g10190 | O  |
| Biotin Acetyl-CoA Ligase                                  | <i>BPL</i>    | Cz14g10290 | O  |
| Malonyl-CoA:ACP Acyltransferase                           | <i>MCT1</i>   | Cz13g05150 | O  |
|                                                           | <i>MCT2</i>   | Cz04g37050 | O  |
| Beta-Ketoacyl ACP Synthase                                | <i>KAS1</i>   | Cz02g14160 | C  |
|                                                           | <i>KAS2</i>   | UNPLg00257 | C  |
|                                                           | <i>KAS3</i>   | Cz18g03070 | O  |
| Beta-Ketoacyl Synthase                                    | <i>KASX</i>   | Cz06g14030 | M  |
| Beta-Ketoacyl ACP Reductase                               | <i>KAR1</i>   | Cz01g34370 | M  |
|                                                           | <i>KAR2</i>   | Cz16g00050 | O  |
|                                                           | <i>KAR3</i>   | Cz15g00050 | O  |
|                                                           | <i>KAR4</i>   | Cz04g17270 | O  |
|                                                           | <i>KAR5</i>   | Cz11g27250 | SP |
| Beta-Hydroxyacyl ACP Dehydrase/Dehydratase                | <i>FABZ</i>   | Cz01g09160 | C  |
| Enoyl ACP Reductase                                       | <i>ENR</i>    | Cz11g20040 | C  |
| Long-Chain Beta-Ketoacyl Synthase                         | <i>LCKAS1</i> | Cz06g36280 | SP |
|                                                           | <i>LCKAS2</i> | Cz12g02090 | O  |
|                                                           | <i>LCKAS3</i> | Cz12g02100 | O  |
|                                                           | <i>LCKAS4</i> | Cz13g05060 | SP |
|                                                           | <i>LCKAS5</i> | Cz17g10060 | SP |
|                                                           | <i>LCKAS6</i> | Cz05g07110 | SP |
|                                                           | <i>LCKAS7</i> | Cz11g13060 | O  |
|                                                           | <i>LCKAS8</i> | Cz19g03050 | SP |

---

### Fatty Acid Metabolism

|                                     |              |            |    |
|-------------------------------------|--------------|------------|----|
| Enoyl-CoA ACP Hydratase             | <i>ECH1</i>  | Cz08g18230 | O  |
|                                     | <i>ECH2</i>  | Cz11g22170 | O  |
|                                     | <i>ECH3</i>  | Cz03g36260 | O  |
| Enoyl-CoA ACP Hydratase/Isomerase D | <i>ECHID</i> | Cz04g19010 | O  |
| Acetyl-CoA Acyltransferase Thiolase | <i>ATO2A</i> | Cz04g25080 | SP |
|                                     | <i>ATO2B</i> | Cz06g36270 | M  |

---

### Lipid Biosynthesis

|                                        |               |            |   |
|----------------------------------------|---------------|------------|---|
| Stearoyl ACP Desaturase                | <i>SACPD1</i> | Cz04g09090 | O |
|                                        | <i>SACPD2</i> | Cz13g17200 | C |
| Glycerol-3-Phosphate O-Acyltransferase | <i>GPAT1</i>  | Cz11g03260 | C |

|                                                             |               |            |    |
|-------------------------------------------------------------|---------------|------------|----|
|                                                             | <i>GPAT2</i>  | Cz09g31330 | M  |
| Lysophosphatidylcholine Acyltransferase                     | <i>LPCAT</i>  | Cz02g32040 | O  |
| Phosphatidylcholine Sterol Acyltransferase                  | <i>LCAT1</i>  | Cz17g15210 | O  |
|                                                             | <i>LCAT2</i>  | Cz14g23330 | O  |
| Cytidinediphosphate Diacylglycerol Synthase                 | <i>PCT1</i>   | Cz01g36190 | O  |
|                                                             | <i>PCT2</i>   | Cz10g20080 | SP |
| Sulfolipid Synthase                                         | <i>SQD2</i>   | Cz07g23140 | O  |
| UPD-Sulfoquinovosyl Synthase                                | <i>SQD1</i>   | Cz03g31030 | C  |
| Phospholipid : Diacylglycerol Acyltransferase               | <i>PDAT</i>   | Cz10g07210 | O  |
| Glycerol-3-Phosphate Dehydrogenase                          | <i>GPDH1</i>  | Cz10g29180 | O  |
|                                                             | <i>GPDH2</i>  | Cz12g24180 | O  |
| Diacylglycerol Kinase                                       | <i>DGK1</i>   | Cz05g16250 | O  |
|                                                             | <i>DGK2</i>   | Cz01g12160 | O  |
| Diacylglycerol Acyltransferase Type 1                       | <i>DGAT1A</i> | Cz06g04190 | SP |
|                                                             | <i>DGAT1B</i> | Cz09g23020 | O  |
|                                                             | <i>DGAT1C</i> | Cz03g14080 | O  |
| Membrane Bound Diacylglycerol Acyltransferase MBOAT, Type 1 | <i>DGAT1D</i> | Cz09g08290 | O  |
| Diacylglycerol Acyltransferase Type 2                       | <i>DGAT2A</i> | Cz08g14220 | O  |
|                                                             | <i>DGAT2B</i> | Cz11g21100 | O  |
|                                                             | <i>DGAT2C</i> | Cz11g24150 | SP |
|                                                             | <i>DGAT2D</i> | Cz09g27290 | SP |
|                                                             | <i>DGAT2E</i> | Cz15g22140 | O  |
| Diacylglycerol Acyltransferase Type 2B                      | <i>DGAT2F</i> | Cz06g35060 | O  |
|                                                             | <i>DGAT2G</i> | Cz06g22030 | O  |
| Triacylglycerol Lipase                                      | <i>LIP1</i>   | Cz02g24260 | SP |
|                                                             | <i>LIP2</i>   | Cz13g03050 | O  |
| Phosphatidylglycerophosphate Synthase                       | <i>PGP1</i>   | Cz01g26180 | C  |
|                                                             | <i>PGP2</i>   | Cz06g21300 | M  |
| Dihydroxyacetone Kinase                                     | <i>DAK</i>    | Cz10g02240 | O  |
| Triosephosphate Isomerase                                   | <i>TPI</i>    | Cz06g17270 | O  |
| Glycerol-3-Phosphate Dehydrogenase                          | <i>GPD1</i>   | Cz10g29180 | O  |
|                                                             | <i>GPD2</i>   | Cz12g24180 | O  |
| Fatty Acid-Desaturase A                                     | <i>FADA</i>   | Cz12g10230 | SP |
| Fatty Acid-Desaturase, omega-3                              | <i>FAD7A</i>  | Cz04g31180 | C  |
|                                                             | <i>FAD7B</i>  | Cz06g28130 | C  |
| Fatty Acid Desaturase, omega-6                              | <i>FAD2A</i>  | Cz03g33220 | O  |
|                                                             | <i>FAD2B</i>  | Cz08g04110 | C  |
| Fatty Acid Desaturase, delta-6                              | <i>FAD3A</i>  | UNPLg00012 | O  |
|                                                             | <i>FAD3B</i>  | Cz06g12050 | C  |
| Fatty Acid Desaturase, delta-9                              | <i>FAD5A1</i> | Cz07g00120 | SP |

|                                                       |               |            |    |
|-------------------------------------------------------|---------------|------------|----|
|                                                       | <i>FAD5A2</i> | Cz06g00170 | O  |
|                                                       | <i>FAD5C</i>  | Cz13g01140 | O  |
| Fatty Acid Desaturase, delta-12                       | <i>FAD6A</i>  | Cz08g21150 | SP |
|                                                       | <i>FAD6B</i>  | Cz11g21120 | O  |
| Long Chain Acyl-CoA Synthetase                        | <i>LACS1</i>  | Cz07g22230 | O  |
|                                                       | <i>LACS2</i>  | Cz11g20120 | C  |
|                                                       | <i>LACS3</i>  | Cz05g30060 | O  |
|                                                       | <i>LACS4</i>  | Cz01g36150 | O  |
| Phosphatidate Phosphatase                             | <i>PAP</i>    | Cz08g10040 | C  |
| CDP:DAG Synthetase                                    | <i>CDS</i>    | Cz01g36190 | O  |
| S-Adenosylmethionine Synthetase                       | <i>METM</i>   | Cz15g18200 | O  |
|                                                       | <i>METK</i>   | Cz05g24030 | O  |
| Betaine Lipid Synthase                                | <i>BTA</i>    | Cz01g13260 | O  |
| CDP-Ethanolamine: DAG-Ethanolamine Phosphotransferase | <i>EPT</i>    | Cz05g09130 | O  |
| Serine Decarboxylase                                  | <i>SDC</i>    | Cz06g24140 | O  |
| Ethanolamine Kinase                                   | <i>ETK</i>    | Cz11g15030 | SP |
| CTP:Phosphoethanolamine Cytidyltransferase            | <i>ECT</i>    | Cz05g17180 | SP |
| Inositol-3-Phosphate Synthase                         | <i>IPS</i>    | Cz01g18130 | O  |
| CDP-DAG:Inositol Phosphatidyltransferase              | <i>PIS</i>    | Cz17g13240 | O  |
| Monogalactosyldiacylglycerol Synthase                 | <i>MGD</i>    | Cz08g30040 | O  |
| Digalactosyldiacylglycerol Synthase                   | <i>DGD1</i>   | Cz13g19030 | O  |
|                                                       | <i>DGD2</i>   | Cz10g17090 | O  |

---

### Calvin-Benson-Bassham Cycle

---

|                                          |              |            |   |
|------------------------------------------|--------------|------------|---|
| Rubisco Accumulation Factor              | <i>RAF</i>   | Cz09g07180 | C |
| Rubisco Activase                         | <i>RCA1</i>  | Cz03g15230 | C |
|                                          | <i>RCA2</i>  | Cz13g02230 | O |
| Rubisco Small Subunit                    | <i>RBCS</i>  | Cz17g13100 | C |
| Rubisco Large Subunit                    | <i>rbcL</i>  | CzCPg00360 | C |
| Rubisco Large Subunit Methyltransferase  | <i>RBCMT</i> | Cz05g09240 | O |
| Phosphoglycerate Dehydrogenase           | <i>PGD</i>   | Cz01g24020 | O |
| Phosphoglycerate Kinase                  | <i>PGK</i>   | Cz16g19260 | C |
| Glyceraldehyde-3-Phosphate Dehydrogenase | <i>GAPDH</i> | Cz05g34160 | C |
| Triose Phosphate Isomerase               | <i>TPI</i>   | Cz06g17270 | O |
| Fructose-Bisphosphate Aldolase           | <i>FBA1</i>  | Cz03g13070 | O |
|                                          | <i>FBA2</i>  | Cz06g07090 | O |
|                                          | <i>FBA3</i>  | Cz05g37140 | C |
| Fructose-2,6-Bisphosphate-2-Phosphatase  | <i>FBP3A</i> | Cz16g19090 | O |
|                                          | <i>FBP3B</i> | Cz12g10060 | O |
| Fructose-1,6-Bisphosphatase              | <i>FBP1</i>  | Cz05g01180 | C |

|                                  |             |            |   |
|----------------------------------|-------------|------------|---|
|                                  | <i>FBP2</i> | Cz04g03070 | C |
| Transketolase                    | <i>TRK</i>  | Cz03g04080 | C |
| Sedoheptulose-1,7-Bisphosphatase | <i>SBP</i>  | Cz01g42020 | C |
| Ribulose-5-Phosphate-3-Epimerase | <i>RPE2</i> | Cz04g31230 | O |
|                                  | <i>RPE1</i> | Cz05g11190 | C |
| Ribose-5-Phosphate Isomerase     | <i>RPI1</i> | Cz09g17220 | C |
|                                  | <i>RPI2</i> | Cz01g08190 | M |
| Phosphoribulokinase              | <i>PRK</i>  | Cz07g08080 | O |

---

### TCA / Glyoxylate Cycle

---

|                                          |              |            |    |
|------------------------------------------|--------------|------------|----|
| Citrate Synthase                         | <i>CIT</i>   | Cz02g27080 | M  |
| Aconitase                                | <i>ACH1</i>  | Cz13g00140 | C  |
| Isocitrate Lyase                         | <i>ICL</i>   | Cz07g04220 | O  |
| Malate Synthase                          | <i>MAS1</i>  | Cz14g25060 | O  |
| Malate Dehydrogenase                     | <i>MDH1</i>  | Cz01g16230 | C  |
|                                          | <i>MDH2</i>  | Cz02g21340 | O  |
|                                          | <i>MDH3</i>  | UNPLg00180 | O  |
|                                          | <i>MDH4</i>  | Cz12g06020 | C  |
|                                          | <i>MDH5</i>  | Cz04g33150 | C  |
| Isocitrate Dehydrogenase                 | <i>IDH1</i>  | Cz11g08120 | M  |
|                                          | <i>IDH2</i>  | Cz11g28180 | M  |
| 2-Oxoglutarate Dehydrogenase, E1 Subunit | <i>OGD</i>   | Cz05g03220 | M  |
| Succinyl-CoA Synthetase/Ligase, alpha    | <i>SCL1</i>  | Cz01g33150 | O  |
| Succinyl-CoA Synthetase/Ligase, beta     | <i>SCL2</i>  | Cz03g31200 | O  |
| Succinate Semialdehyde Dehydrogenase     | <i>SSADH</i> | Cz05g02090 | M  |
| Succinate Dehydrogenase Subunit 1        | <i>SDH1</i>  | Cz03g18320 | M  |
| Succinate Dehydrogenase Subunit 2        | <i>SDH2</i>  | Cz15g13230 | M  |
| Succinate Dehydrogenase, b560 Subunit    | <i>SDH3</i>  | Cz07g14020 | M  |
| Succinate Dehydrogenase Subunit 4        | <i>SDH4</i>  | Cz07g14015 | O  |
| Fumarase                                 | <i>FUM</i>   | Cz07g04030 | SP |

---

### Glycolysis

---

|                               |             |            |   |
|-------------------------------|-------------|------------|---|
| Sucrose Synthase              | <i>SUC1</i> | Cz05g24180 | M |
| Hexokinase                    | <i>HXK1</i> | Cz13g07170 | O |
| UDP-Glucose Pyrophosphorylase | <i>UGP</i>  | UNPLg00641 | O |
|                               | <i>UGP2</i> | Cz07g13190 | C |
| Phosphoglucomutase            | <i>GPM1</i> | Cz04g03150 | C |
|                               | <i>GPM2</i> | Cz15g21100 | O |
| Phosphofructokinase           | <i>PFK1</i> | Cz09g25120 | C |
|                               | <i>PFK2</i> | Cz07g13120 | C |

|                                   |              |            |    |
|-----------------------------------|--------------|------------|----|
| Glucose-6-Phosphate Dehydrogenase | <i>GPDH1</i> | Cz03g12030 | C  |
|                                   | <i>GPDH2</i> | Cz06g12080 | C  |
| 6-Phosphogluconate Dehydrogenase  | <i>GND</i>   | Cz05g06160 | M  |
| Pyruvate Carboxylase              | <i>PYC</i>   | Cz04g02090 | SP |
| PEP Carboxykinase                 | <i>PCK</i>   | Cz01g05160 | C  |
| PEP Carboxylase                   | <i>PEPC1</i> | UNPLg00263 | O  |
|                                   | <i>PEPC2</i> | Cz01g21210 | O  |
|                                   | <i>PEPC3</i> | Cz14g19100 | C  |
| Phosphoglycerate Mutase           | <i>PGM1</i>  | Cz04g11130 | O  |
|                                   | <i>PGM3</i>  | Cz14g01200 | C  |
|                                   | <i>PGM4</i>  | Cz14g08090 | C  |
|                                   | <i>PGM5</i>  | Cz06g01110 | O  |
|                                   | <i>PGM7</i>  | Cz01g38050 | M  |
| Enolase                           | <i>ENO</i>   | Cz05g10010 | O  |
| Pyruvate Kinase                   | <i>PYK1</i>  | Cz15g09100 | O  |
|                                   | <i>PYK2</i>  | Cz01g21060 | O  |
|                                   | <i>PYK3</i>  | Cz14g14130 | O  |
|                                   | <i>PYK4</i>  | Cz10g06190 | O  |
|                                   | <i>PYK5</i>  | Cz16g00040 | O  |
| Pyruvate Decarboxylase            | <i>PDC</i>   | Cz01g33100 | O  |
| NADP-Malic Enzyme                 | <i>MME1</i>  | Cz15g01060 | M  |
|                                   | <i>MME2</i>  | Cz15g18140 | O  |
|                                   | <i>MME4</i>  | Cz09g11240 | O  |
|                                   | <i>MME5</i>  | Cz07g26110 | O  |
|                                   | <i>MME6</i>  | Cz04g02110 | SP |

---



**Table S4. *Chromochloris zofingiensis* astaxanthin-deficient mutant characteristics.**

| Mutant         | Phenotype      | Mutation location | Region                                  | Molecular basis of the mutation                                                                 |
|----------------|----------------|-------------------|-----------------------------------------|-------------------------------------------------------------------------------------------------|
| <i>bkt1-1</i>  | no astaxanthin | 164 aa            | highly conserved                        | Pro to Ser                                                                                      |
| <i>bkt1-2</i>  | no astaxanthin | 275 aa            | highly conserved                        | Pro to Leu                                                                                      |
| <i>bkt1-3</i>  | no astaxanthin | 163 aa            | highly conserved                        | Asp to Asn                                                                                      |
| <i>bkt1-4</i>  | no astaxanthin | 225 aa            | medium conserved                        | Arg to stop                                                                                     |
| <i>bkt1-6</i>  | no astaxanthin | 210 aa            | medium conserved                        | Leu to stop                                                                                     |
| <i>bkt1-7</i>  | no astaxanthin | 131 aa            | highly conserved                        | Gly to Asp                                                                                      |
| <i>bkt1-9</i>  | no astaxanthin | 165 aa            | highly conserved                        | Asp to Val                                                                                      |
| <i>bkt1-14</i> | no astaxanthin | 251 aa            | highly conserved                        | Ser to Leu                                                                                      |
| <i>bkt1-15</i> | no astaxanthin | 165 aa            | highly conserved                        | Pro to Thr                                                                                      |
| <i>bkt1-16</i> | no astaxanthin | 166 aa            | highly conserved                        | Asp to Glu                                                                                      |
| <i>bkt1-17</i> | no astaxanthin | 31 aa             | early stop                              | Gln to Stop                                                                                     |
| <i>bkt1-18</i> | no astaxanthin | 99 aa             | highly conserved                        | Leu to Pro                                                                                      |
| <i>bkt1-21</i> | no astaxanthin | 79 aa             | early stop                              | Trp to Met (2 mutations)<br>followed by a deletion of 5 base<br>frameshift to a stop after 7 aa |
| <i>bkt1-22</i> | no astaxanthin | 158 aa            | highly conserved                        | Thr to Ile                                                                                      |
| <i>bkt1-24</i> | no astaxanthin | 120 aa            | medium conserved                        | Ile to Phe                                                                                      |
| <i>bkt1-25</i> | no astaxanthin | 1st intron        | early deletion or<br>partially deletion | 314bp deletion from 1st intron<br>into second exon                                              |

**Table S5. PCR primers used to sequence beta-ketolase in *Chromochloris zofingiensis*.**

| Gene        | Forward Primer (5'-3') | Reverse Primer (5'-3')   |
|-------------|------------------------|--------------------------|
| <i>BKT1</i> | TACTCAGGCATCTACGTGTT   | TGCGAACAACTCAAAGCATA     |
| <i>BKT2</i> | ATTCAGGCGACTACATGACTGG | GTTGCATGGCTTTCTCACATCATT |

## Datasets key (for Datasets S1–S21)

Suggested filenames are for consistency with the project’s website: <http://genomes.mcdb.ucla.edu/Chromochloris/>.

### Assembly

*Genome nucleotide sequences in plain text FASTA format (“ChrZof version 5 release of 2017-01-01”):*

**Dataset S1** (ChrZofV5.lcMaskByRepeatMasker-on-RepeatModeler\_plus\_AllRepBase20160829.fasta) — both;

**Dataset S2** (ChrZofV5.lcMaskByRepeatMasker-on-RepeatModeler.fasta) — masked via RepeatModeler;

**Dataset S3** (ChrZofV5.lcMaskByRepeatMasker-on-AllRepBase20160829.fasta) — masked via RepBase;

The three flavors differ in their level of lowercase repeat masking. Dataset S1 is suggested as a default.

*Known assembly issues for ChrZofV5 in Microsoft Excel format:*

**Dataset S4** (ChrZofV5-KnownAssemblyIssues.xls) — list;

**Dataset S5** (ChrZofV5-KnownAssemblyIssues-Summary.xls) — summary of list.

*Optical map (of nominal date 2017-01-01):*

**Dataset S6** (ChrZof-OpticalMap-asOrderedListOfBamHIopticalFragmentLengthsInBP.txt) — plain text giving, for each nuclear chromosome, estimated lengths of successive BamHI complete digest fragments in nucleotide basepairs, traveling 5’ to 3’ along plus strands.

**Dataset S7** (ChrZof-OpticalMap-in-OpGen-MapSolver-XML-Format.xml) — OpGen MapSolver XML version.

(Project website file ‘RepeatMaskerRepeatModeler-ChrZof.tar’ with details of repeat analysis was too complex to include with the journal publication and is omitted as a Dataset.)

### tRNAs

**Dataset S8** (ChrZofV5.lcMaskByRepeatMasker-on-RepeatModeler\_plus\_AllRepBase20160829.noCpMt.tRNAscan-SE-1.3.1.output.txt) — plain text direct from tRNAscan-SE 1.3.1.

### Gene families

**Dataset S9** (ChrZof-v5.2-OrthologsV3.famId-ChrZofs-ChlReis-AraThas-CocSubs-Chlores-MonNegs-numPrimaryGenesSameOrgoOrder-numAdditionalGenesSameOrgoOrder.txt) —

plain text with tab-separated columns giving 3rd version of orthologs based on *C. zof.* version 5.2 gene models:

Column 1: family accession in pattern “CzOrth\_5.2-3\_#####”;

Columns 2, ..., 7: comma-separated gene names for Table S1 genome *Chromochloris zofingiensis*,

*Chlamydomonas reinhardtii*, *Arabidopsis thaliana*, *Coccomyxa subellipsoidea* C-169, *Chlorella sp.* NC64A, and *Monoraphidium neglectum*, respectively (‘&’ suffix to gene name indicates additional gene, else primary);

Columns 8, ..., 13: for same order of organisms, number of primary genes as non-negative decimal integer;

Columns 14, ..., 19: for same order of organisms, number of additional genes as non-negative decimal integer.

**Dataset S10** (InfoExtractsOrthosV3-CzHasOneOrMoreOf520handTags.keepLongInfos.txt) —  $\geq 1$  *C. zof.* hand-tag;

**Dataset S11** (InfoExtractsOrthosV3-CzHasOneOrMoreOf520handTags.omitLongInfos.txt) —  $\geq 1$  *C. zof.* hand-tag;

**Dataset S12** (InfoExtractsOrthosV3-CzNoneHandTagged.keepLongInfos.txt) —  $\geq 1$  *C. zof.* but none hand-tagged;

**Dataset S13** (InfoExtractsOrthosV3-CzNoneHandTagged.omitLongInfos.txt) —  $\geq 1$  *C. zof.* but none hand-tagged;

**Dataset S14** (InfoExtractsOrthosV3-PureNonCZ.keepLongInfos.txt) — families with no *C. zof.* genes;

**Dataset S15** (InfoExtractsOrthosV3-PureNonCZ.omitLongInfos.txt) — families with no *C. zof.* genes;

These plain text files give compilations of various useful pieces of information from genome projects of Table S1 for the ChrZof-v5.2-OrthologsV3 gene families. Datasets S10/S12/S14 have all information (including long free text), while S11/S13/S15 keep only shorter information. Families partition to S10/S11 vs. S12/S13 vs. S14/S15 according to if they involve at least one hand-tagged *C. zof.* gene, else any *C. zof.* gene, and all the rest.

**Dataset S16** (ChrZof-v5.2-OrthologsV3.geneSymbols-AraTha-ChlRei-ChrZof.ChrZofYesHandSymboled.txt);

**Dataset S17** (ChrZof-v5.2-OrthologsV3.geneSymbols-AraTha-ChlRei-ChrZof.ChrZofNotHandSymboled.txt);

**Dataset S18** (ChrZof-v5.2-OrthologsV3.geneSymbols-AraTha-ChlRei-ChrZof.ChrZofNotHaveAnyGenes.txt):

These tab-separated plain text files compile gene symbol annotations from genome projects of Table S1 for the ChrZof-v5.2-OrthologsV3 gene families:

Column 1: family accession in pattern “CzOrth\_5.2-3\_#####”;

Columns 2, ..., 4: gene symbols associated to the *Arabidopsis thaliana*, *Chlamydomonas reinhardtii*, and *Chromochloris zofingiensis* genes, respectively, in the gene family.

Families are in Dataset S16 if have  $\geq 1$  *C. zof.* hand-symboled gene, else S17 if  $\geq 1$  *C. zof.* gene, else S18.

## Genes

**Dataset S19** (ChrZof.annotations.v5.2.3.2.gff3) — GFF3-format ver. 5.2.3.2 gene models on ChrZofV5 assembly.

## Expression

**Dataset S20** (transcriptome\_RNA-Seq\_FPKMs.txt) — plain text matrix with rows for *C. zof.* genes (with identifier in first column) and columns for FPKMs over diverse series conditions.

**Dataset S21** (high-light\_RNA-Seq\_FPKMs.txt) — plain text matrix with rows for *C. zof.* genes (with identifier in first column) and columns for FPKMs over high light series conditions.

## SI References

1. Parkinson DY, *et al.* (2013) Nanoimaging cells using soft X-ray tomography. *Methods Mol Biol* 950:457-481.
2. Le Gros MA, *et al.* (2012) Visualizing sub-cellular organization using soft X-ray tomography. *Comprehensive Biophysics*, Biophysical Techniques for Characterization of Cells, ed Egelman EH (Academic Press, Oxford), Vol 2, pp 90-110.
3. Le Gros M, *et al.* (2014) Biological soft X-ray tomography on beamline 2.1 at the Advanced Light Source. *J Synchrotron Radiat* 21(Pt 6):1370-1377.
4. Kremer JR, Mastronarde DN, & McIntosh JR (1996) Computer visualization of three-dimensional image data using IMOD. *J Struct Biol* 116(1):71-76.
5. <https://github.com/vsbuffalo/scythe>
6. Dobin A, *et al.* (2013) STAR: ultrafast universal RNA-seq aligner. *Bioinformatics* 29(1):15-21.
7. Trapnell C, *et al.* (2012) Differential gene and transcript expression analysis of RNA-seq experiments with TopHat and Cufflinks. *Nat Protoc* 7(3):562-578.
8. Goff L, Trapnell C, & Kelley D (2013) cummeRbund: Analysis, exploration, manipulation, and visualization of Cufflinks high-throughput sequencing data. *R package version 2.16.0*.
9. Gautier L, Cope L, Bolstad BM, & Irizarry RA (2004) affy--analysis of Affymetrix GeneChip data at the probe level. *Bioinformatics* 20(3):307-315.
10. Love MI, Huber W, & Anders S (2014) Moderated estimation of fold change and dispersion for RNA-seq data with DESeq2. *Genome Biol* 15(12):550.
11. Boisvert S, Raymond F, Godzaridis E, Laviolette F, & Corbeil J (2012) Ray Meta: scalable de novo metagenome assembly and profiling. *Genome Biol* 13(12):R122.
12. Simpson JT, *et al.* (2009) ABySS: A parallel assembler for short read sequence data. *Genome Res* 19(6):1117-1123.
13. Ribeiro FJ, *et al.* (2012) Finished bacterial genomes from shotgun sequence data. *Genome Res* 22(11):2270-2277.
14. Gnerre S, *et al.* (2011) High-quality draft assemblies of mammalian genomes from massively parallel sequence data. *Proc Natl Acad Sci USA* 108(4):1513-1518.
15. Langmead B, Trapnell C, Pop M, & Salzberg SL (2009) Ultrafast and memory-efficient alignment of short DNA sequences to the human genome. *Genome Biol* 10(3):R25.
16. Langmead B & Salzberg SL (2012) Fast gapped-read alignment with Bowtie 2. *Nat Meth* 9(4):357-359.
17. Kim D, Langmead B, & Salzberg SL (2015) HISAT: a fast spliced aligner with low memory requirements. *Nat Meth* 12(4):357-360.
18. Altschul SF, Gish W, Miller W, Myers EW, & Lipman DJ (1990) Basic local alignment search tool. *J Mol Biol* 215(3):403-410.
19. Camacho C, *et al.* (2009) BLAST+: architecture and applications. *BMC Bioinf* 10:421.
20. Kielbasa SM, Wan R, Sato K, Horton P, & Frith MC (2011) Adaptive seeds tame genomic sequence comparison. *Genome Res* 21(3):487-493.
21. Harris R (2007) Improved pairwise alignment of genomic DNA. Ph.D. Thesis (The Pennsylvania State University).
22. Kent WJ (2002) BLAT--the BLAST-like alignment tool. *Genome Res* 12(4):656-664.

23. Chaisson MJ & Tesler G (2012) Mapping single molecule sequencing reads using basic local alignment with successive refinement (BLASR): application and theory. *BMC Bioinf* 13:238.
24. Daily J (2016) Parasail: SIMD C library for global, semi-global, and local pairwise sequence alignments. *BMC Bioinf* 17:81.
25. Hackl T, Hedrich R, Schultz J, & Förster F (2014) proovread: large-scale high-accuracy PacBio correction through iterative short read consensus. *Bioinformatics* 30(21):3004-3011.
26. <https://github.com/jstjohn/SeqPrep>
27. Martin M (2011) Cutadapt removes adapter sequences from high-throughput sequencing reads. *EMBnet.journal* 17(1):10-12.
28. Marçais G & Kingsford C (2011) A fast, lock-free approach for efficient parallel counting of occurrences of k-mers. *Bioinformatics* 27(6):764-770.
29. Kurtz S, *et al.* (2004) Versatile and open software for comparing large genomes. *Genome Biol* 5(2):R12.
30. Benson G (1999) Tandem repeats finder: a program to analyze DNA sequences. *Nucl Acids Res* 27(2):573-580.
31. Warburton PE, Giordano J, Cheung F, Gelfand Y, & Benson G (2004) Inverted repeat structure of the human genome: the X-chromosome contains a preponderance of large, highly homologous inverted repeats that contain testes genes. *Genome Res* 14(10a):1861-1869.
32. Smit A, Hubley R, & Green P (2013-2015) RepeatMasker Open-4.0. <<http://www.repeatmasker.org>>.
33. Bao W, Kojima KK, & Kohany O (2015) Repbase Update, a database of repetitive elements in eukaryotic genomes. *Mobile DNA* 6:11.
34. Smit A & Hubley R (2008-2015 ) RepeatModeler Open-1.0. <<http://www.repeatmasker.org>>.
35. Stanke M, Schoffmann O, Morgenstern B, & Waack S (2006) Gene prediction in eukaryotes with a generalized hidden Markov model that uses hints from external sources. *BMC Bioinf* 7:62.
36. Lowe TM & Eddy SR (1997) tRNAscan-SE: a program for improved detection of transfer RNA genes in genomic sequence. *Nucl Acids Res* 25(5):0955-0964.
37. Fiume M, Williams V, Brook A, & Brudno M (2010) Savant: genome browser for high-throughput sequencing data. *Bioinformatics* 26(16):1938-1944.
38. Freese NH, Norris DC, & Loraine AE (2016) Integrated genome browser: visual analytics platform for genomics. *Bioinformatics* 32(14):2089-2095.
39. Thorvaldsdóttir H, Robinson JT, & Mesirov JP (2013) Integrative Genomics Viewer (IGV): high-performance genomics data visualization and exploration. *Briefings in Bioinformatics* 14(2):178-192.
40. Krzywinski M, *et al.* (2009) Circos: an information aesthetic for comparative genomics. *Genome Res* 19(9):1639-1645.
41. Li H, *et al.* (2009) The sequence alignment/map format and SAMtools. *Bioinformatics* 25(16):2078-2079.
42. <https://github.com/thegenemyers/DEXTRACTOR>
43. Anders S, Pyl PT, & Huber W (2014) HTSeq--a Python framework to work with high-throughput sequencing data. *Bioinformatics* 31(2):166-169.

44. Rice P, Longden I, & Bleasby A (2000) EMBOSS: the European Molecular Biology Open Software Suite. *Trends Genet* 16(6):276-277.
45. <https://www.ncbi.nlm.nih.gov/>
46. Finn RD, *et al.* (2016) The Pfam protein families database: towards a more sustainable future. *Nucl Acids Res* 44(D1):D279-D285.
47. Nawrocki EP, *et al.* (2015) Rfam 12.0: updates to the RNA families database. *Nucl Acids Res* 43(D1):D130-D137.
48. Lagesen K, *et al.* (2007) RNAmmer: consistent and rapid annotation of ribosomal RNA genes. *Nucleic Acids Res* 35(9):3100-3108.
49. The Arabidopsis Genome Initiative (2000) Analysis of the genome sequence of the flowering plant *Arabidopsis thaliana*. *Nature* 408(6814):796-815.
50. Haas BJ, *et al.* (2003) Improving the *Arabidopsis* genome annotation using maximal transcript alignment assemblies. *Nucl Acids Res* 31(19):5654-5666.
51. Blanc G, *et al.* (2012) The genome of the polar eukaryotic microalga *Coccomyxa subellipsoidea* reveals traits of cold adaptation. *Genome Biol* 13(5):R39.
52. Merchant SS, *et al.* (2007) The *Chlamydomonas* genome reveals the evolution of key animal and plant functions. *Science* 318(5848):245-251.
53. Blanc G, *et al.* (2010) The *Chlorella variabilis* NC64A genome reveals adaptation to photosymbiosis, coevolution with viruses, and cryptic sex. *Plant Cell* 22(9):2943-2955.
54. Bogen C, *et al.* (2013) Reconstruction of the lipid metabolism for the microalga *Monoraphidium neglectum* from its genome sequence reveals characteristics suitable for biofuel production. *BMC Genomics* 14:926.
55. Chandrasekhara C, Mohannath G, Blevins T, Pontvianne F, & Pikaard CS (2016) Chromosome-specific NOR inactivation explains selective rRNA gene silencing and dosage control in *Arabidopsis*. *Genes Dev* 30(2):177-190.
56. Huerta-Cepas J, Serra F, & Bork P (2016) ETE 3: Reconstruction, analysis, and visualization of phylogenomic data. *Mol Biol Evol* 33(6):1635-1638.
57. Price MN, Dehal PS, & Arkin AP (2010) FastTree 2 – approximately maximum-likelihood trees for large alignments. *PLoS ONE* 5(3):e9490.
58. Leliaert F, *et al.* (2012) Phylogeny and molecular evolution of the green algae. *Crit Rev Plant Sci* 31(1):1-46.
59. <https://www.blast2go.com/>
60. Consortium TGO (2015) Gene Ontology Consortium: going forward. *Nucl Acids Res* 43(D1):D1049-D1056.
61. Eddy SR (2012) A new generation of homology search tools based on probabilistic inference. *Genome Informatics 2009*, (Imperial College Press), pp 205-211.
62. <http://geneontology.org/external2go/pfam2go> (2016/09/17 11:36:45).
63. Baroli I, Do AD, Yamane T, & Niyogi KK (2003) Zeaxanthin accumulation in the absence of a functional xanthophyll cycle protects *Chlamydomonas reinhardtii* from photooxidative stress. *Plant Cell* 15(4):992-1008.
